# Supplementary material for: Complex rovibrational dynamics of the Ar·NO+ complex
Source: Royal Society of Chemistry journal article supplement (doi:10.1039/c6cp07731e), 2017-01-01
Supplement: c6cp07731e1.pdf [file c6cp07731e1.pdf]

## Complex rovibrational dynamics of the $\text{Ar}\cdot\text{NO}^+$ complex

Dóra Papp,<sup>1</sup> János Sarka,<sup>1</sup> Tamás Szidarovszky,<sup>1</sup> Attila G. Császár,<sup>1, a)</sup> Edit Mátyus,<sup>2</sup> Majdi Hochlaf,<sup>3</sup> and Thierry Stoecklin<sup>4, b)</sup>

<sup>1)</sup>*MTA-ELTE Complex Chemical Systems Research Group,  
H-1117 Budapest, Pázmány Péter sétány 1/A, Hungary*

<sup>2)</sup>*Institute of Chemistry, Eötvös Loránd University, H-1117 Budapest,  
Pázmány Péter sétány 1/A, Hungary*

<sup>3)</sup>*Université Paris-Est, Laboratoire Modélisation et Simulation Multi Echelle,  
MSME UMR 8208 CNRS, 5 bd Descartes, 77454 Marne-la-Vallée,  
France*

<sup>4)</sup>*Institut des Sciences Moléculaires, Université de Bordeaux,  
CNRS UMR 5255, 33405 Talence Cedex, France*

### Bound state wave function plots

2D cuts of the wave functions of all the 200 vibrational bound states of the  $\text{Ar}\cdot\text{NO}^+$  complex along the  $R$  and  $\theta$  Jacobi coordinates obtained from variational GENIUSH computations. The third  $r$  coordinate is held fixed at its equilibrium value. Energies corresponding to the eigenstates reported here can be found in the text file of the Electronic Supplementary Information.

---

<sup>a)</sup>csaszar@chem.elte.hu

<sup>b)</sup>thierry.stoecklin@u-bordeaux.fr

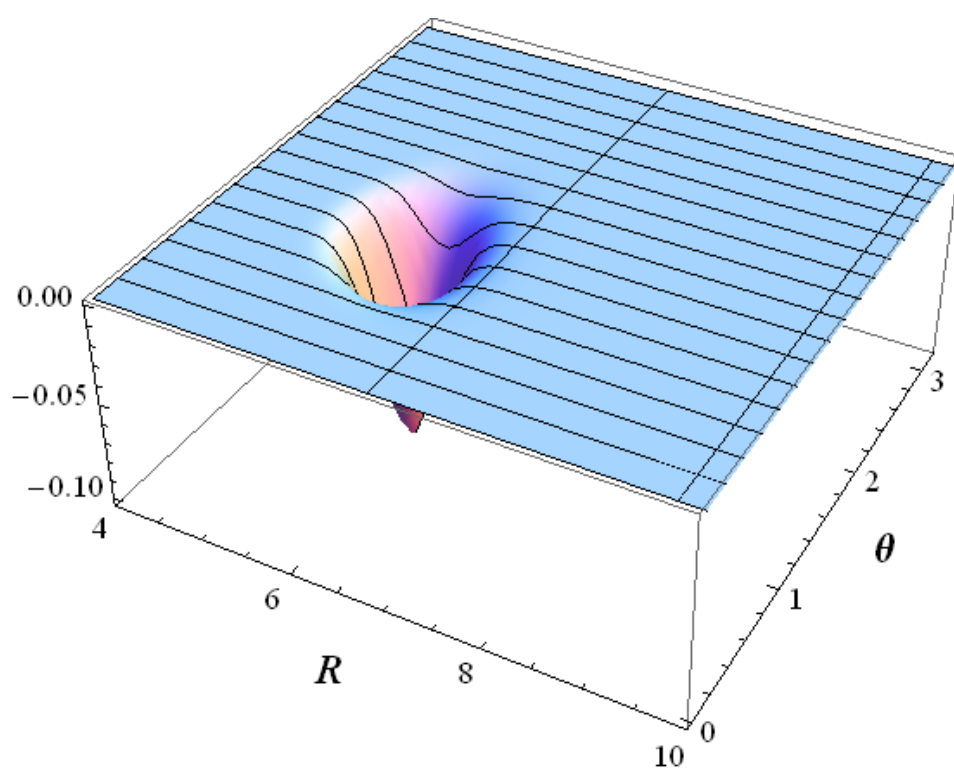

Figure S1. Eigenstate No. 1

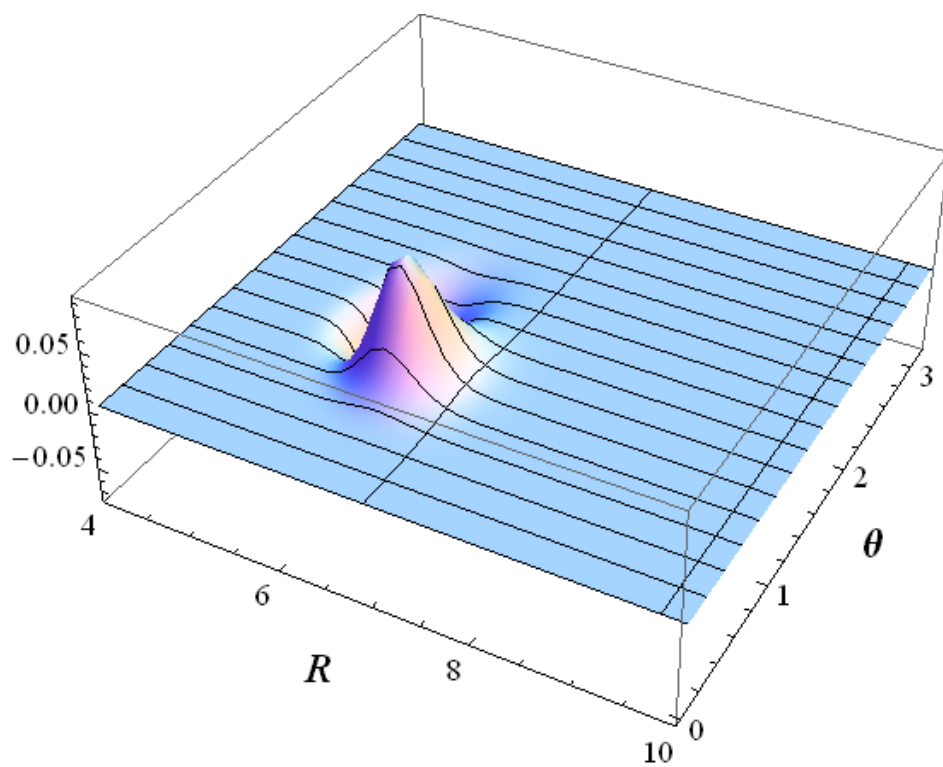

Figure S2. Eigenstate No. 2

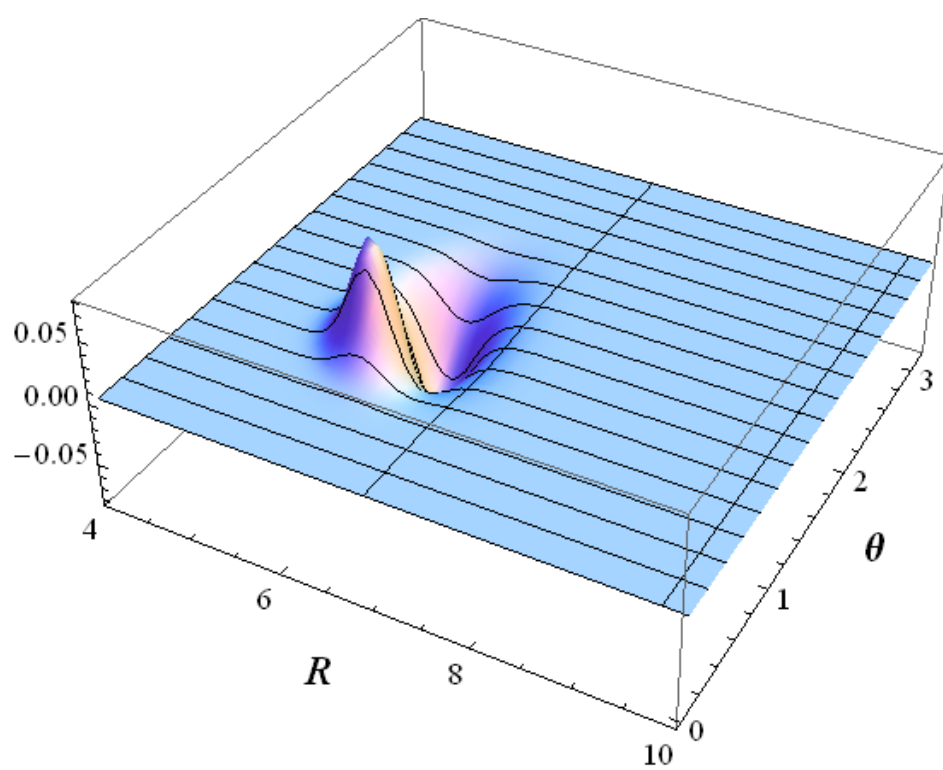

Figure S3. Eigenstate No. 3

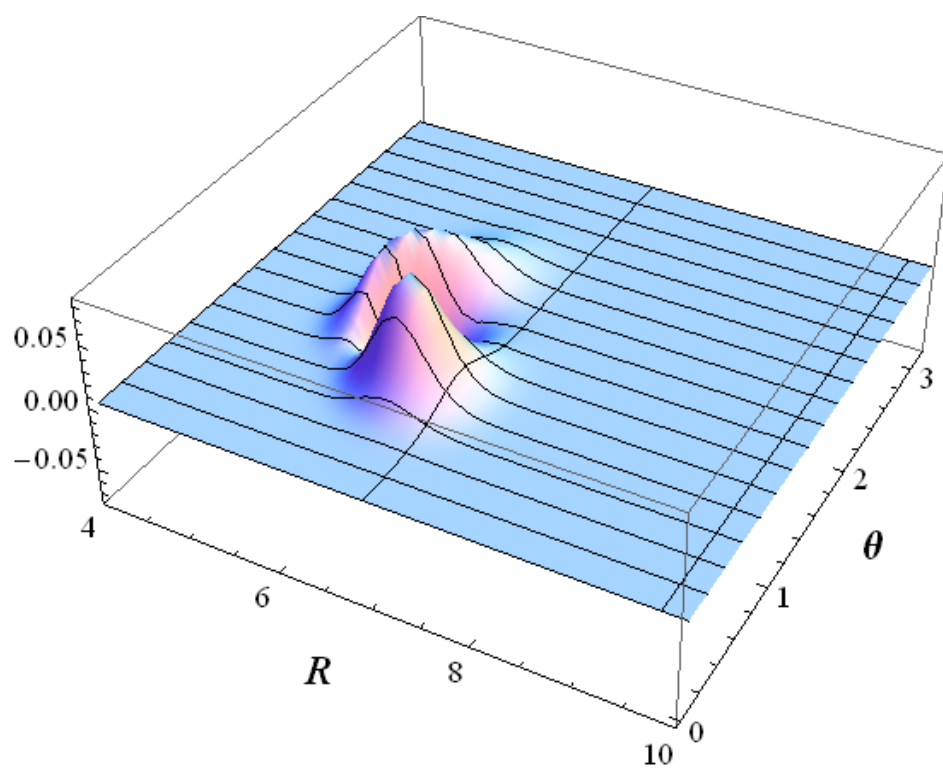

Figure S4. Eigenstate No. 4

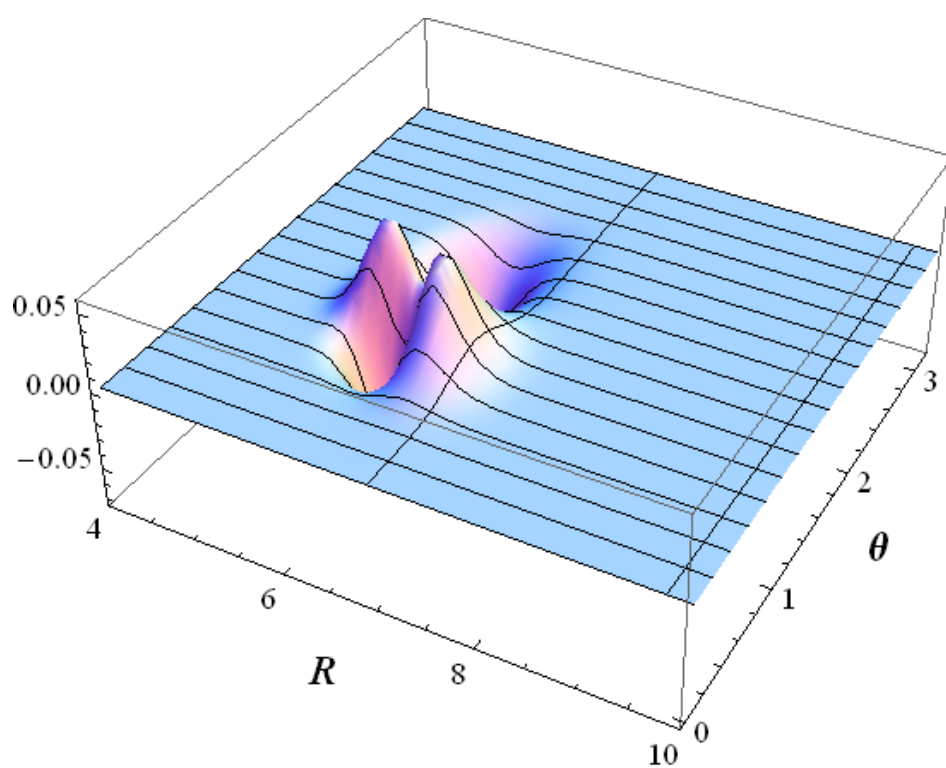

Figure S5. Eigenstate No. 5

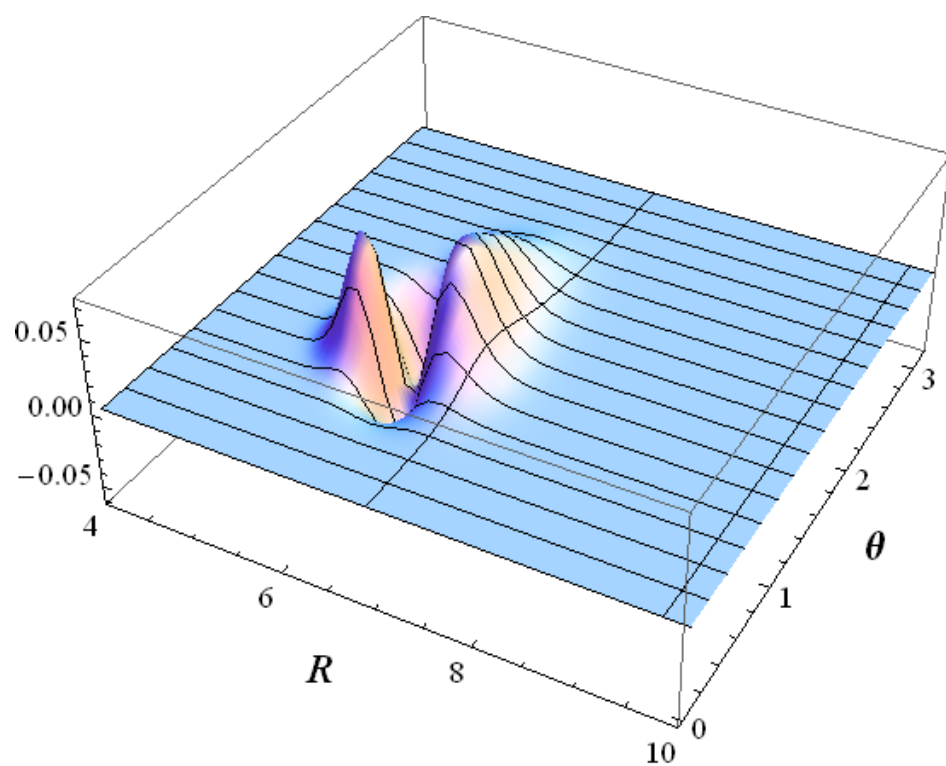

Figure S6. Eigenstate No. 6



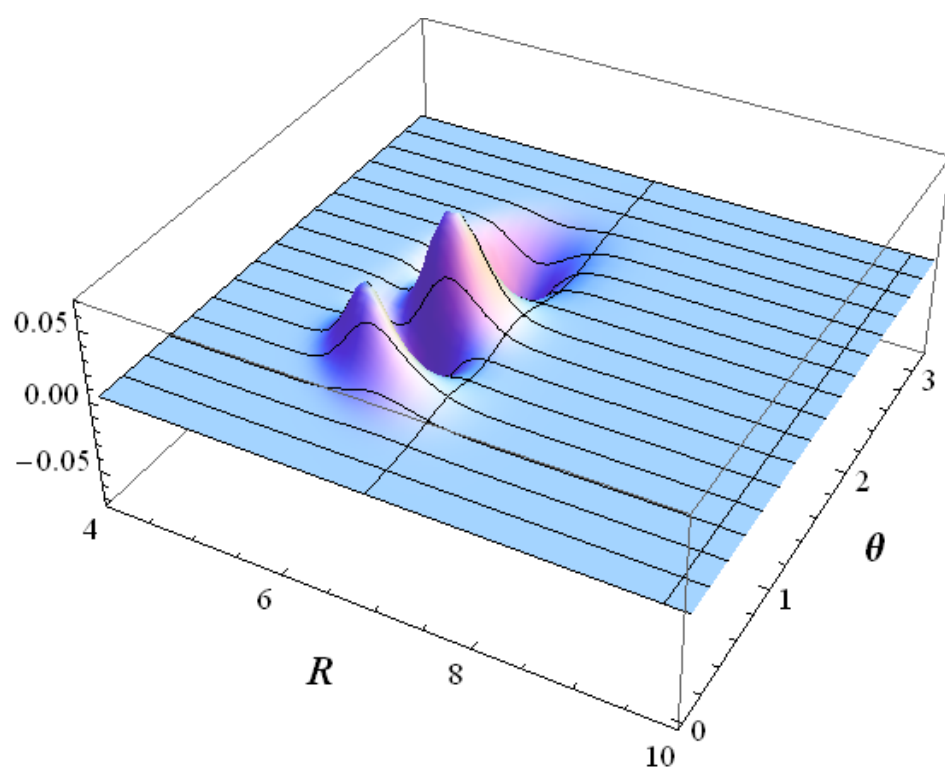

Figure S7. Eigenstate No. 7

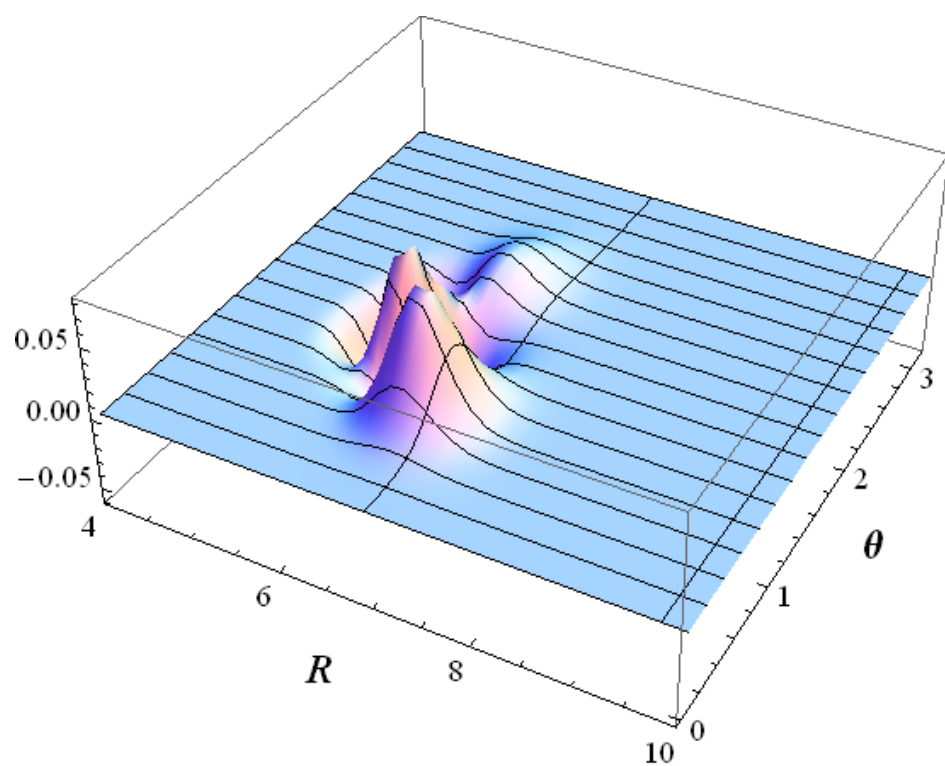

Figure S8. Eigenstate No. 8

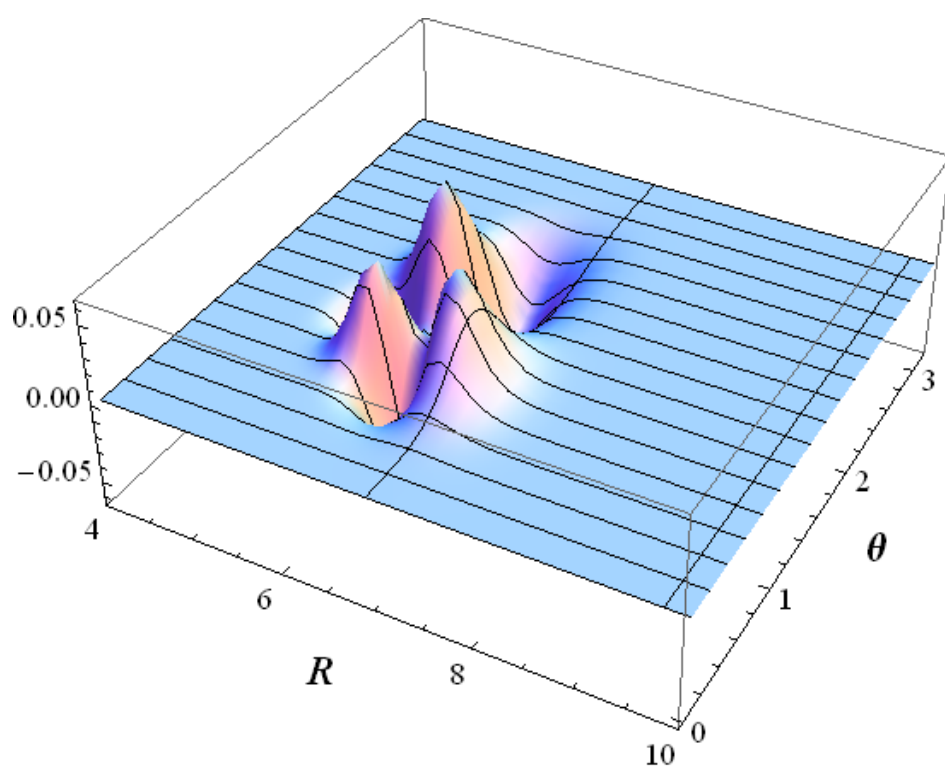

Figure S9. Eigenstate No. 9

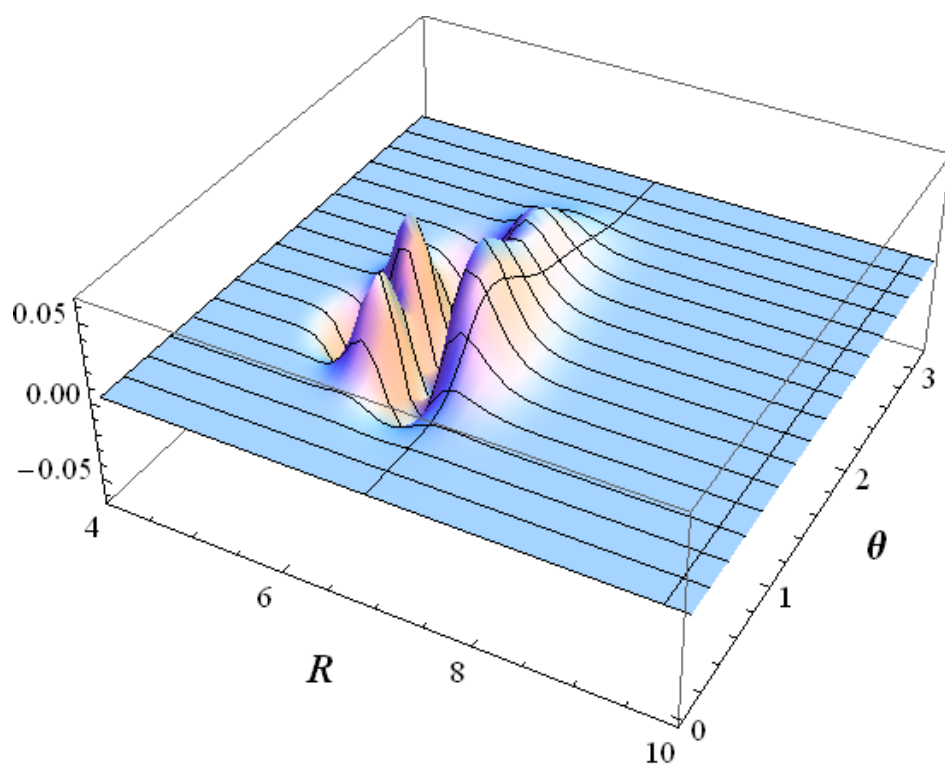

Figure S10. Eigenstate No. 10

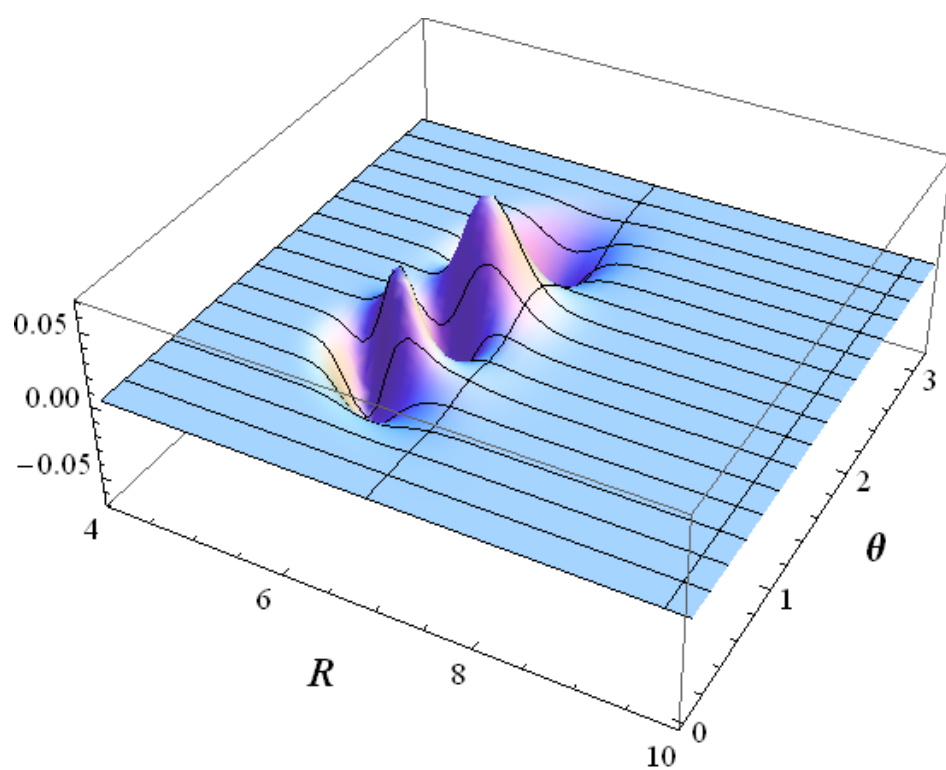

Figure S11. Eigenstate No. 11

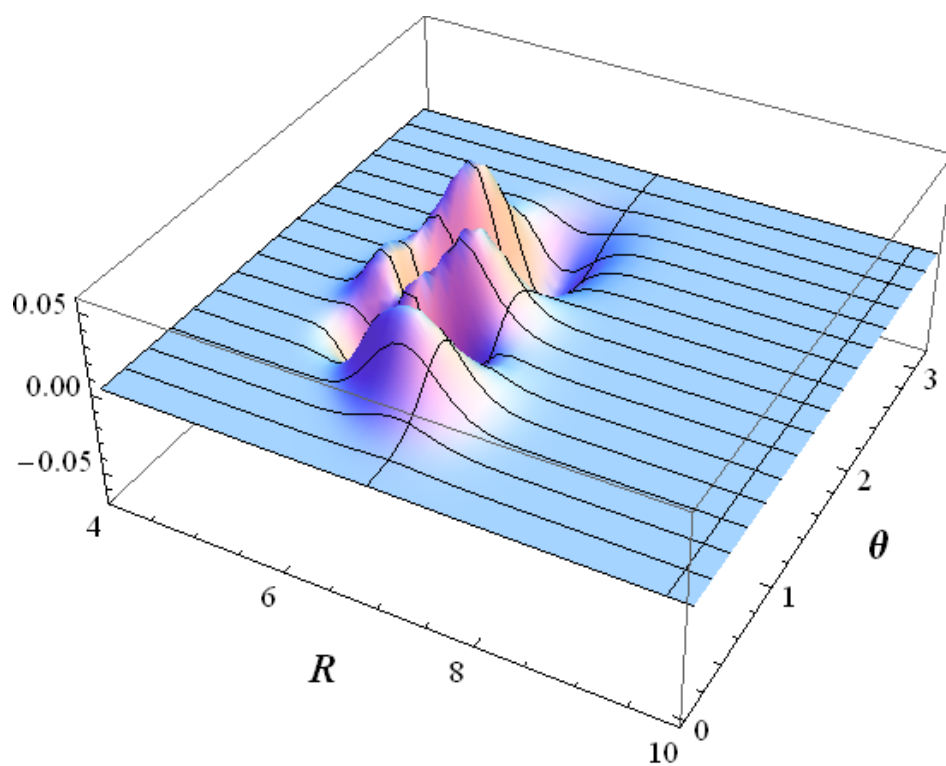

Figure S12. Eigenstate No. 12

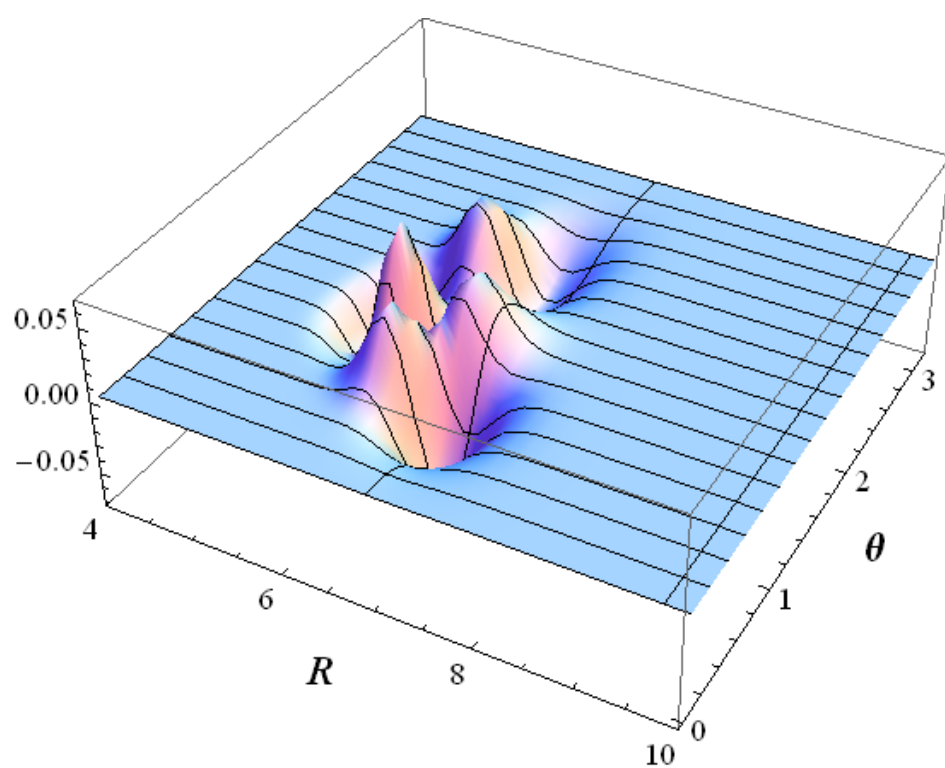

Figure S13. Eigenstate No. 13

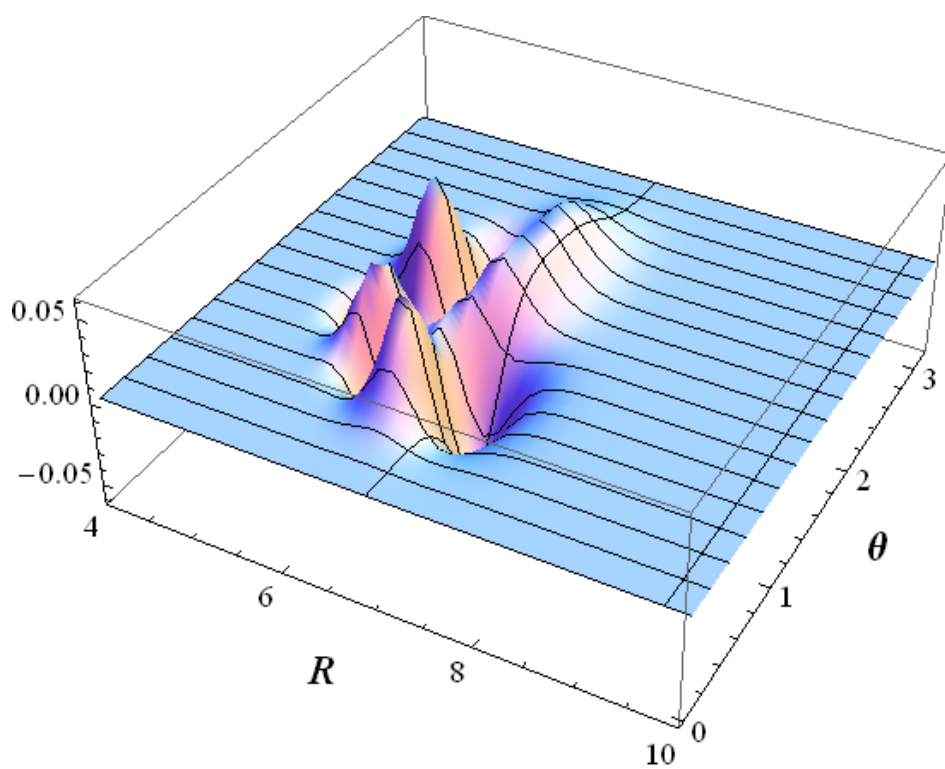

Figure S14. Eigenstate No. 14

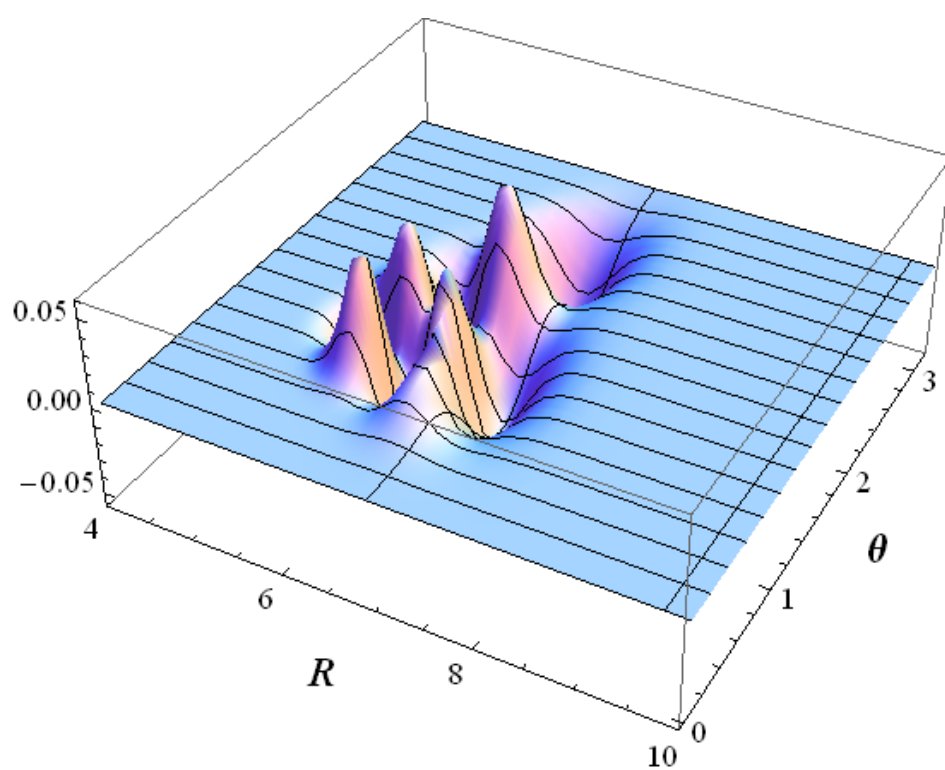

Figure S15. Eigenstate No. 15

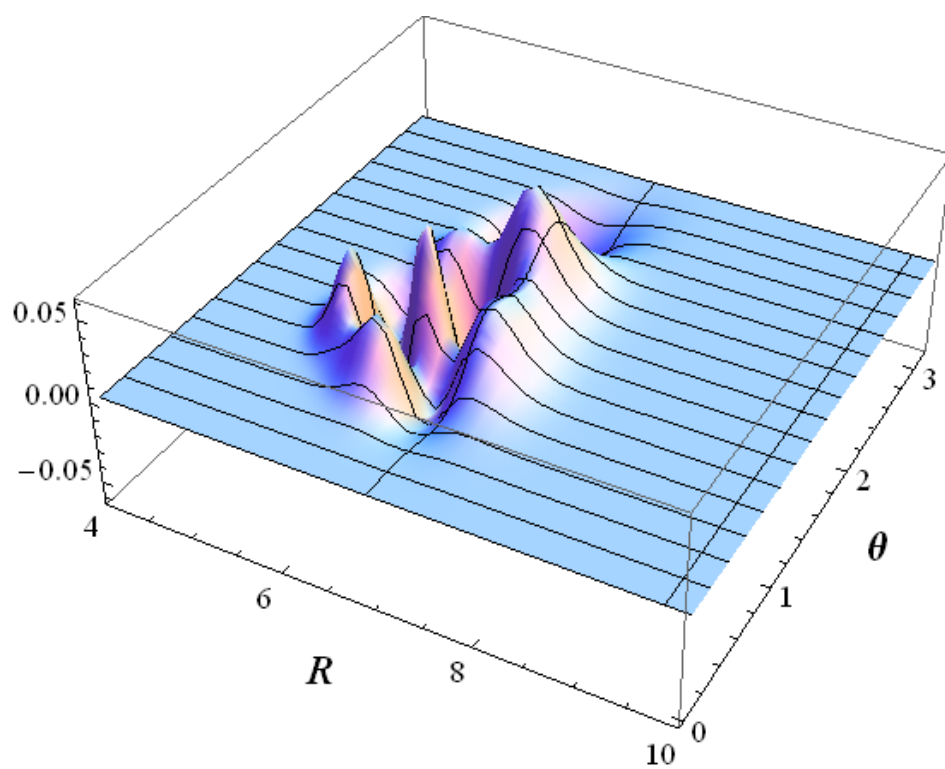

Figure S16. Eigenstate No. 16

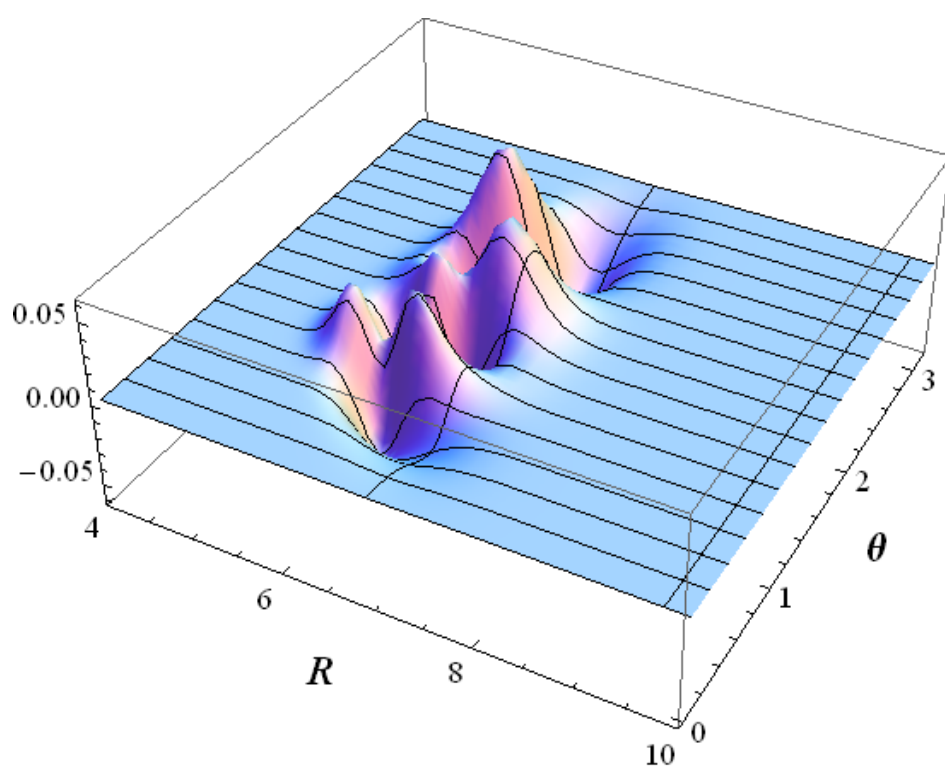

Figure S17. Eigenstate No. 17

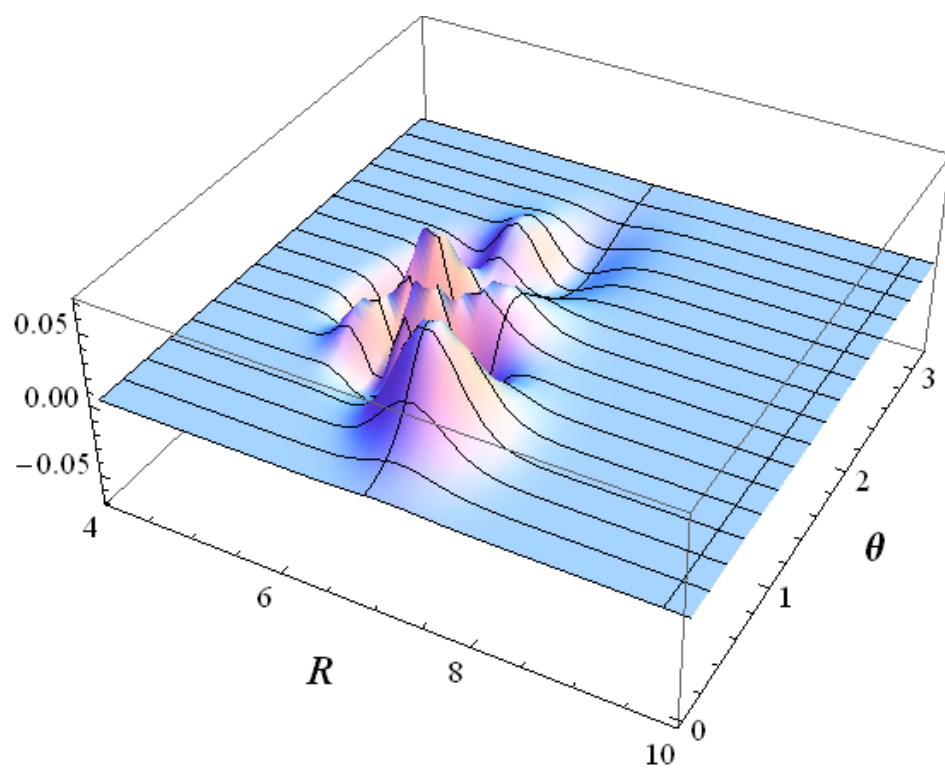

Figure S18. Eigenstate No. 18

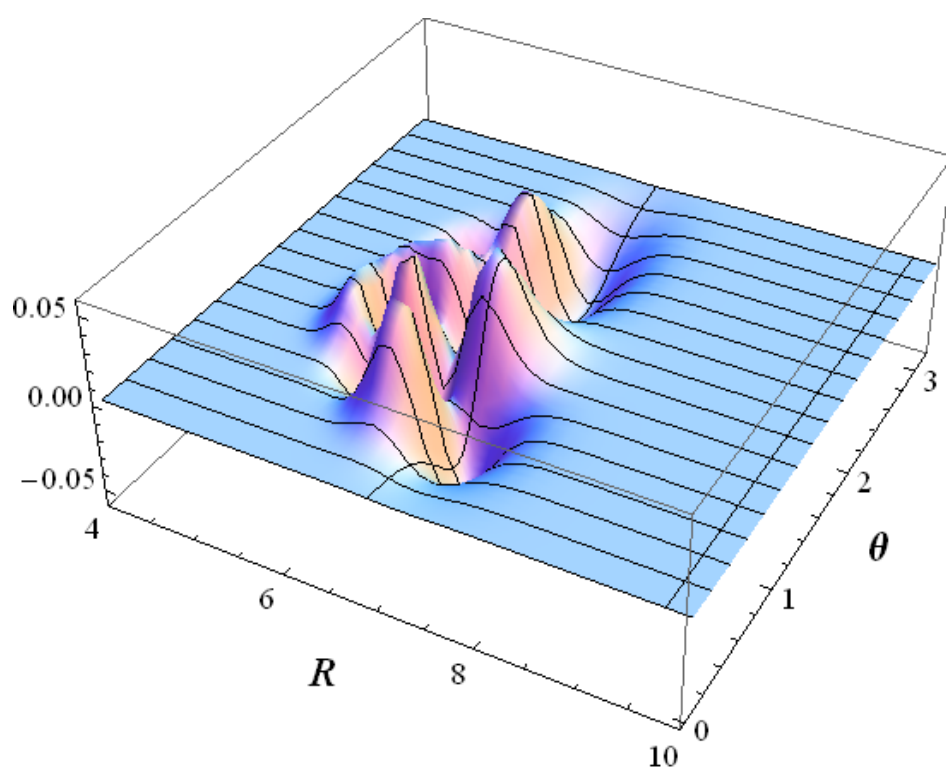

Figure S19. Eigenstate No. 19

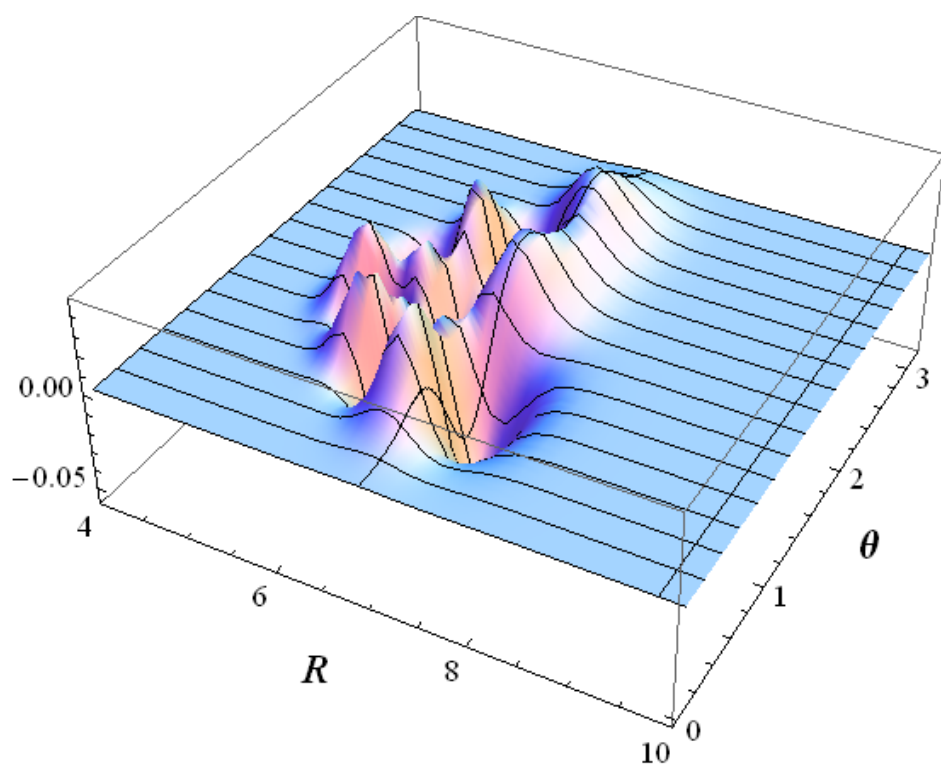

Figure S20. Eigenstate No. 20

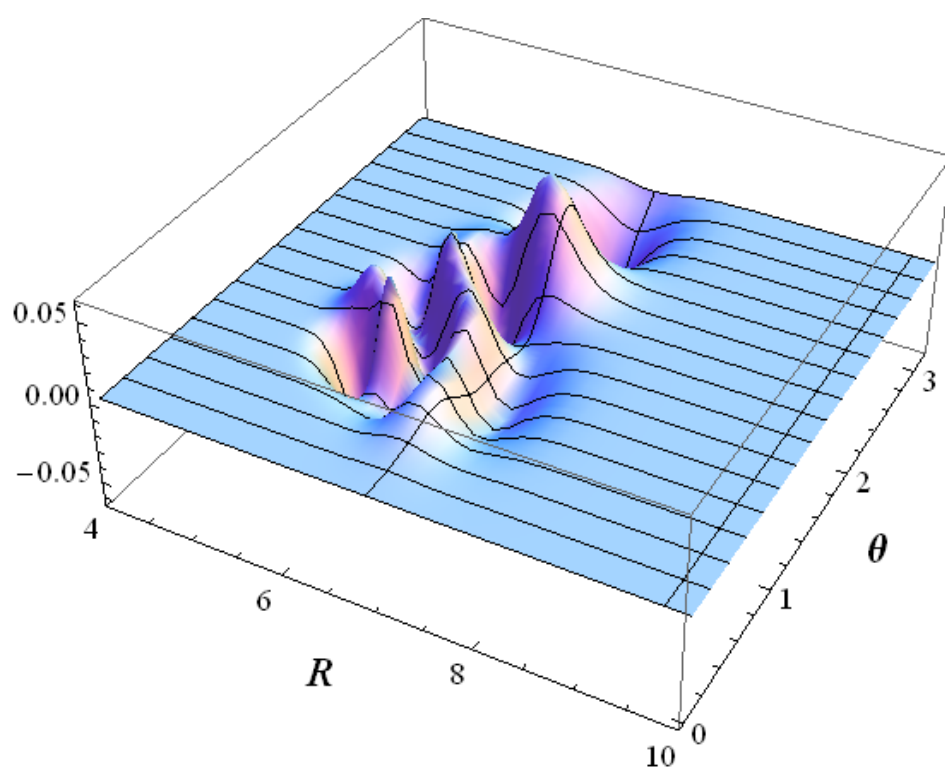

Figure S21. Eigenstate No. 21

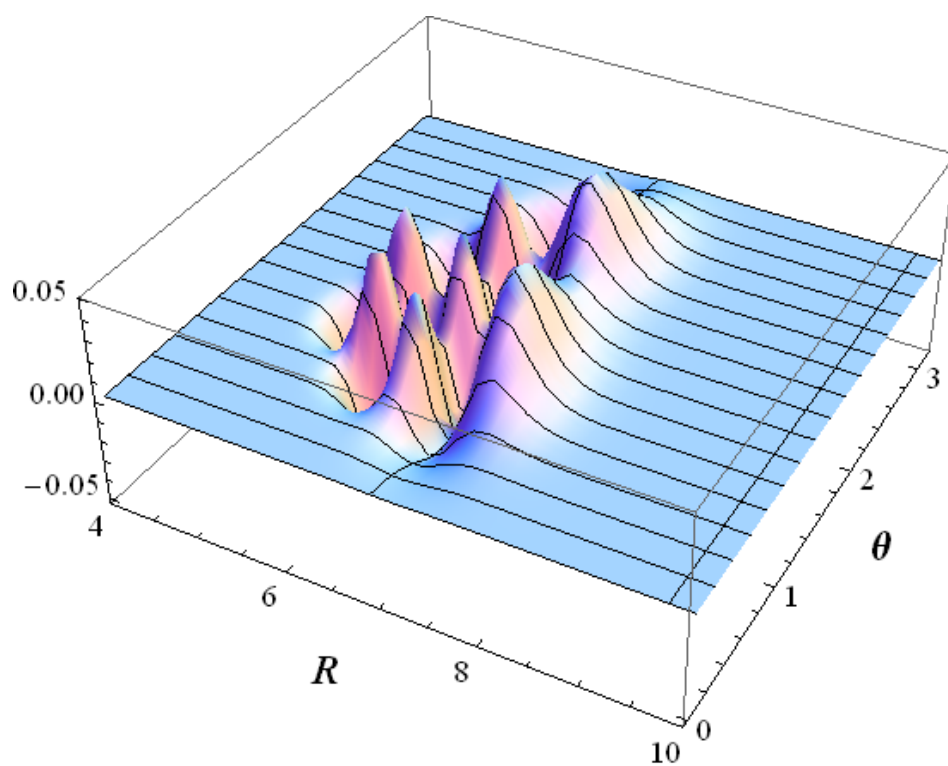

Figure S22. Eigenstate No. 22



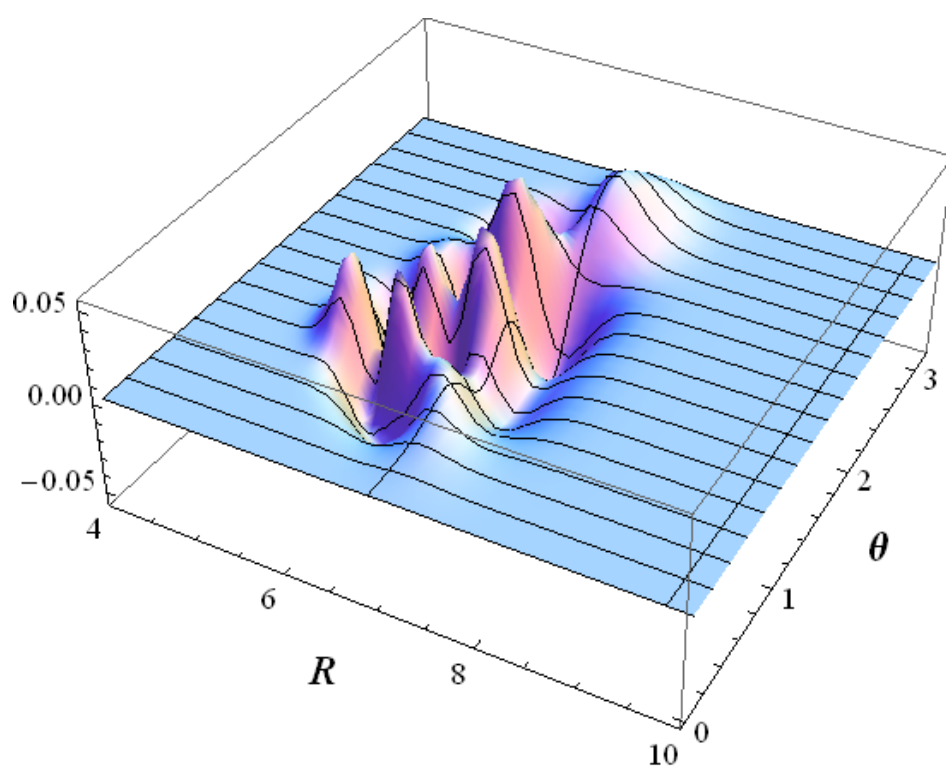

Figure S23. Eigenstate No. 23

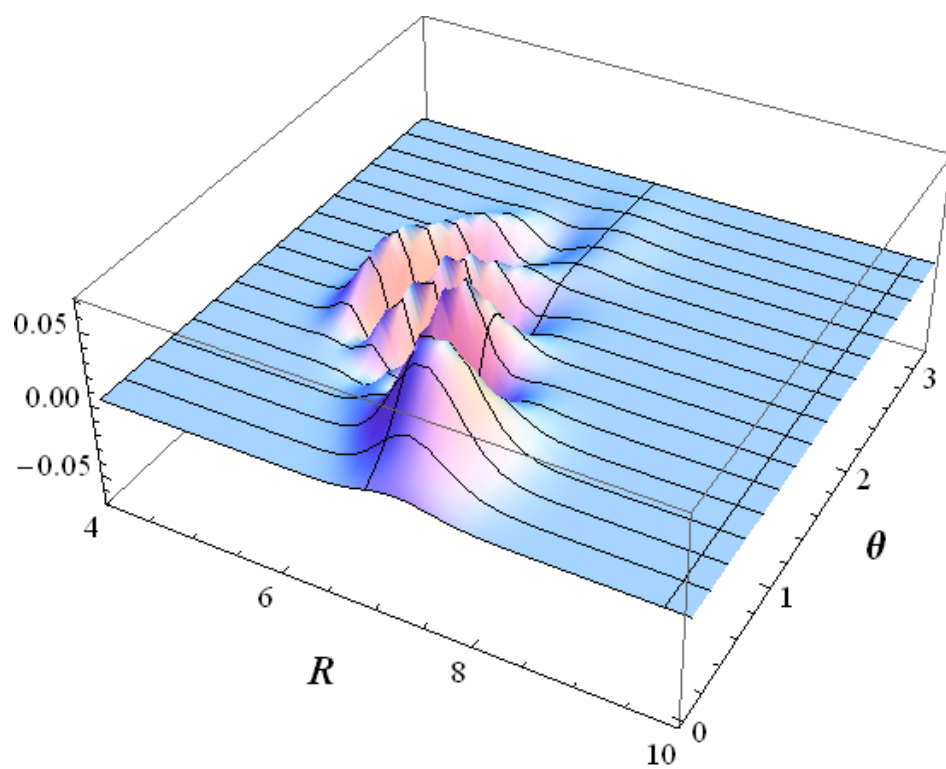

Figure S24. Eigenstate No. 24

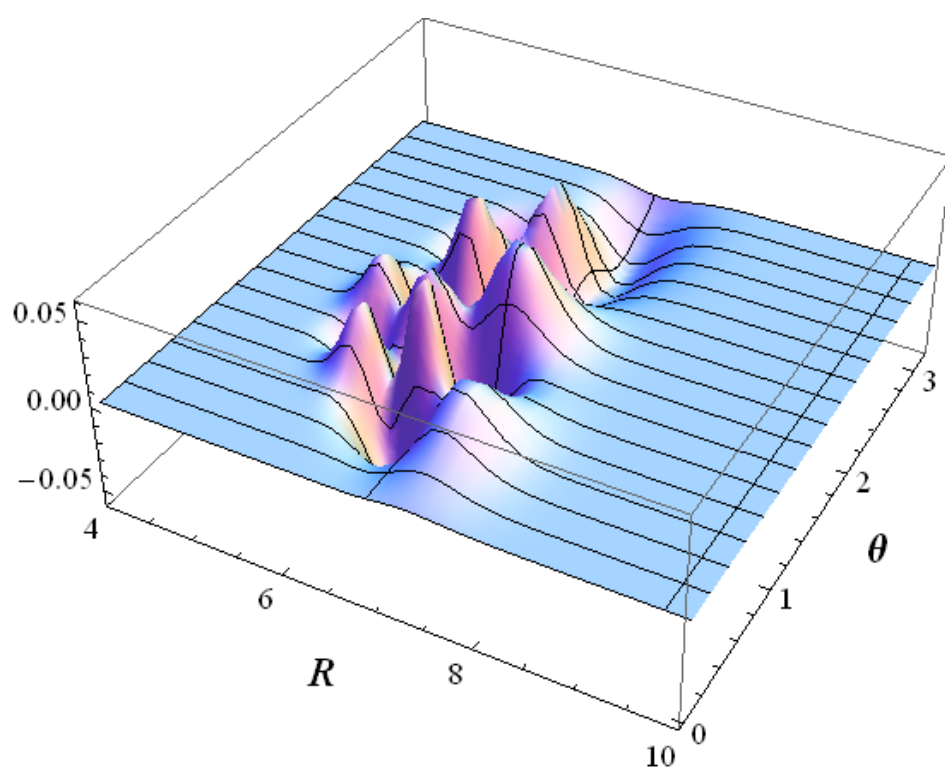

Figure S25. Eigenstate No. 25

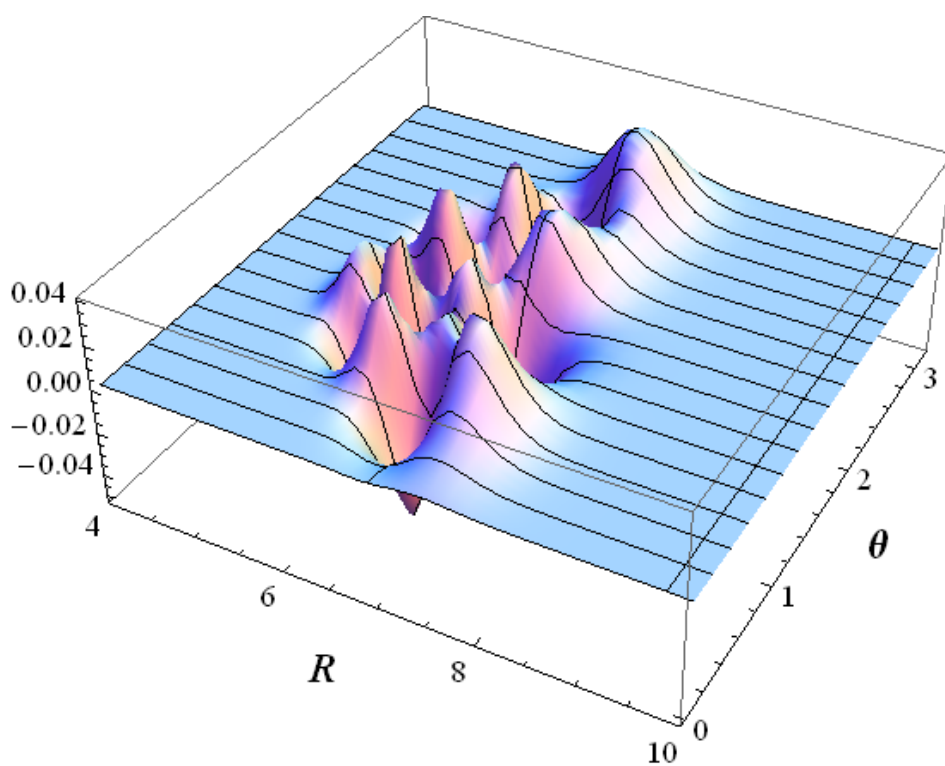

Figure S26. Eigenstate No. 26

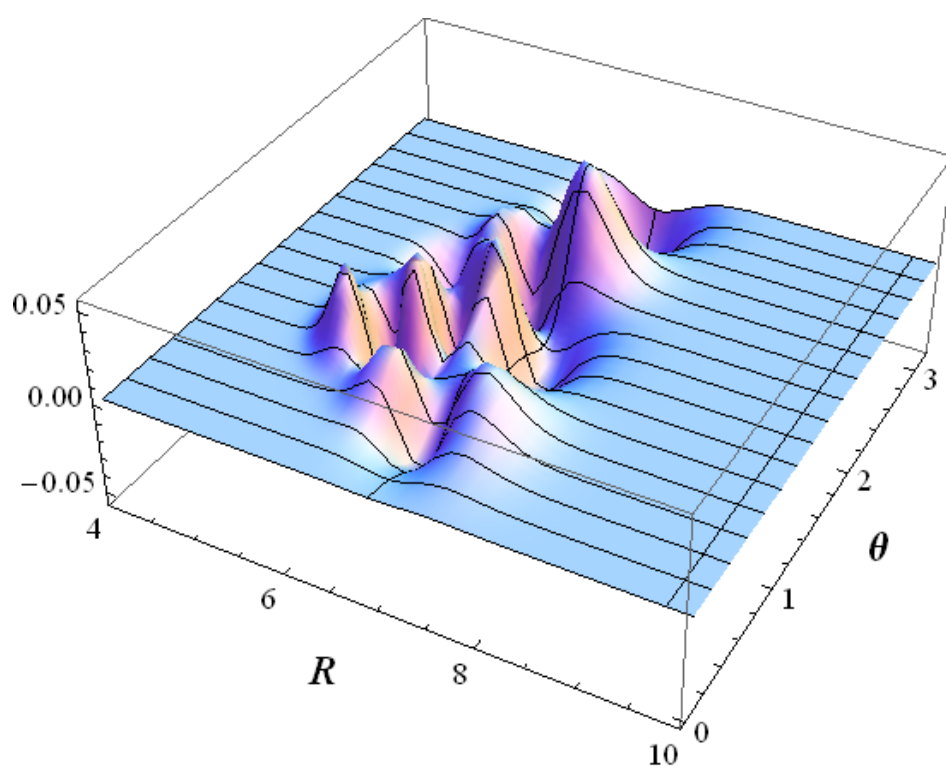

Figure S27. Eigenstate No. 27

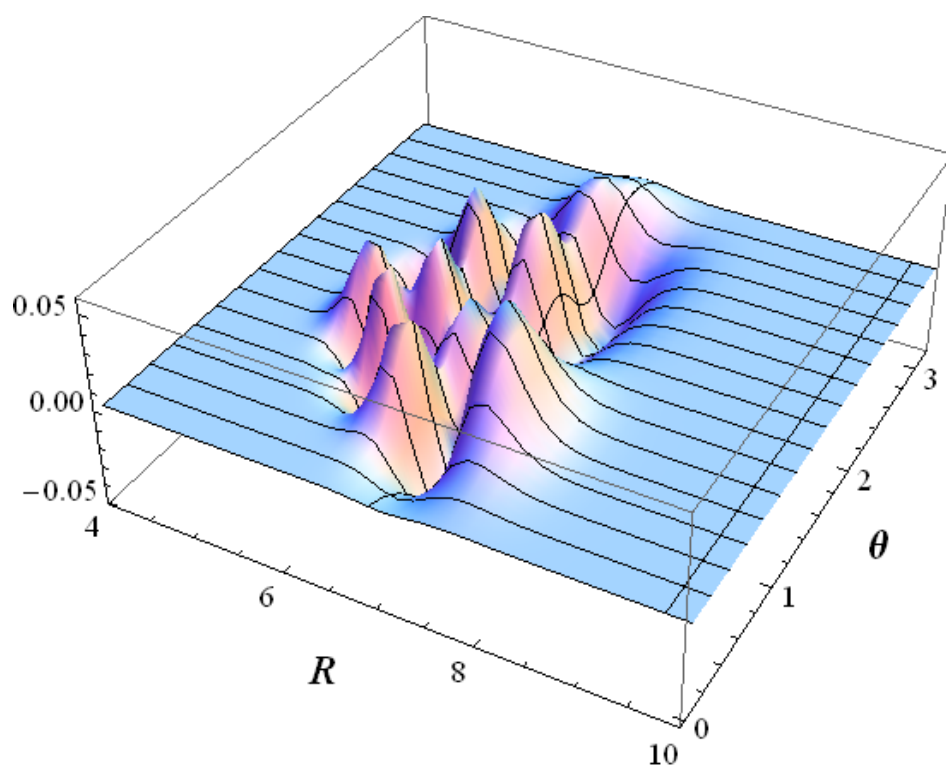

Figure S28. Eigenstate No. 28

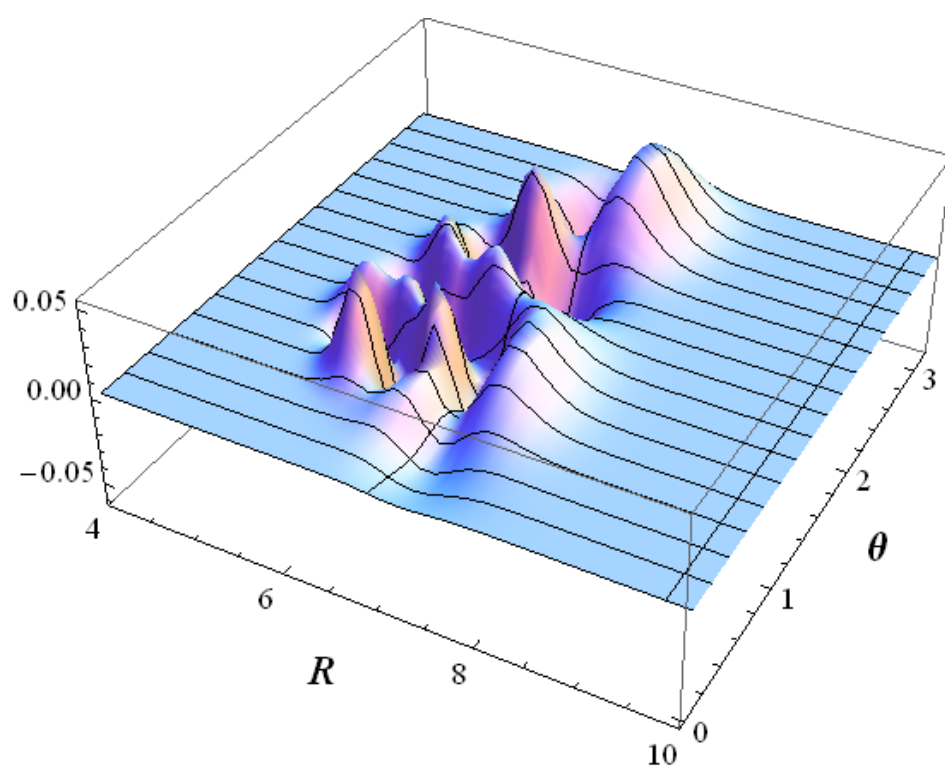

Figure S29. Eigenstate No. 29

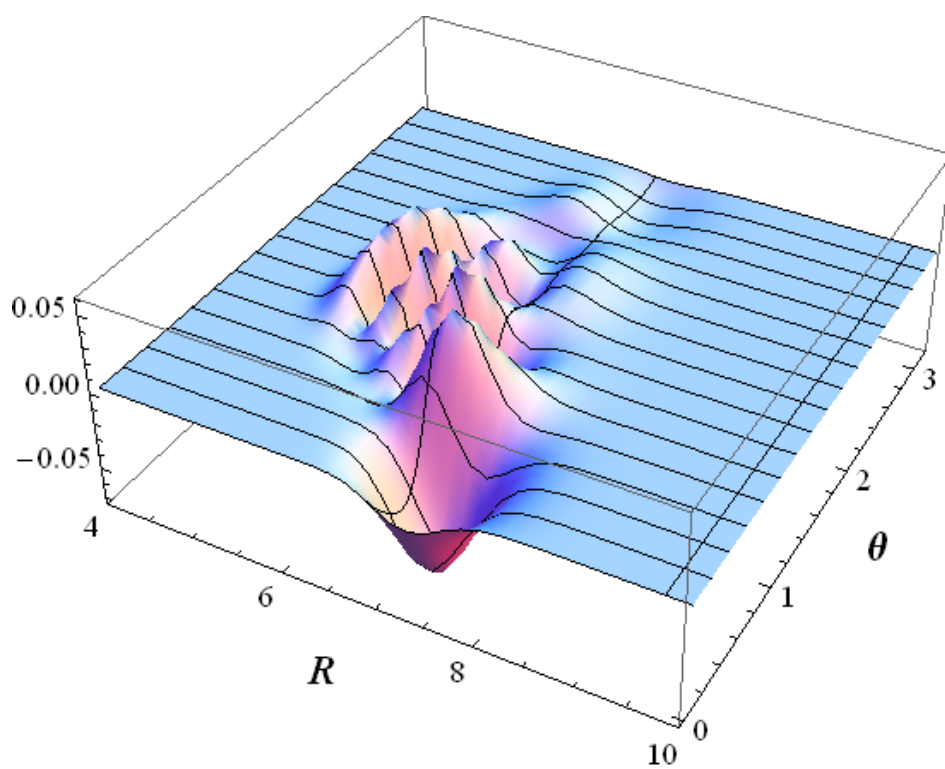

Figure S30. Eigenstate No. 30

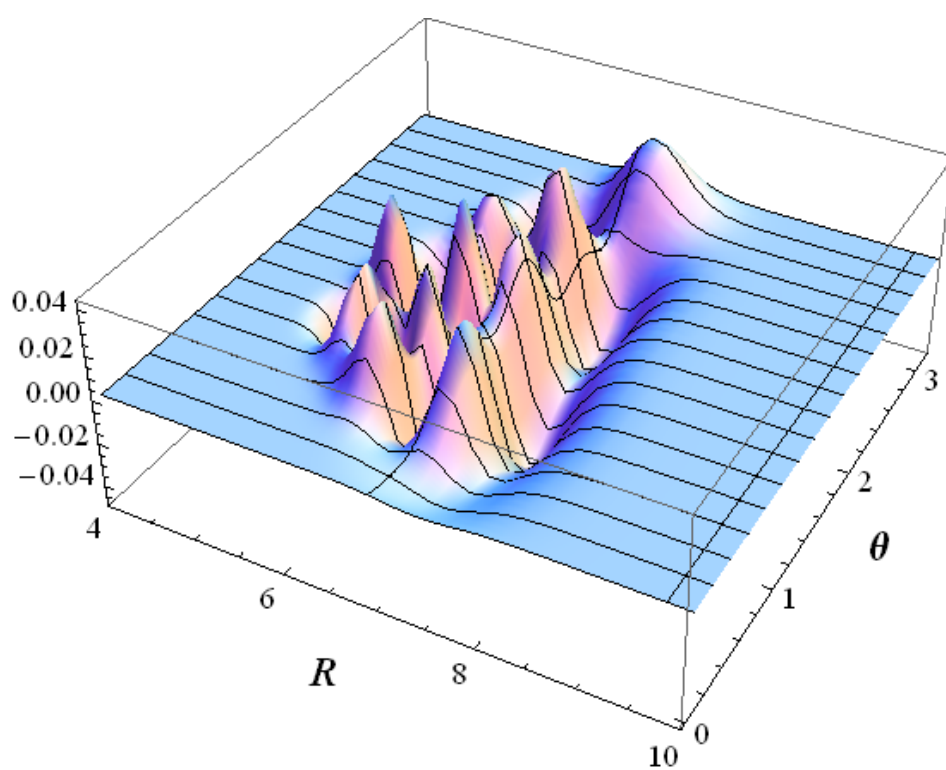

Figure S31. Eigenstate No. 31

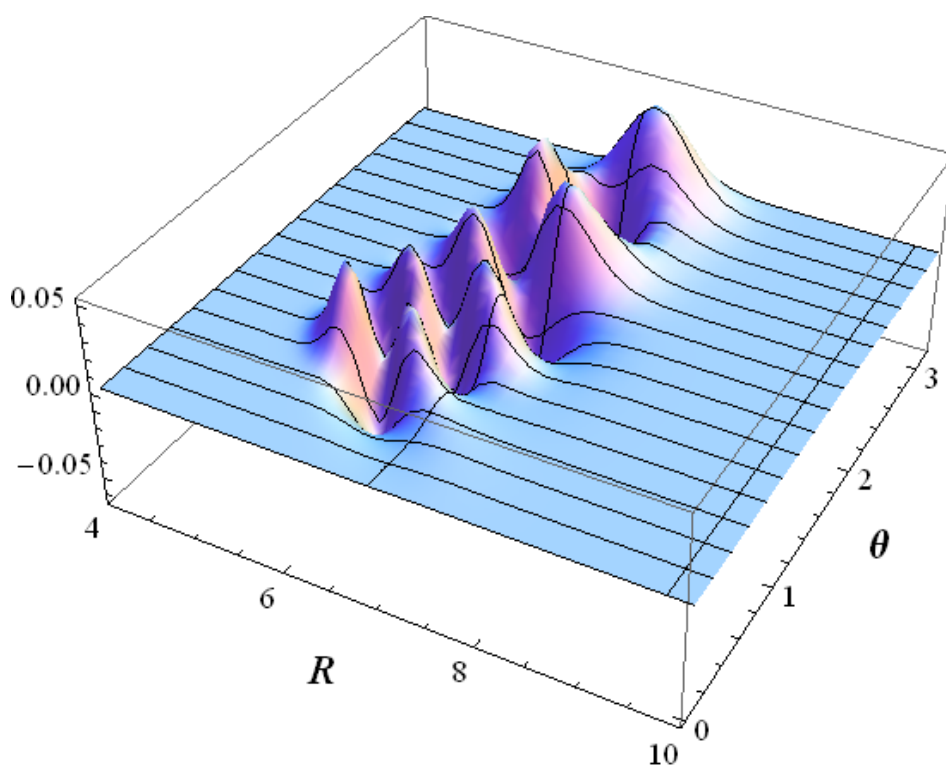

Figure S32. Eigenstate No. 32

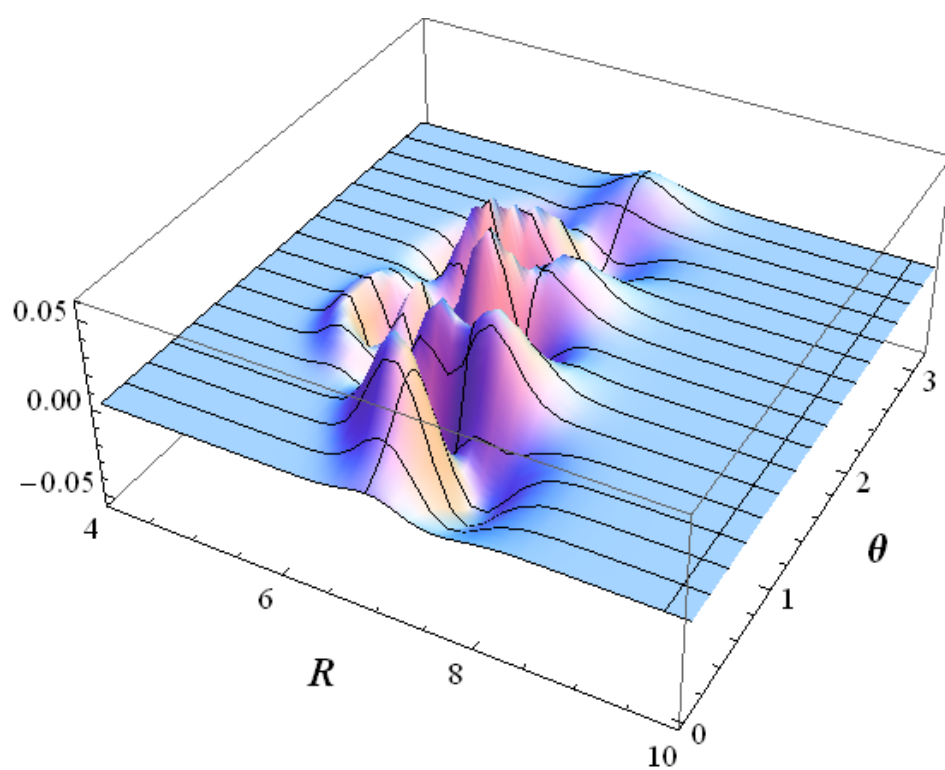

Figure S33. Eigenstate No. 33

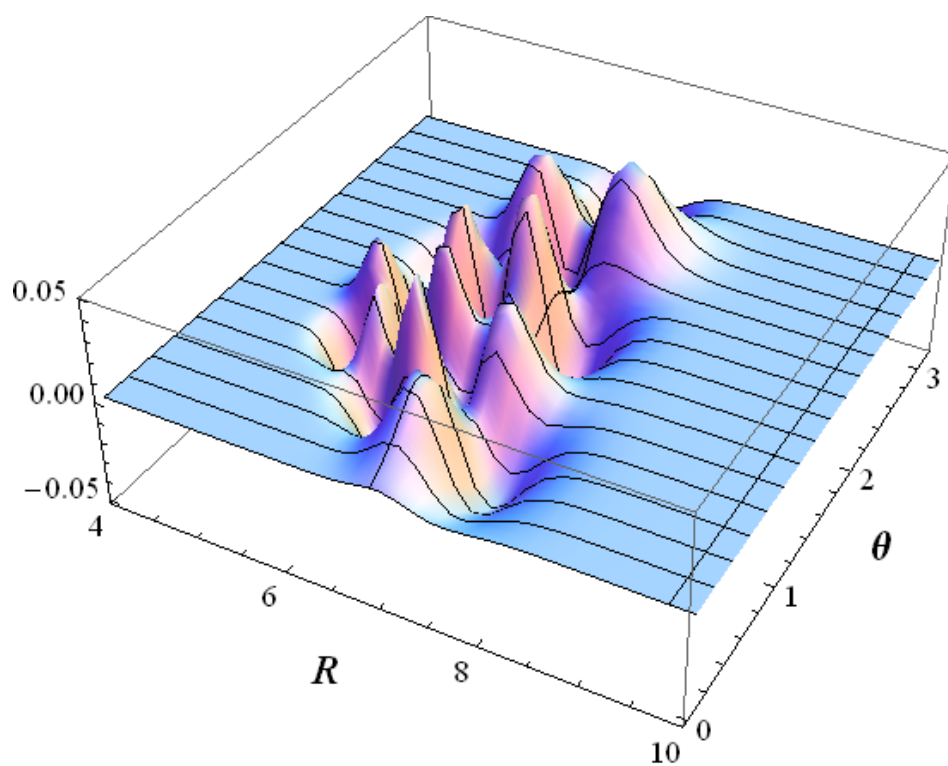

Figure S34. Eigenstate No. 34

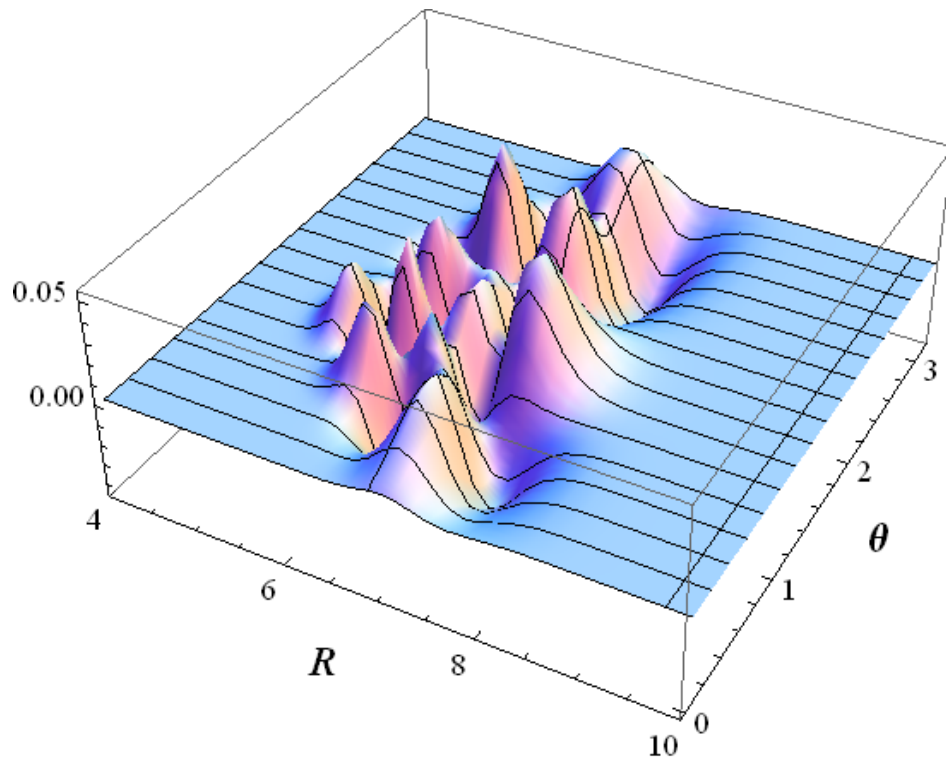

Figure S35. Eigenstate No. 35

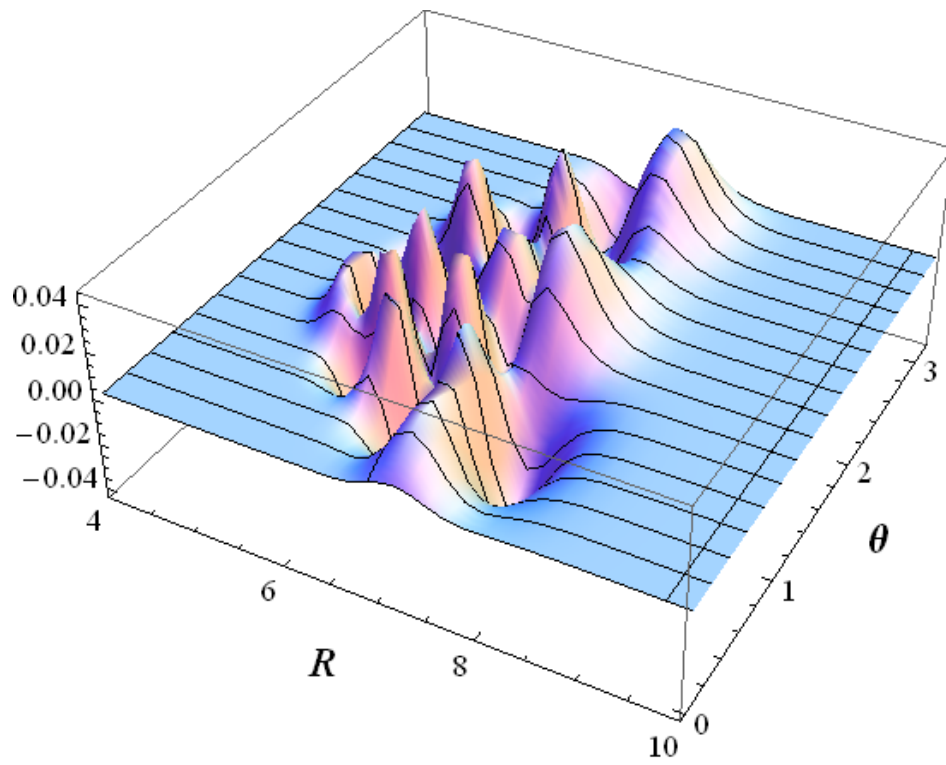

Figure S36. Eigenstate No. 36



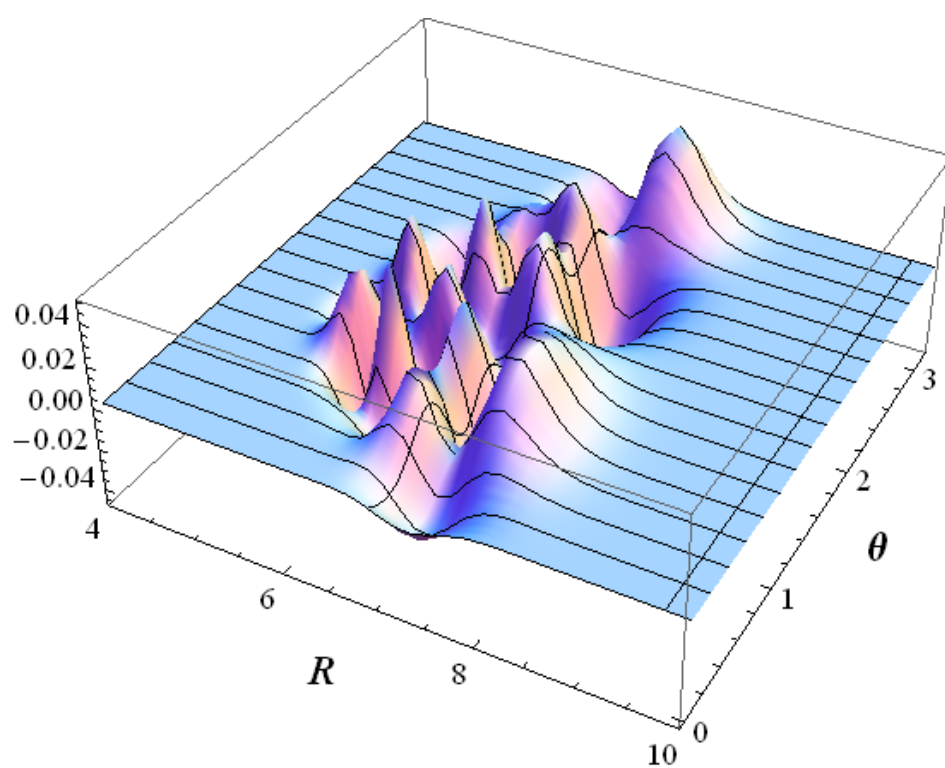

Figure S37. Eigenstate No. 37

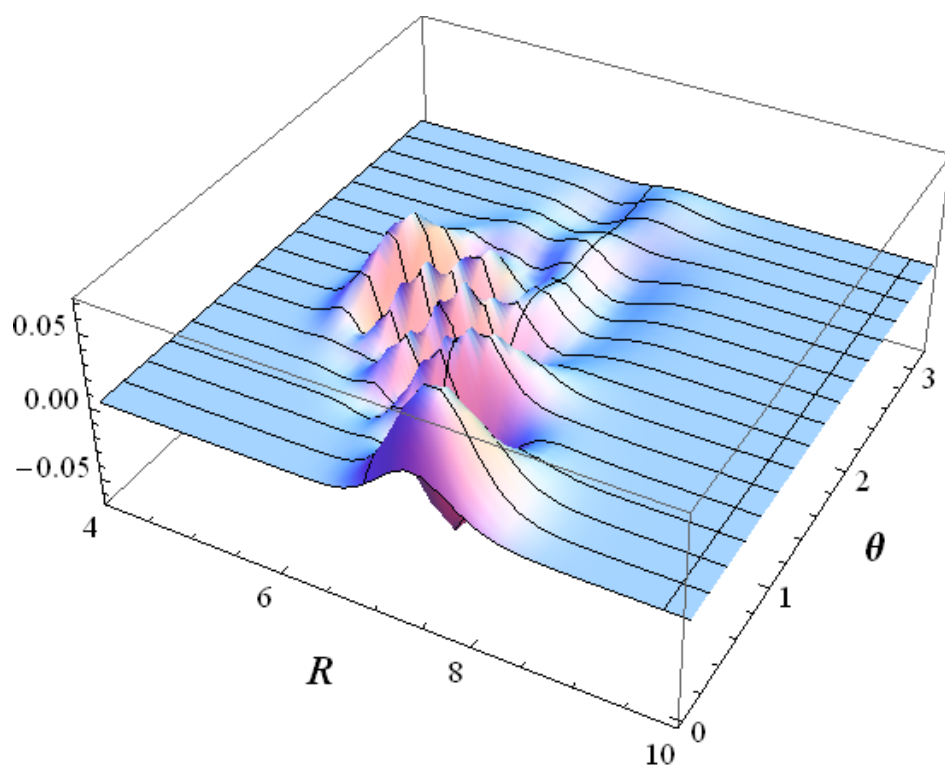

Figure S38. Eigenstate No. 38



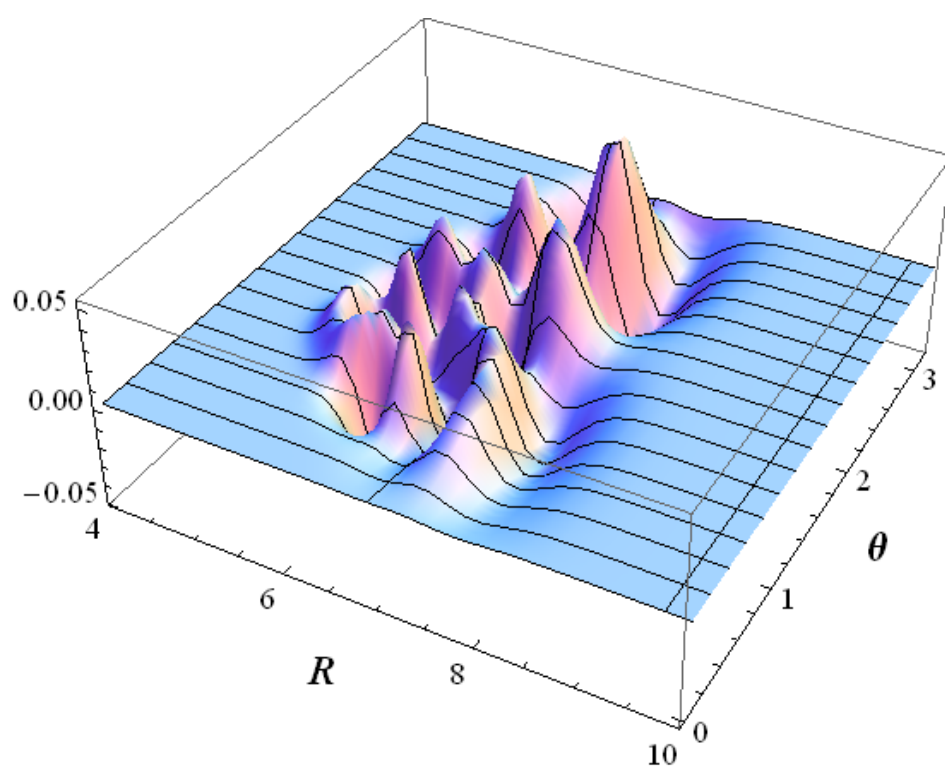

Figure S39. Eigenstate No. 39

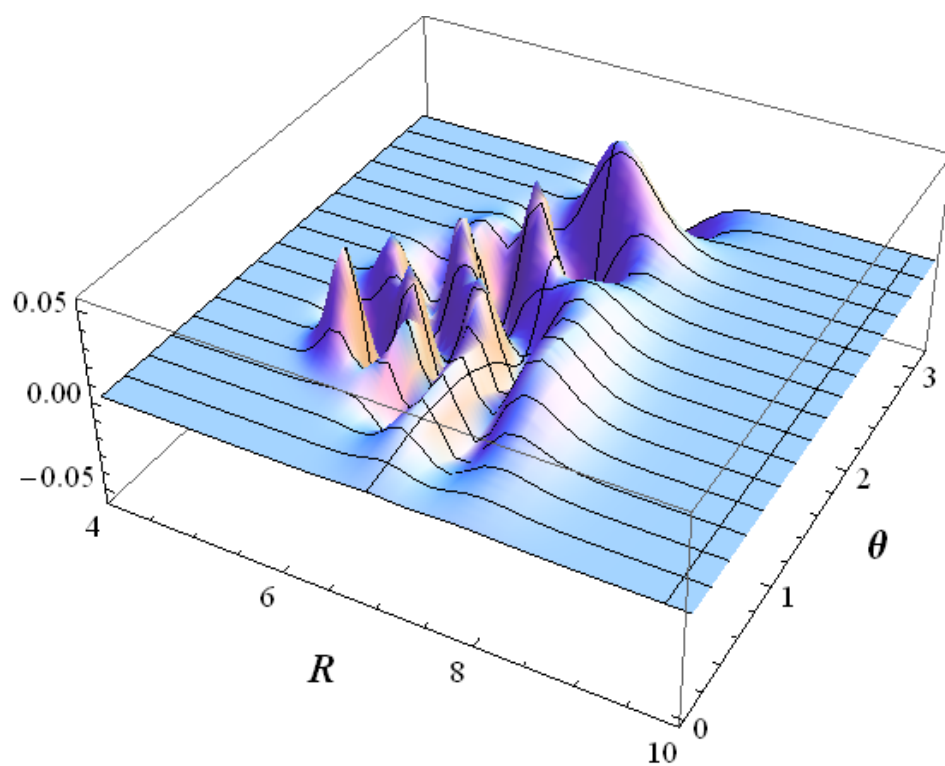

Figure S40. Eigenstate No. 40

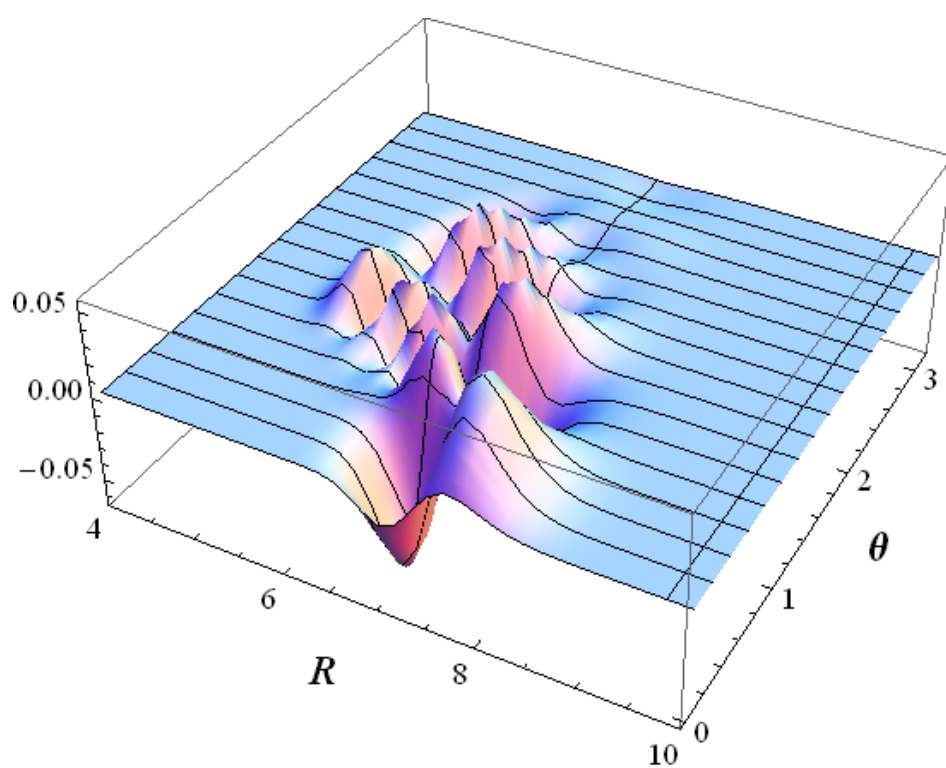

Figure S41. Eigenstate No. 41

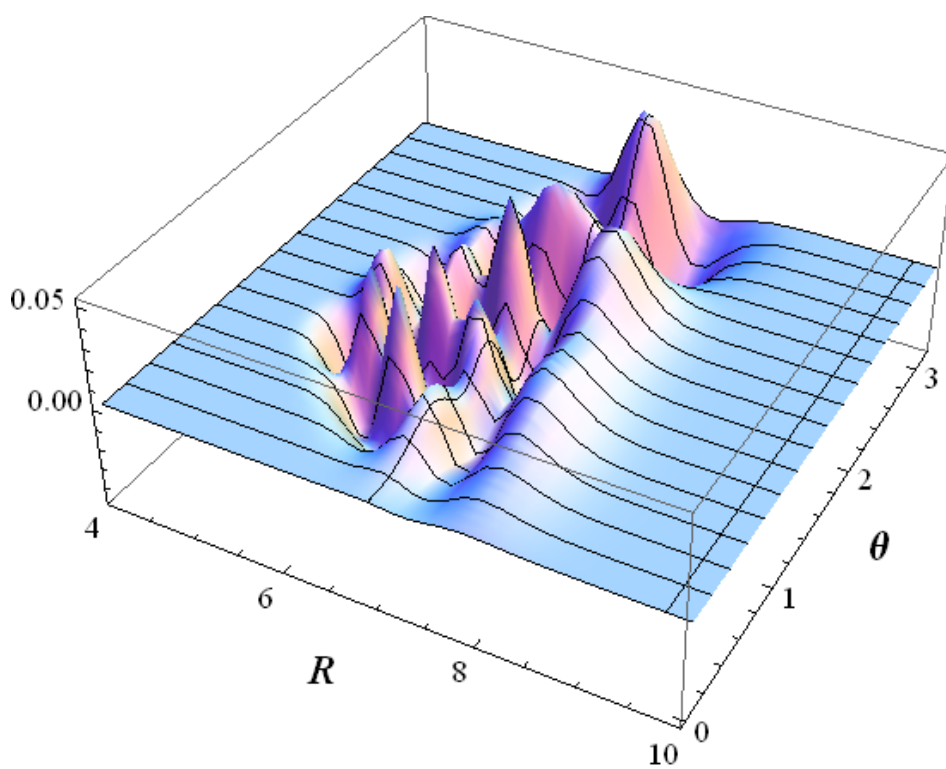

Figure S42. Eigenstate No. 42

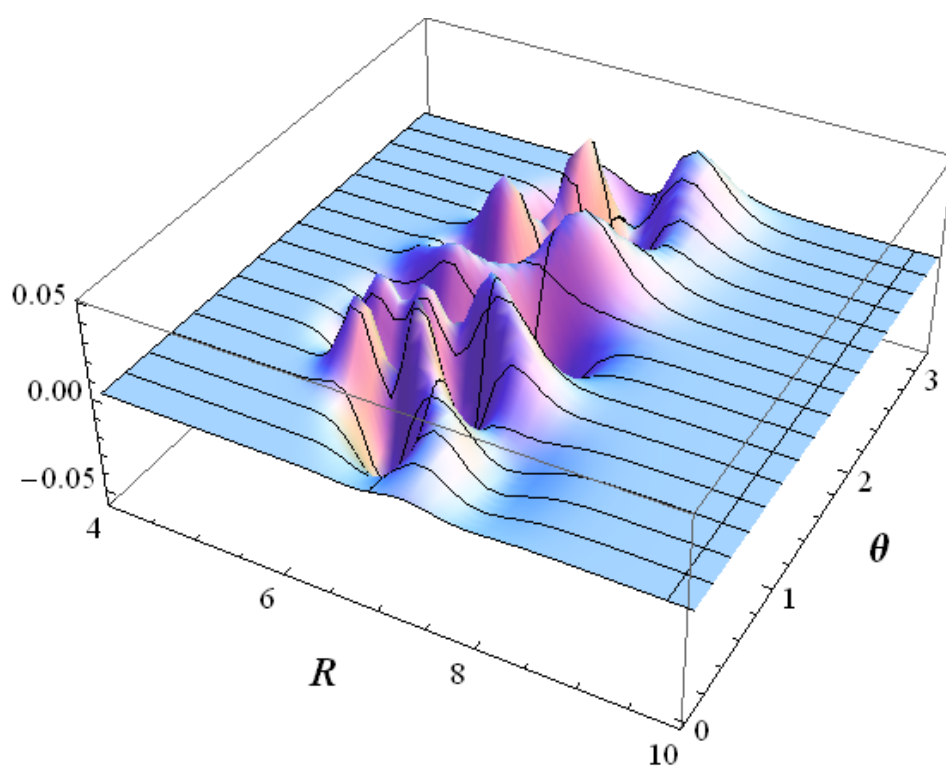

Figure S43. Eigenstate No. 43

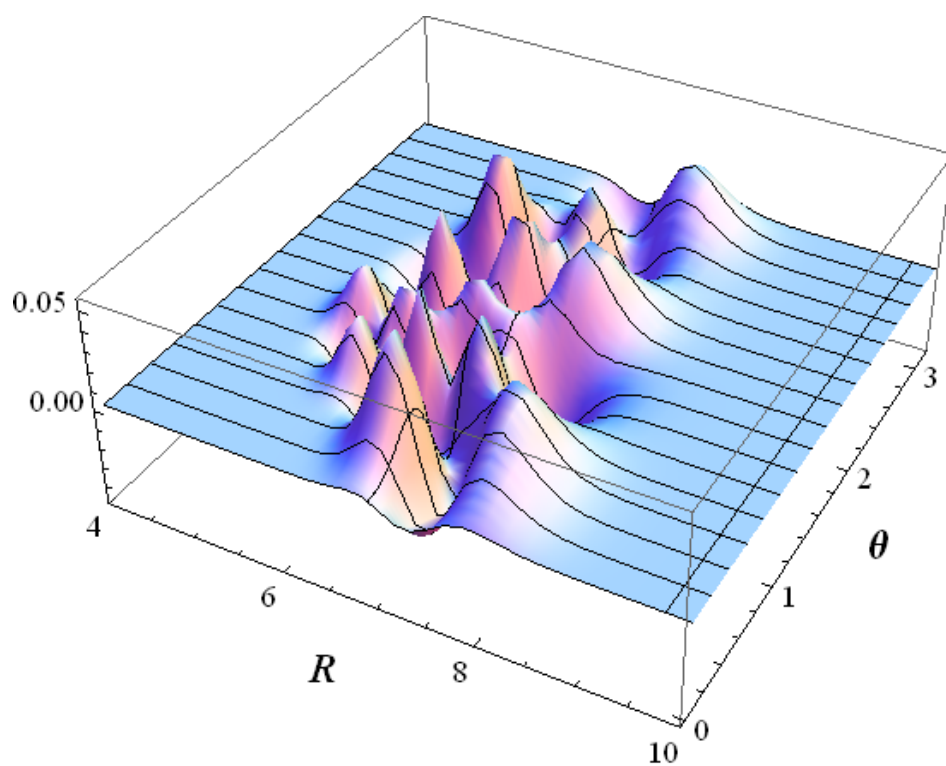

Figure S44. Eigenstate No. 44

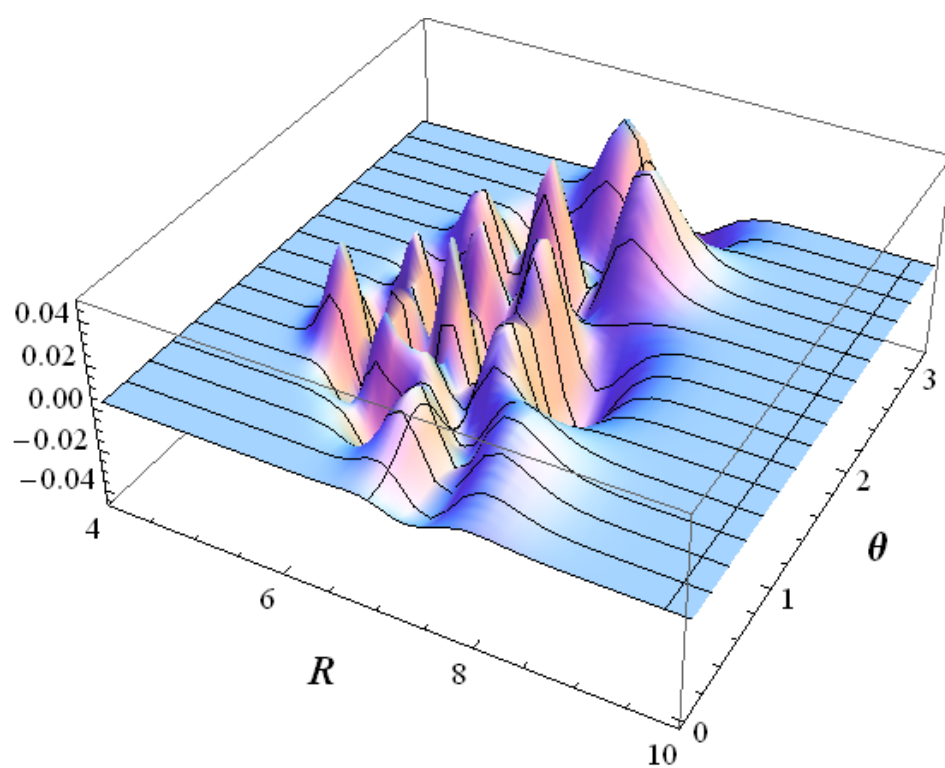

Figure S45. Eigenstate No. 45

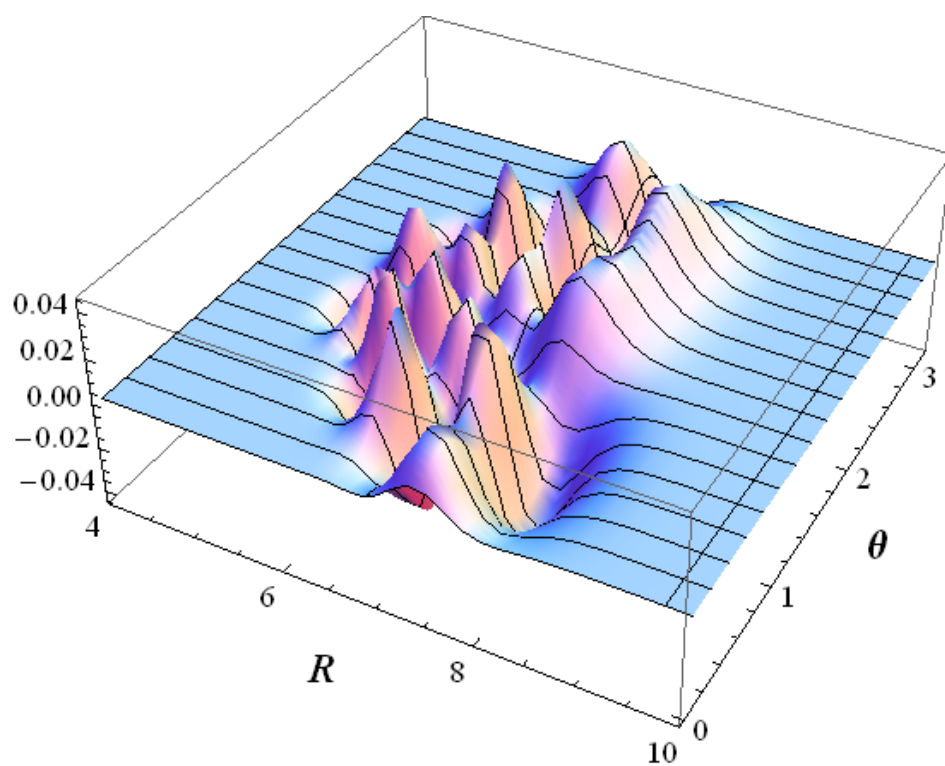

Figure S46. Eigenstate No. 46

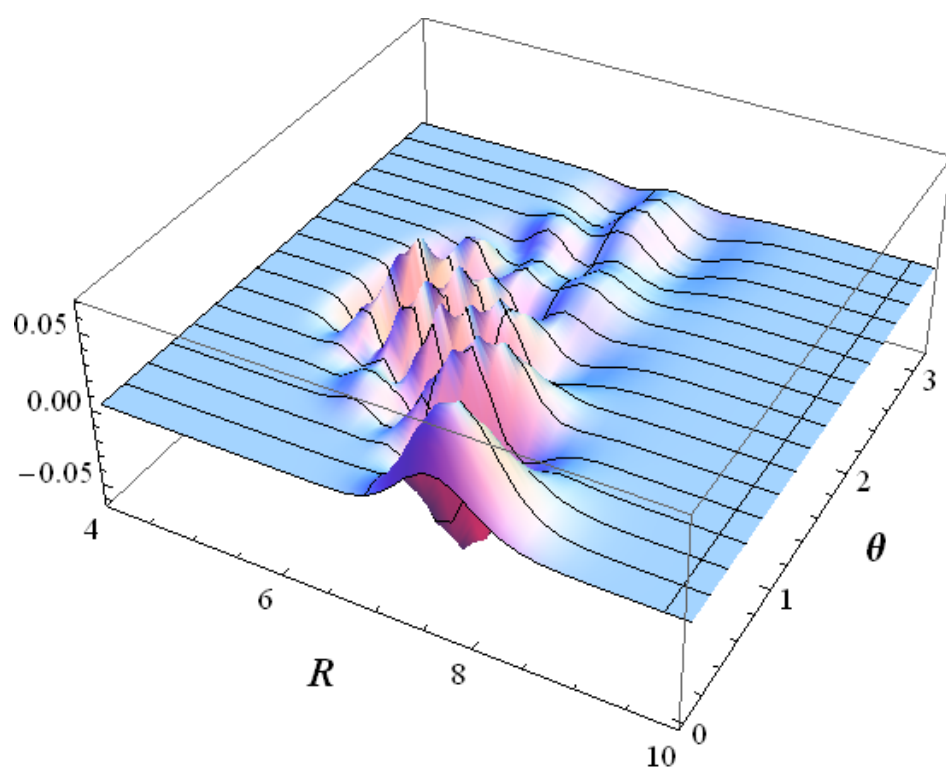

Figure S47. Eigenstate No. 47

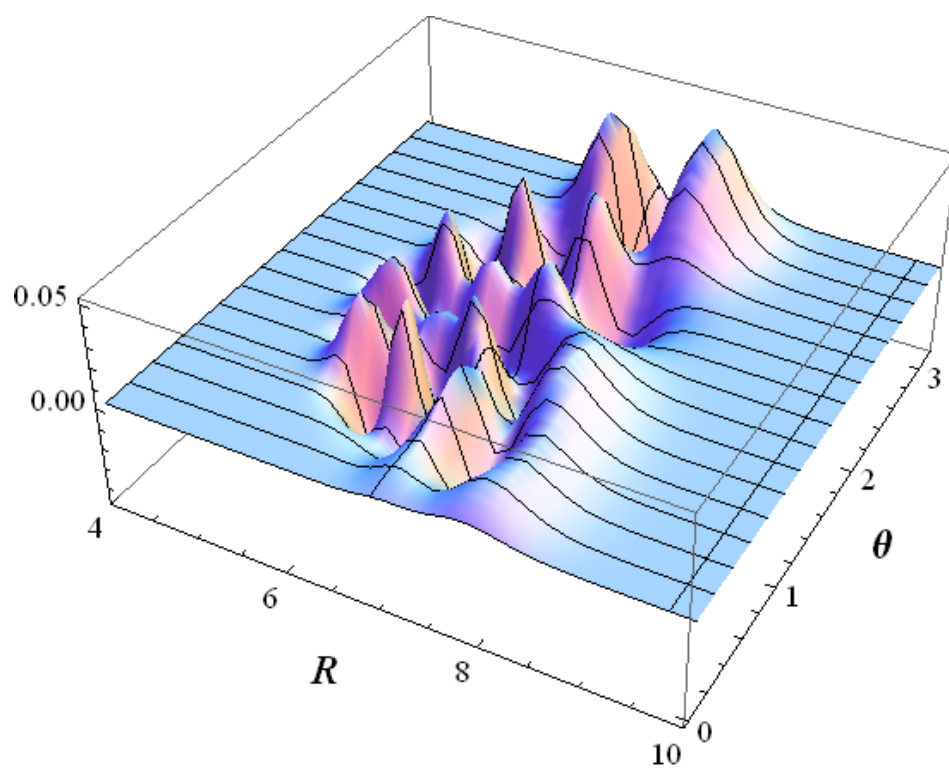

Figure S48. Eigenstate No. 48

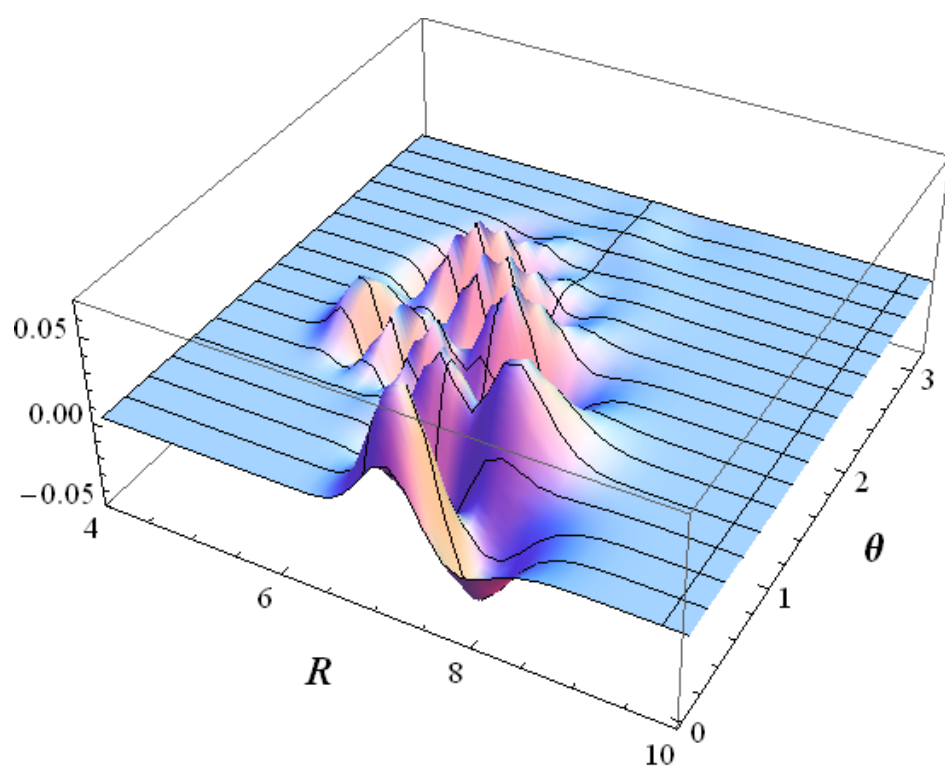

Figure S49. Eigenstate No. 49

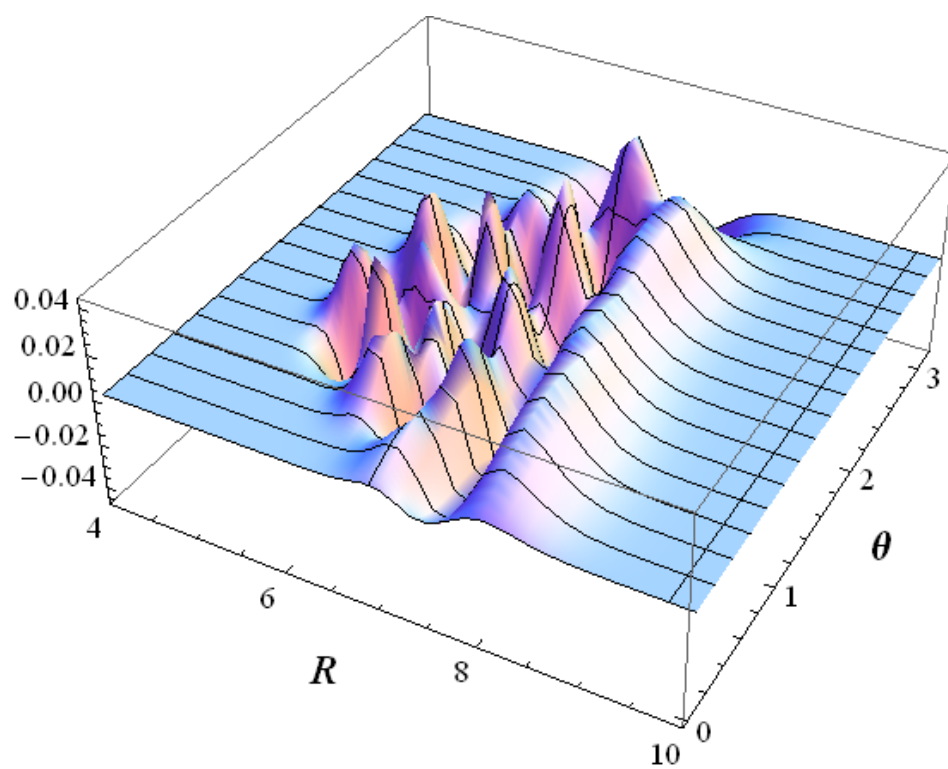

Figure S50. Eigenstate No. 50



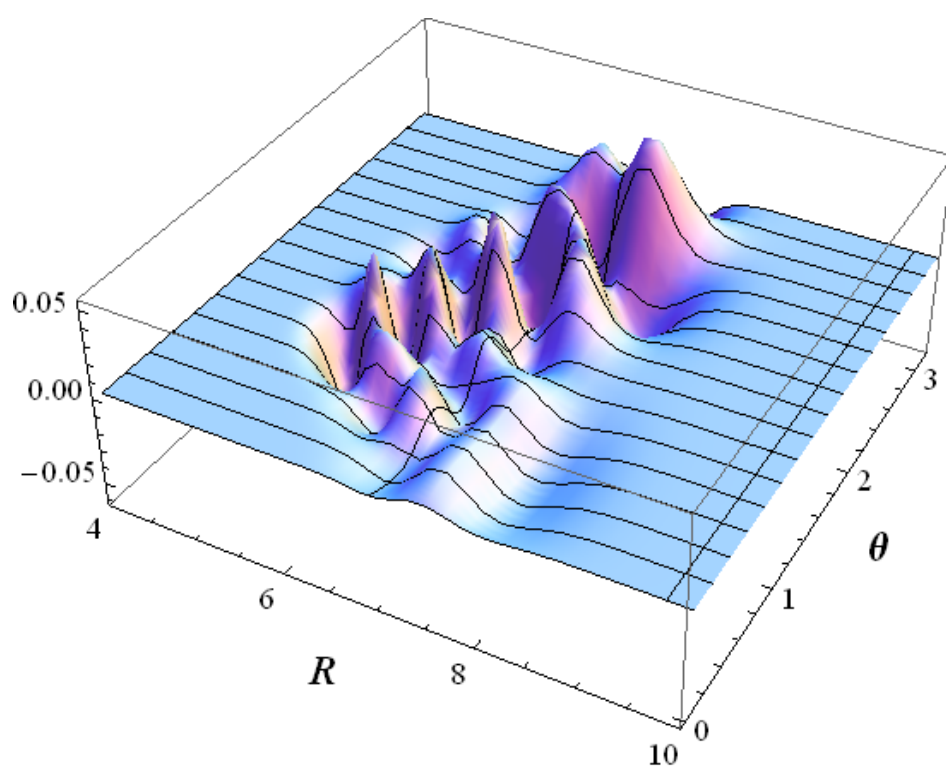

Figure S51. Eigenstate No. 51

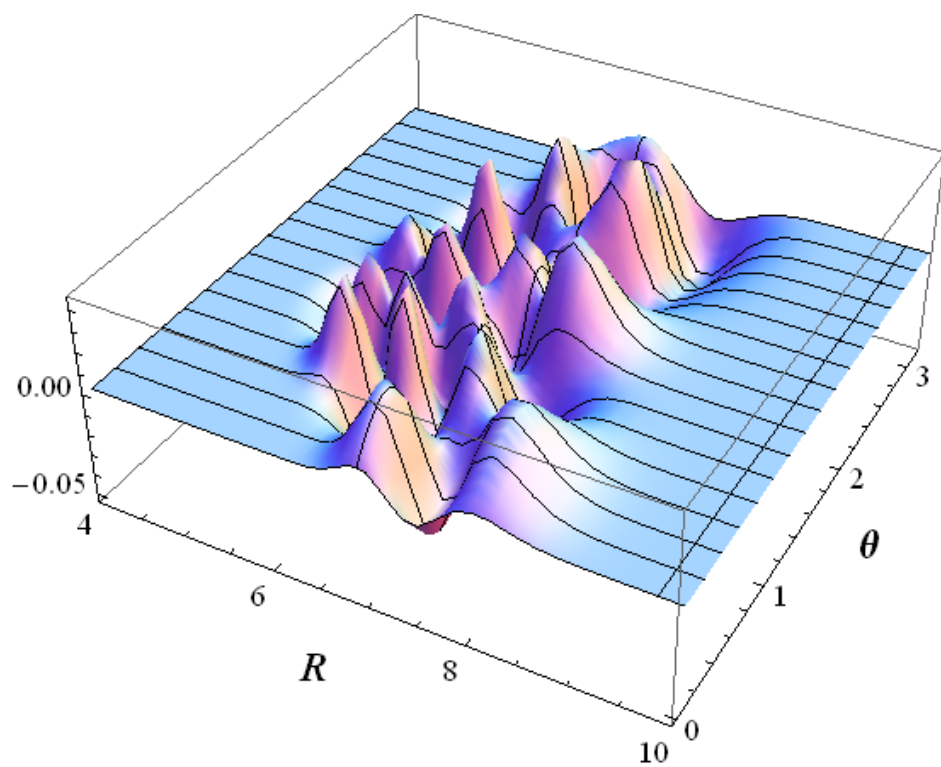

Figure S52. Eigenstate No. 52

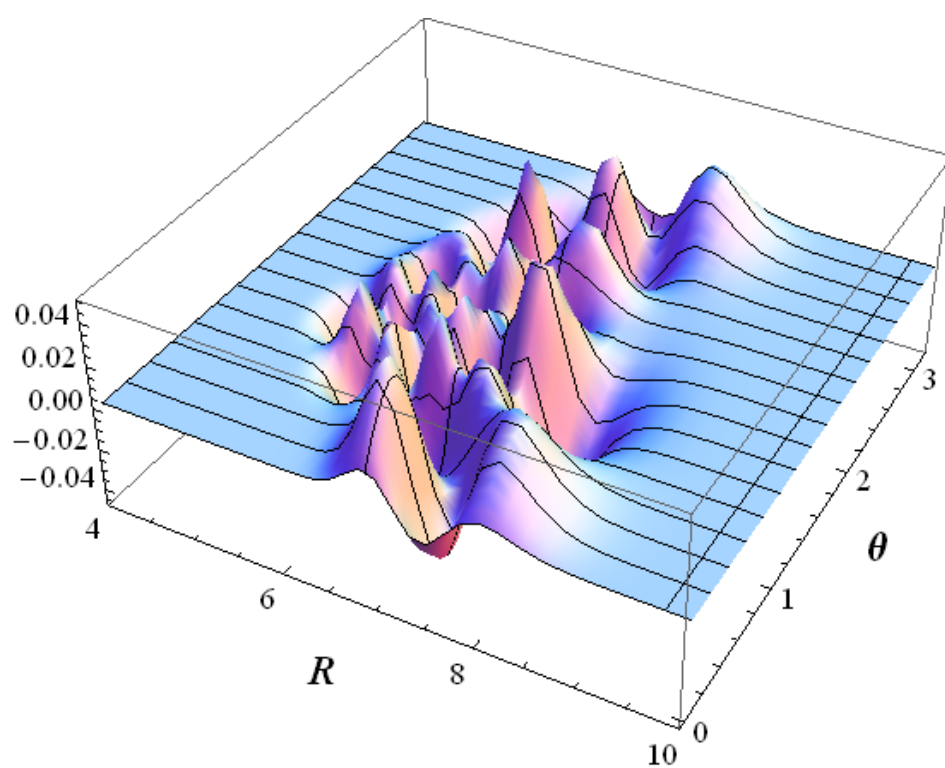

Figure S53. Eigenstate No. 53

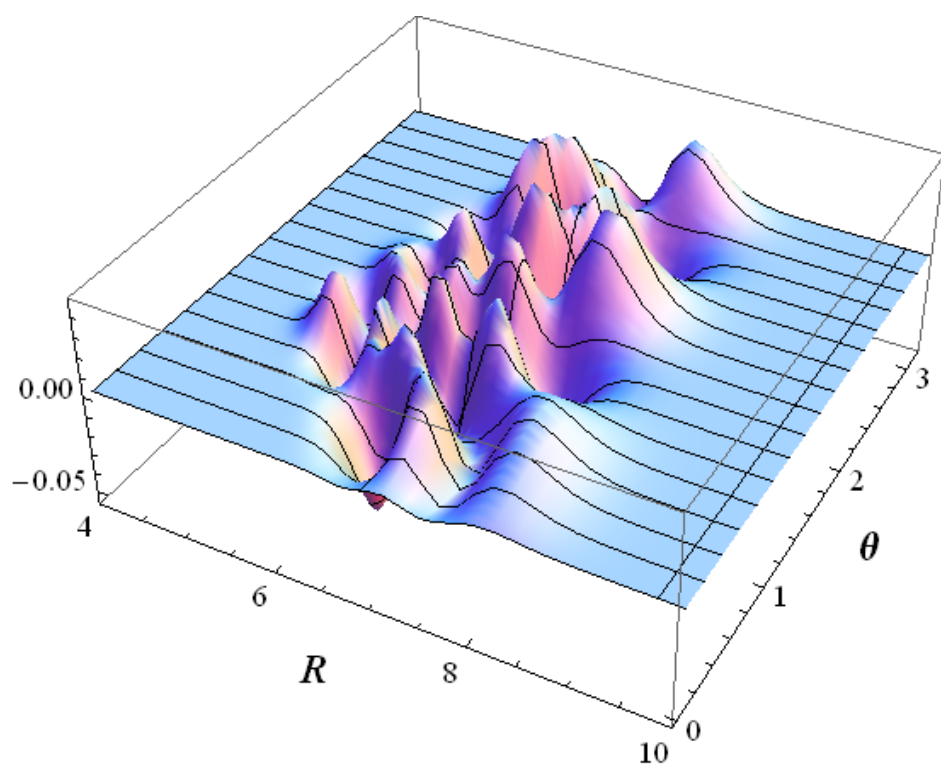

Figure S54. Eigenstate No. 54



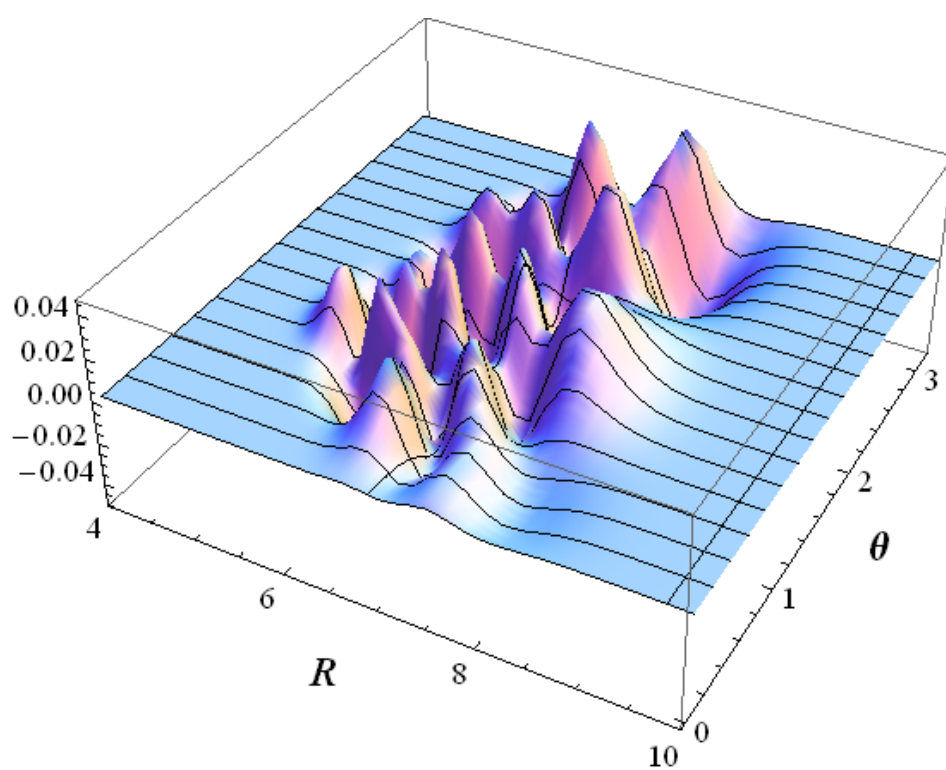

Figure S55. Eigenstate No. 55

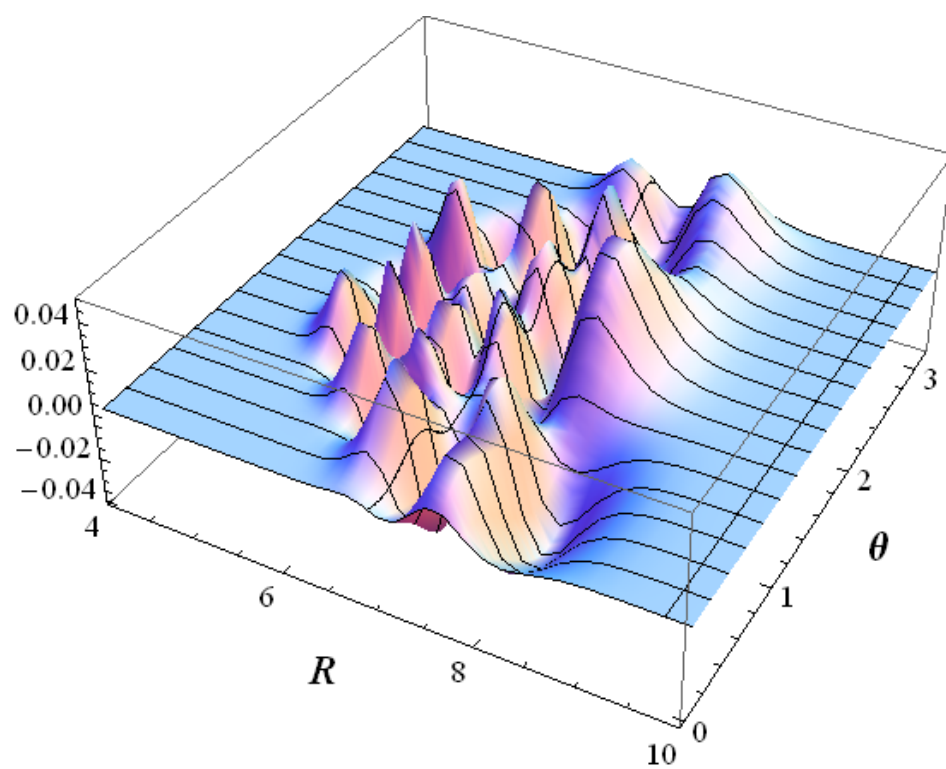

Figure S56. Eigenstate No. 56

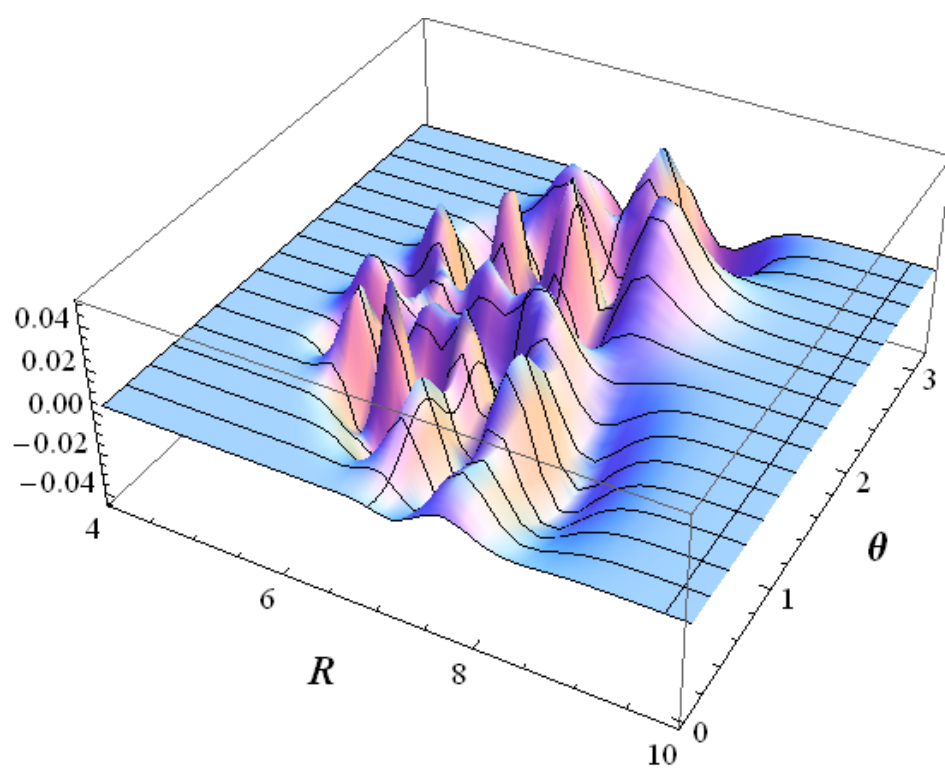

Figure S57. Eigenstate No. 57

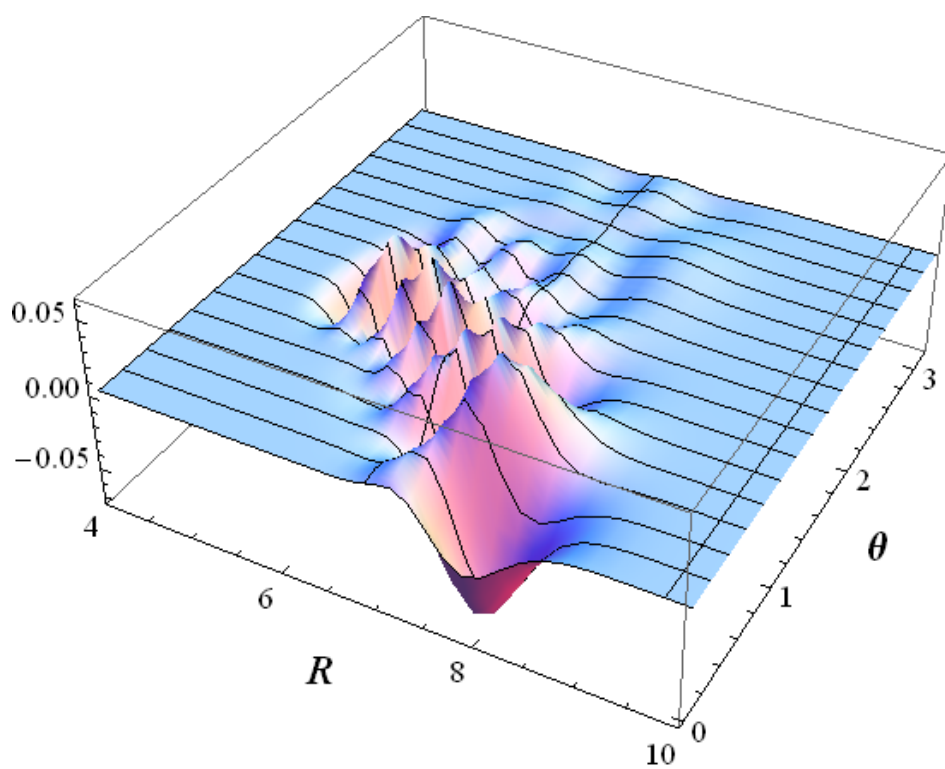

Figure S58. Eigenstate No. 58

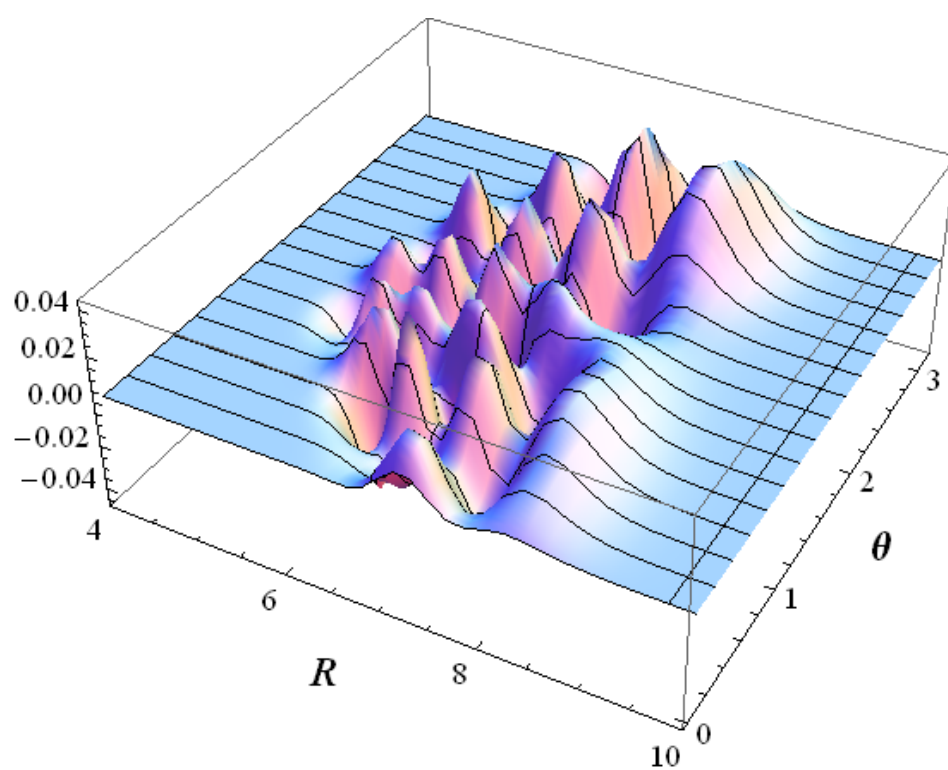

Figure S59. Eigenstate No. 59

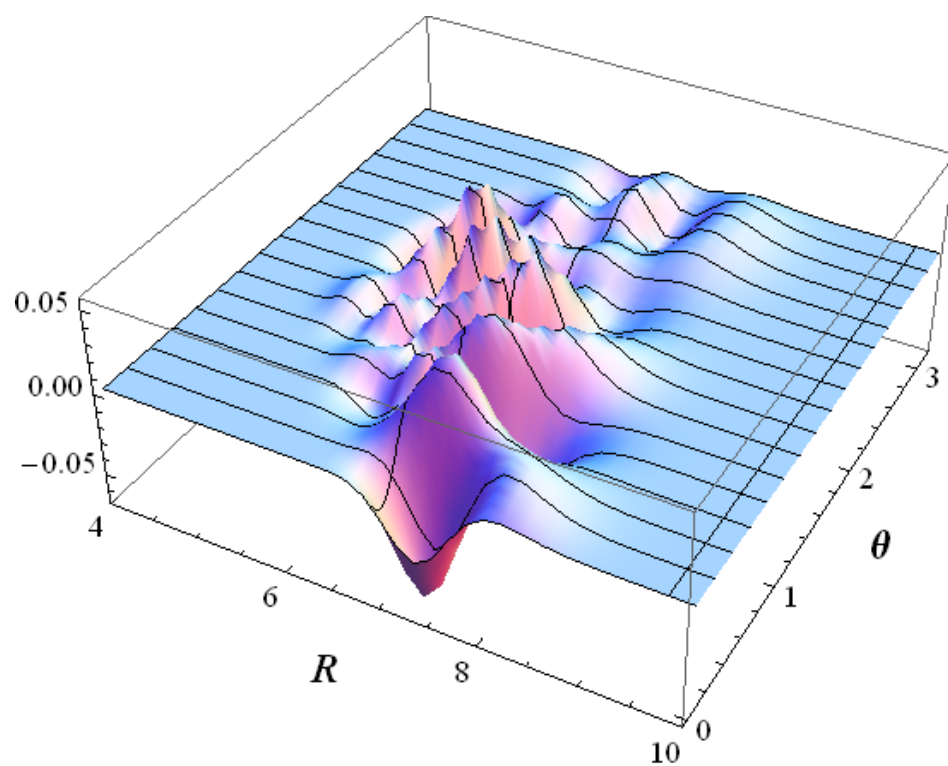

Figure S60. Eigenstate No. 60

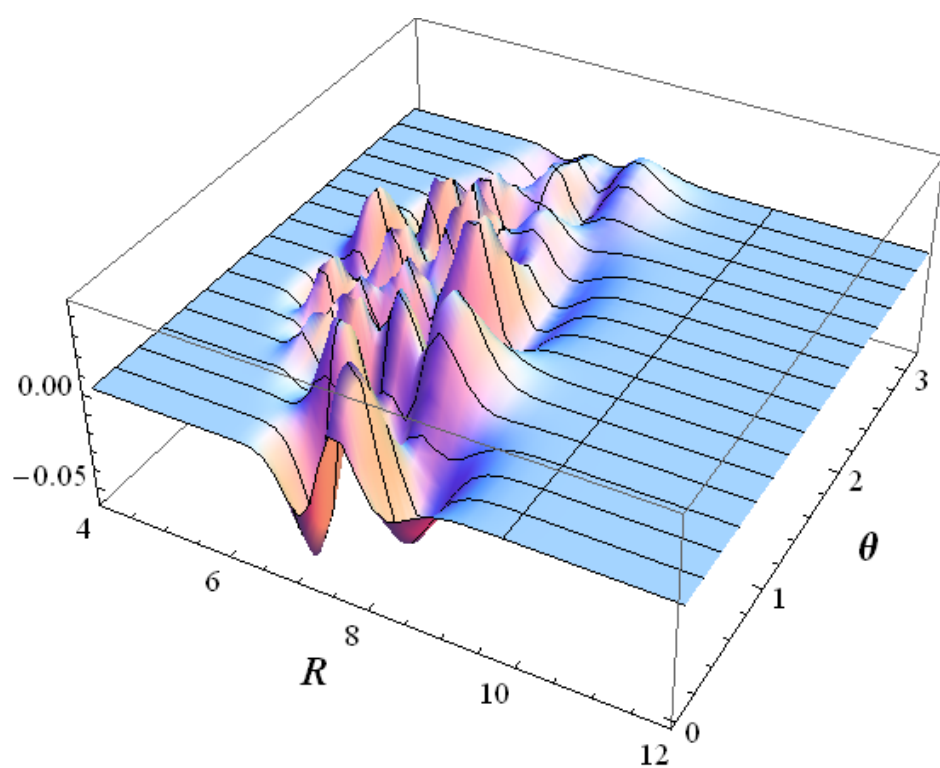

Figure S61. Eigenstate No. 61

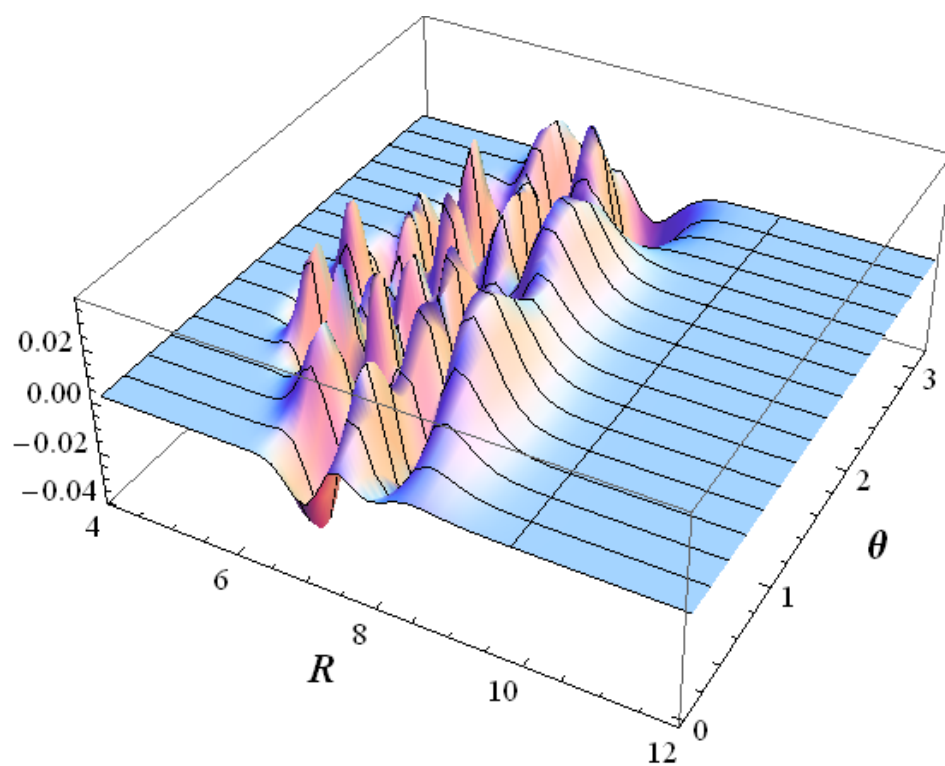

Figure S62. Eigenstate No. 62

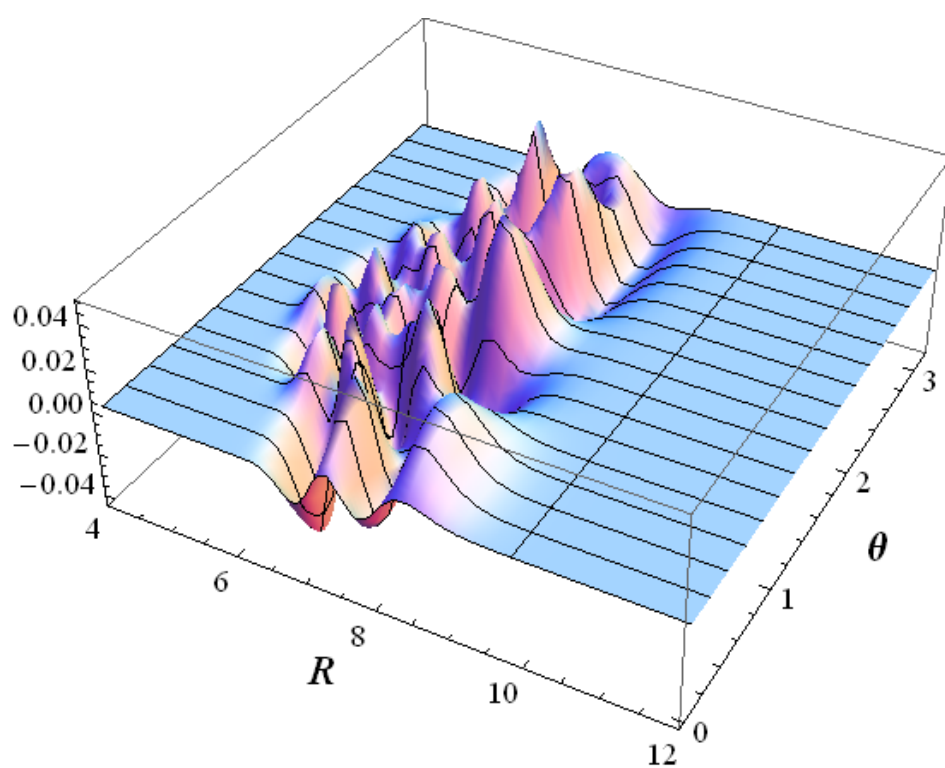

Figure S63. Eigenstate No. 63

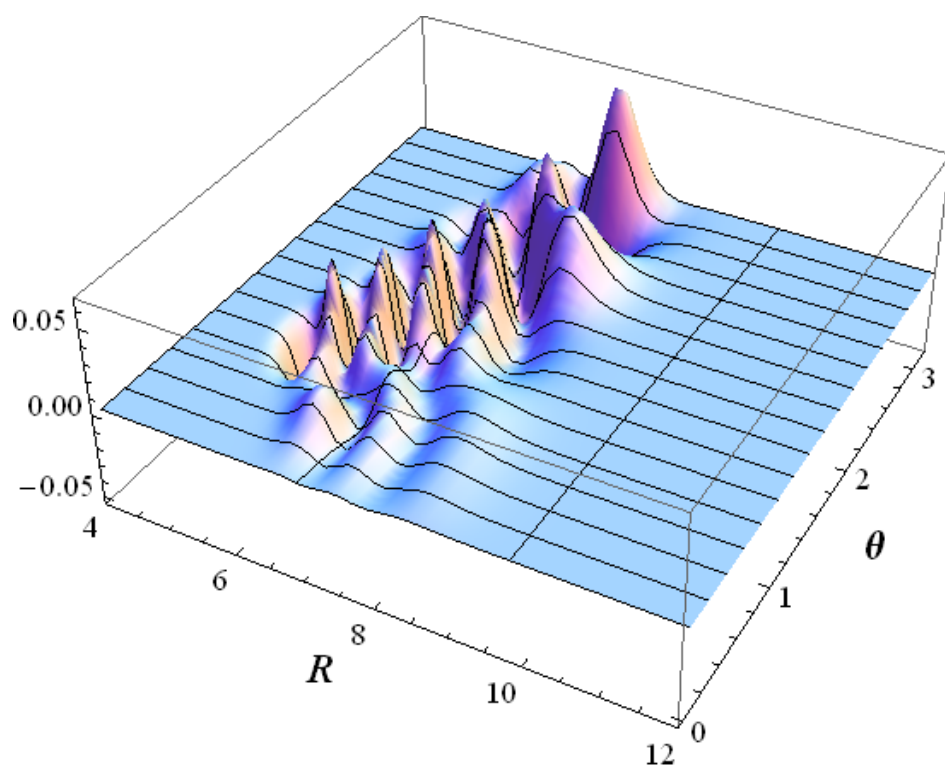

Figure S64. Eigenstate No. 64

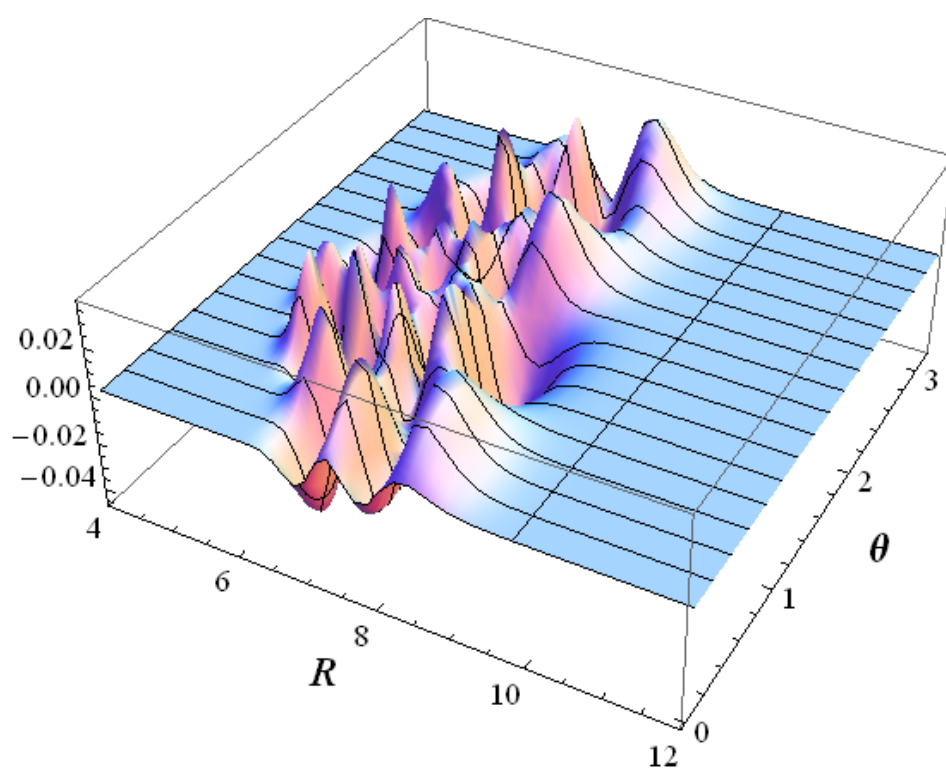

Figure S65. Eigenstate No. 65

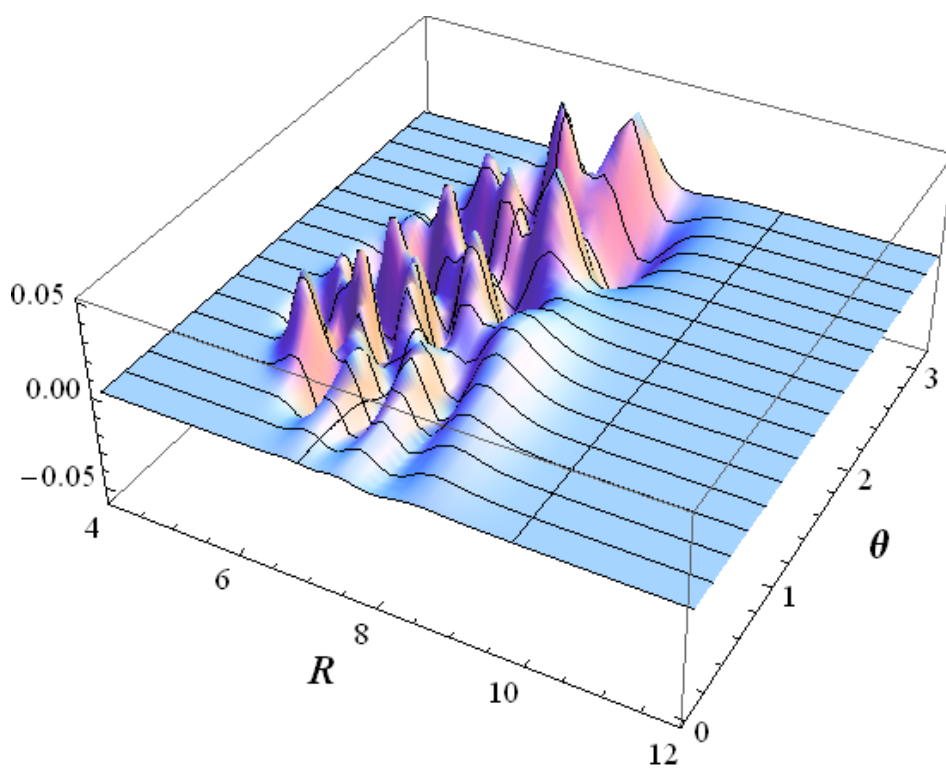

Figure S66. Eigenstate No. 66



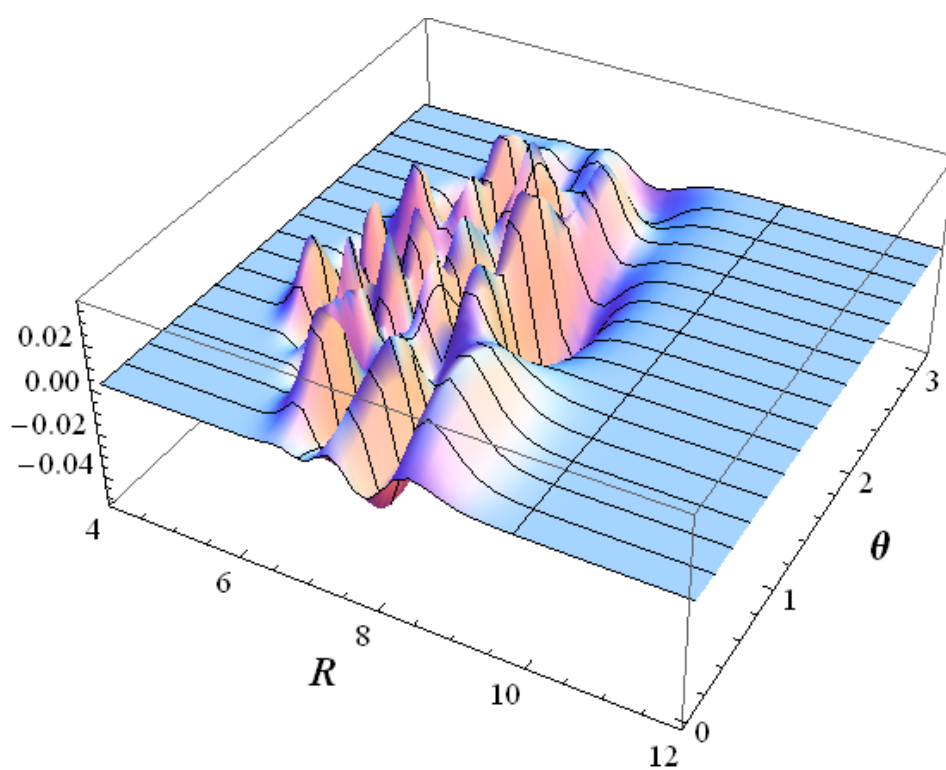

Figure S67. Eigenstate No. 67

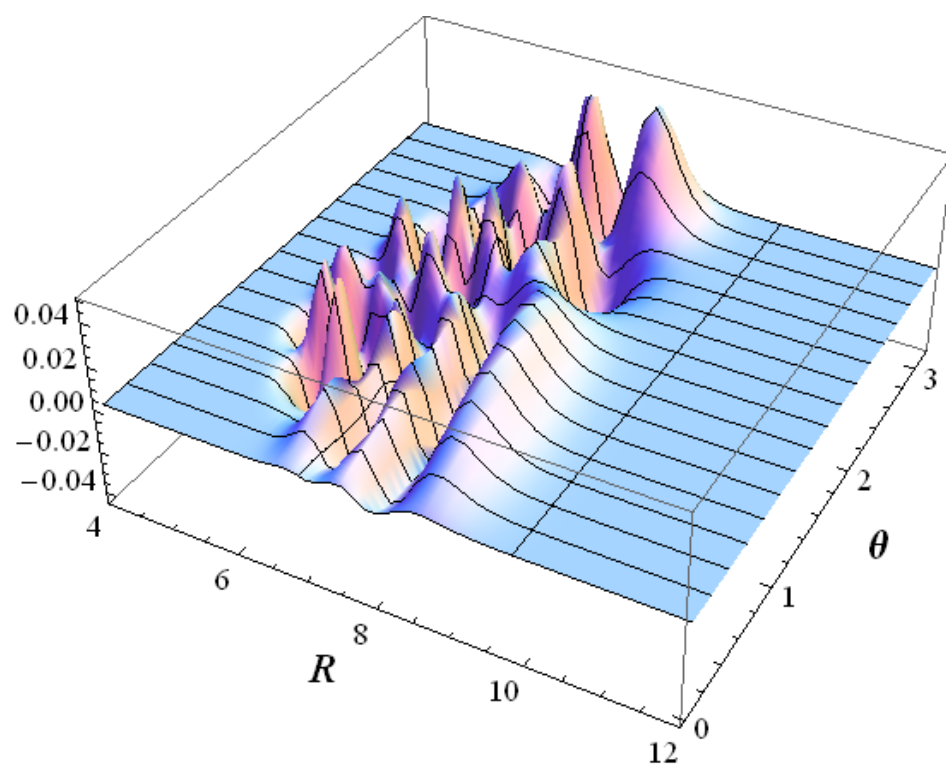

Figure S68. Eigenstate No. 68

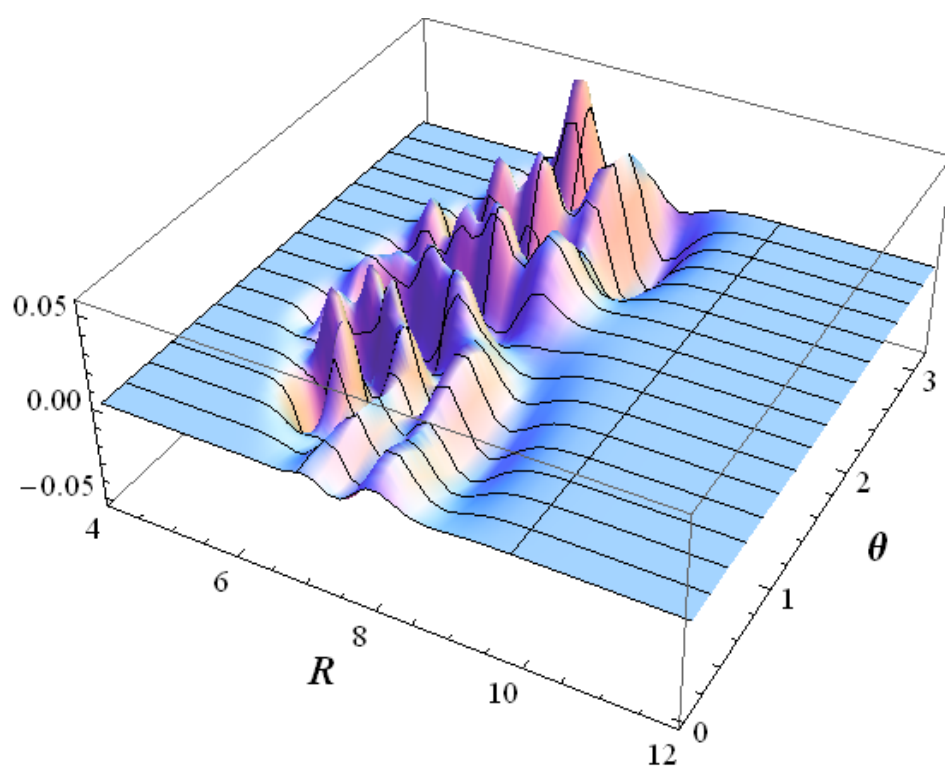

Figure S69. Eigenstate No. 69

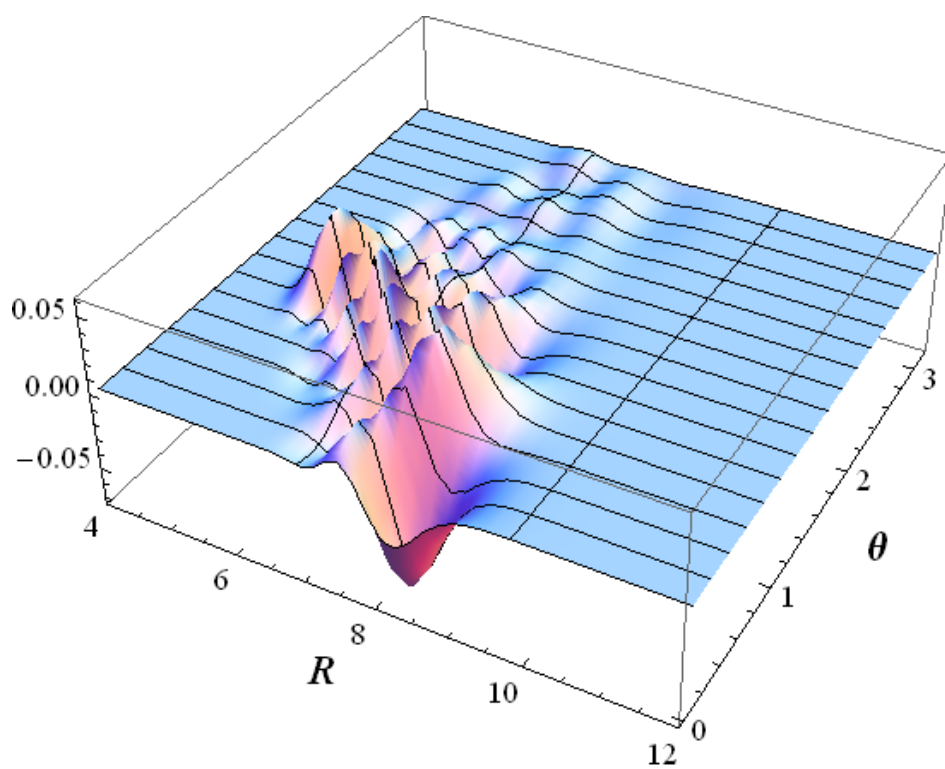

Figure S70. Eigenstate No. 70



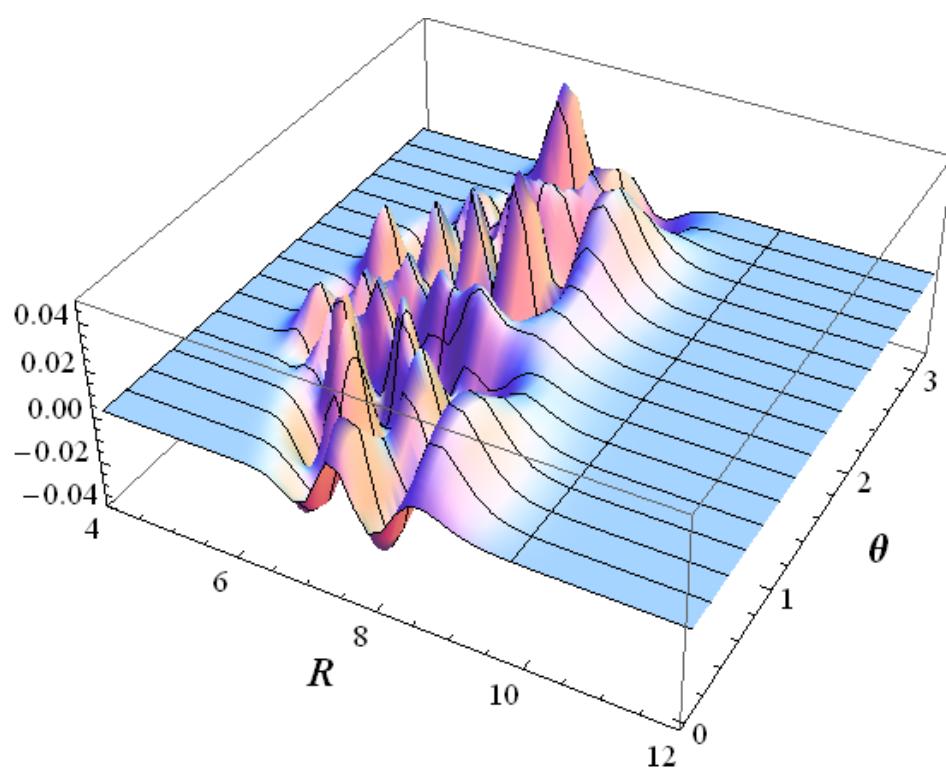

Figure S71. Eigenstate No. 71

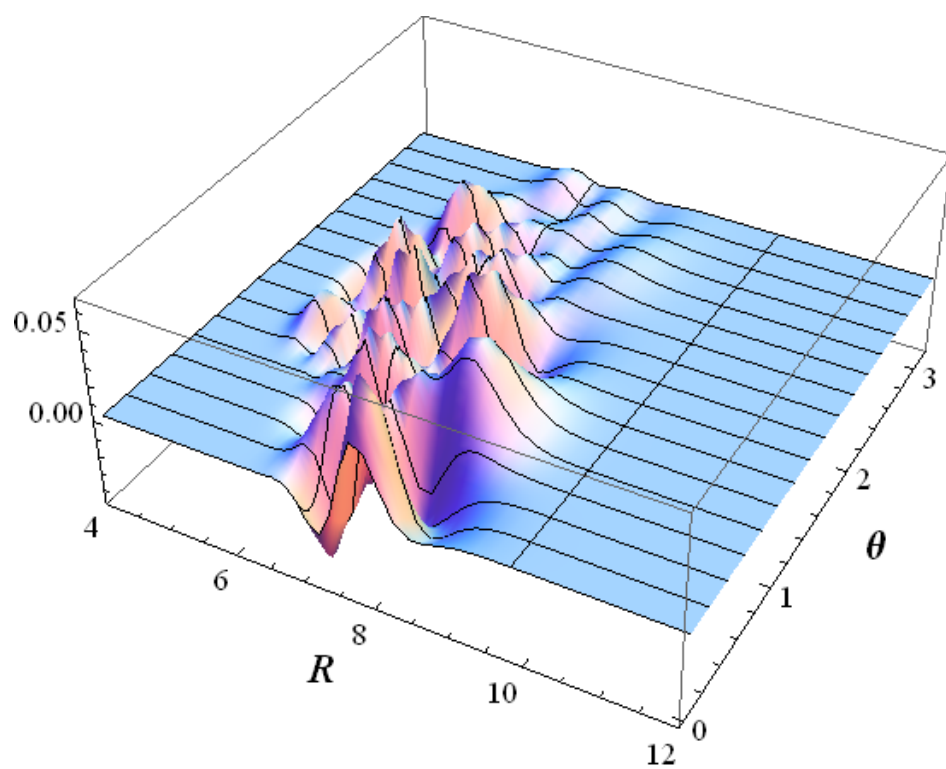

Figure S72. Eigenstate No. 72

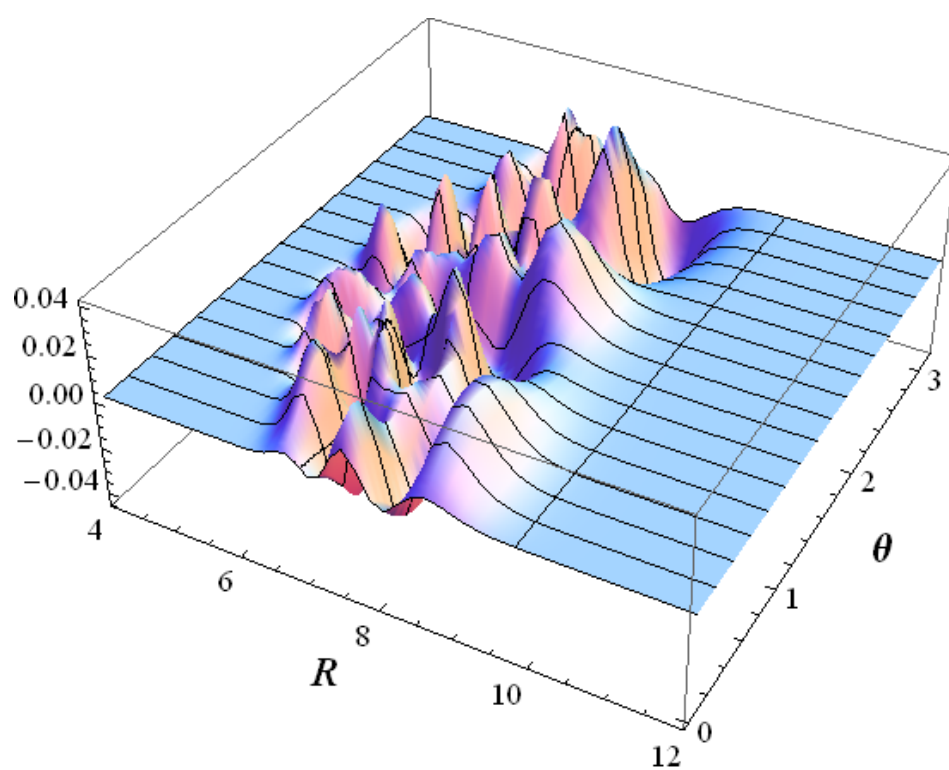

Figure S73. Eigenstate No. 73

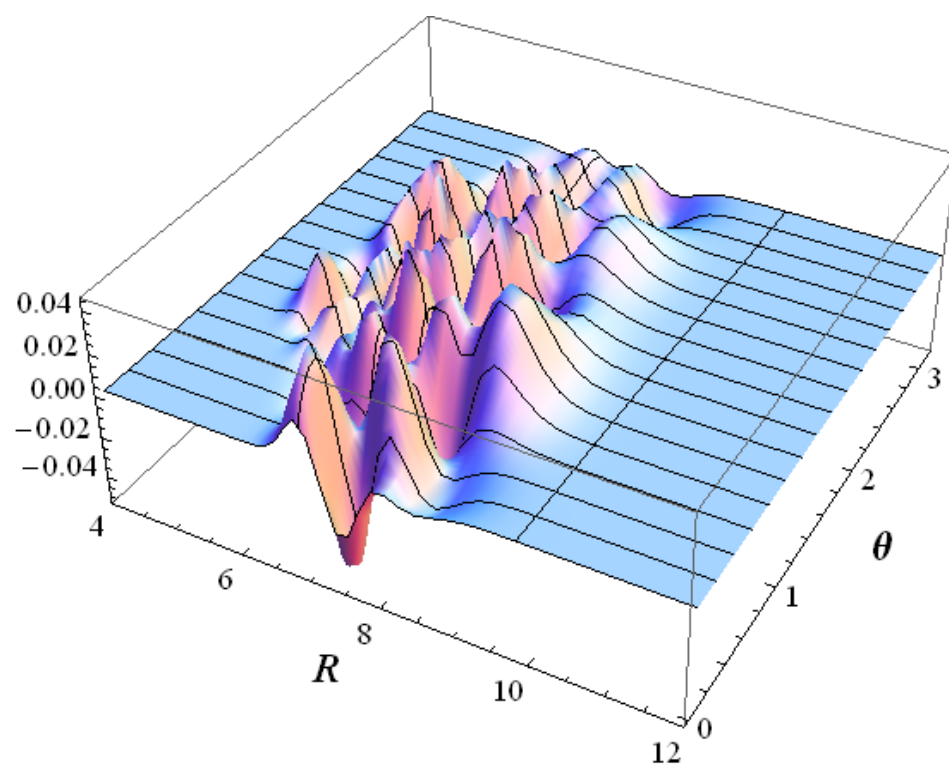

Figure S74. Eigenstate No. 74

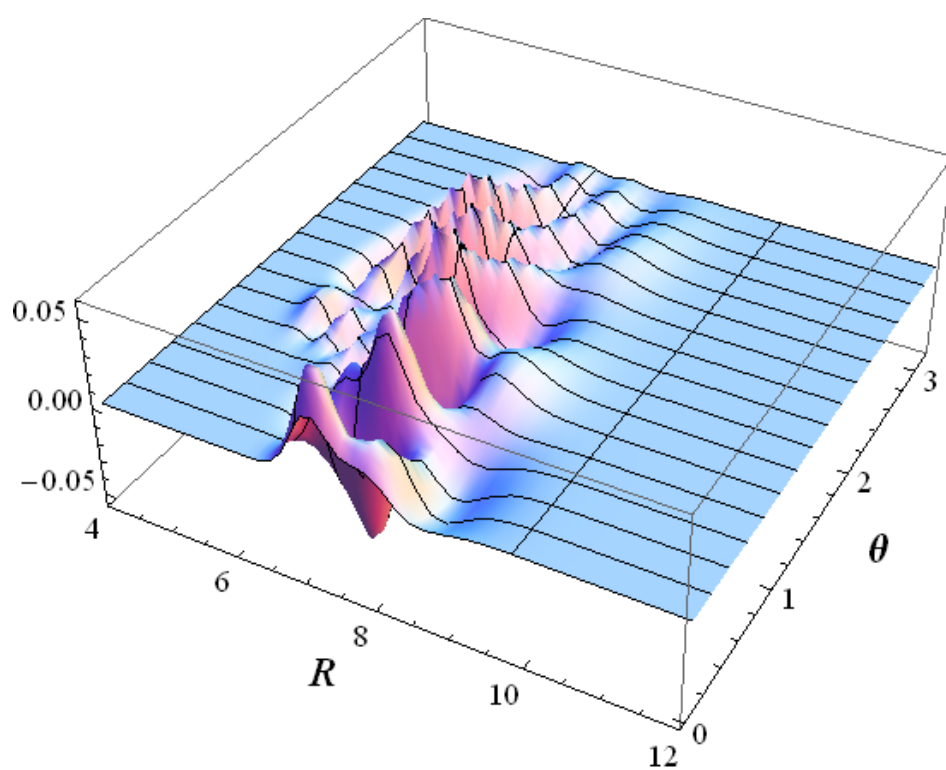

Figure S75. Eigenstate No. 75

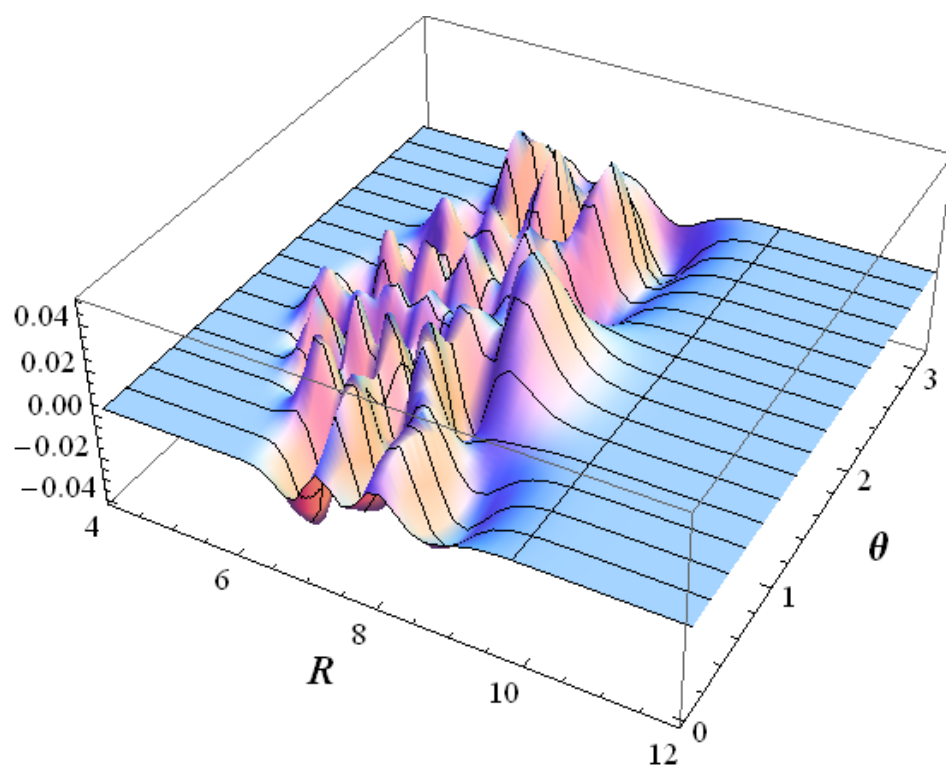

Figure S76. Eigenstate No. 76

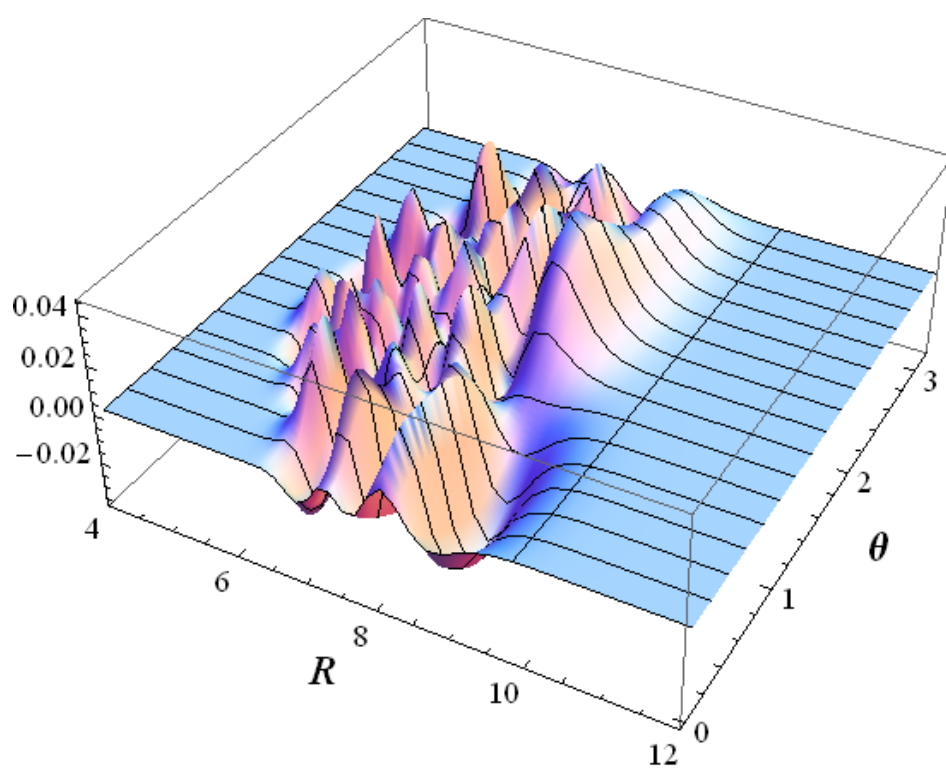

Figure S77. Eigenstate No. 77

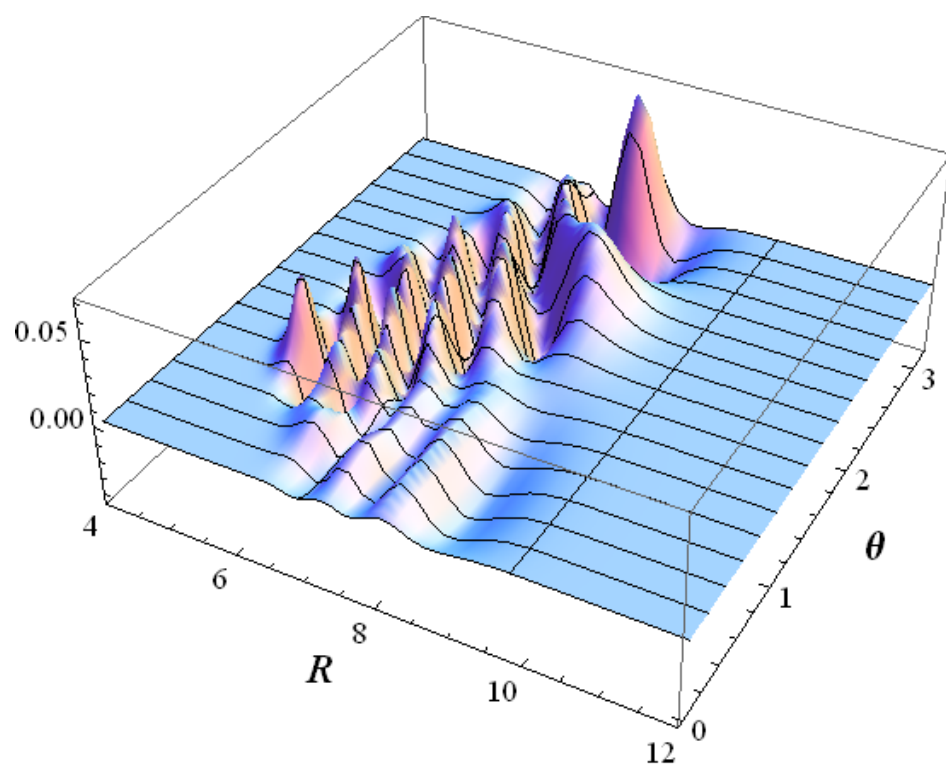

Figure S78. Eigenstate No. 78

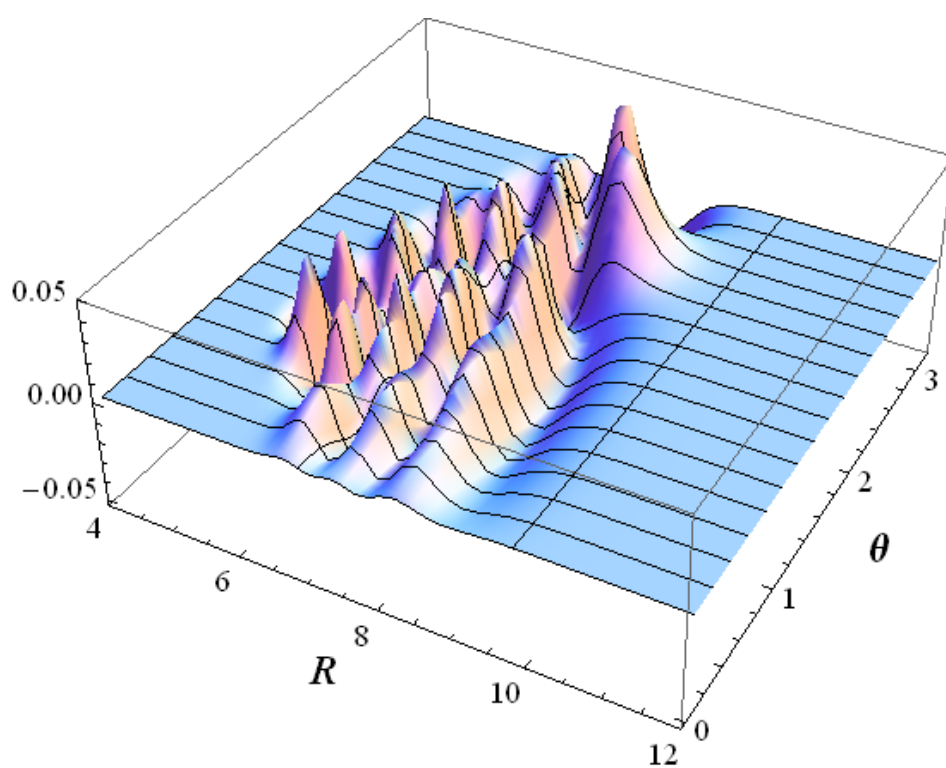

Figure S79. Eigenstate No. 79

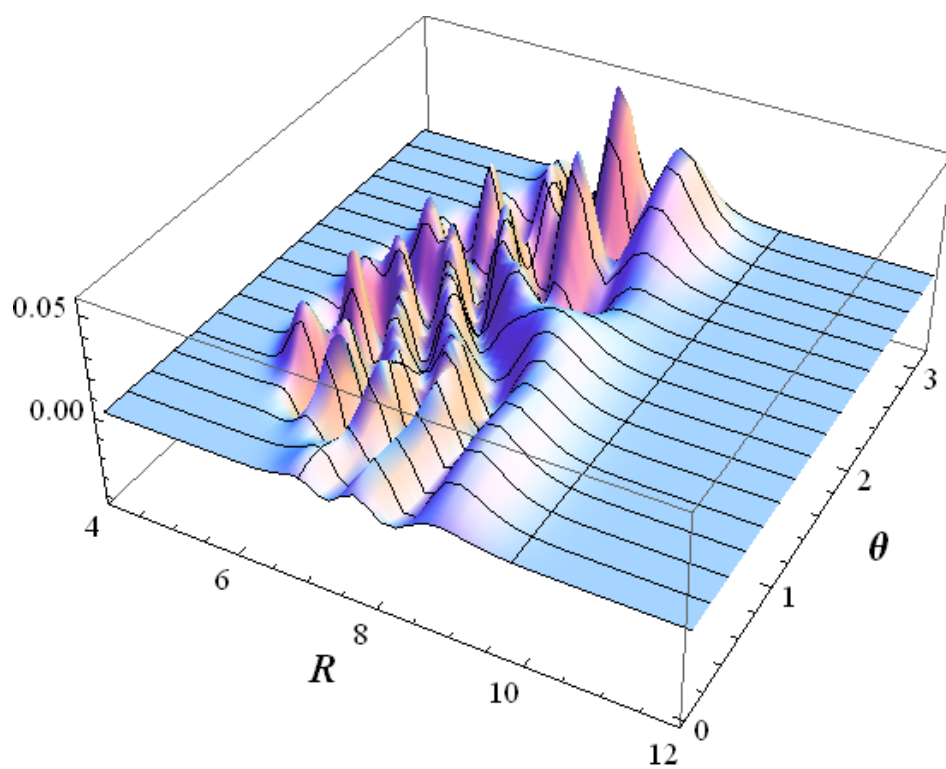

Figure S80. Eigenstate No. 80

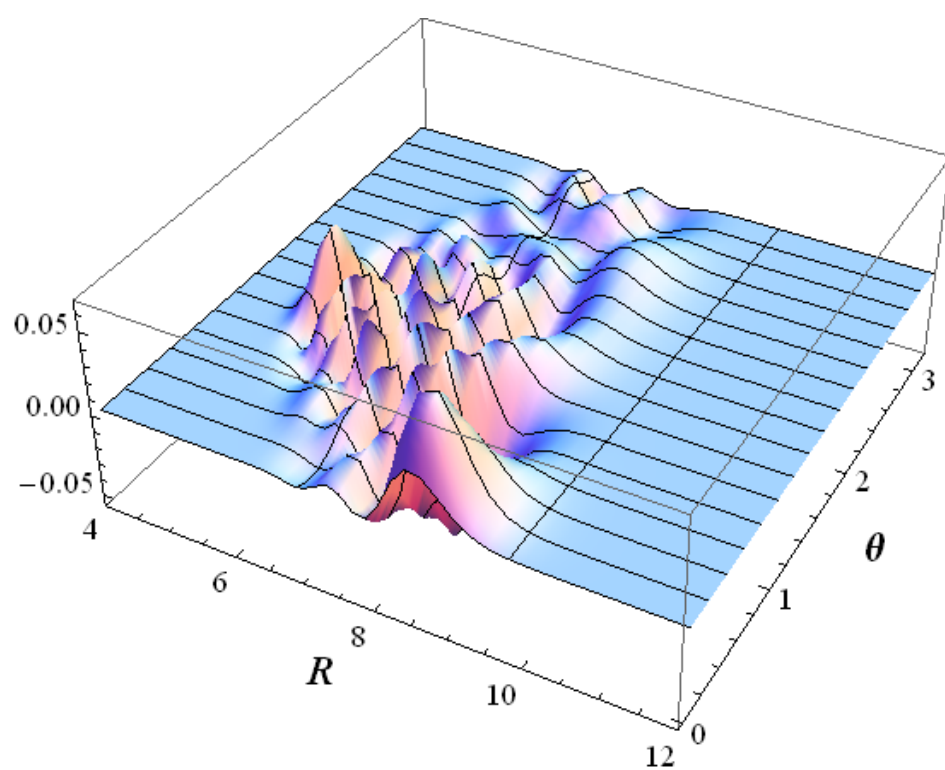

Figure S81. Eigenstate No. 81

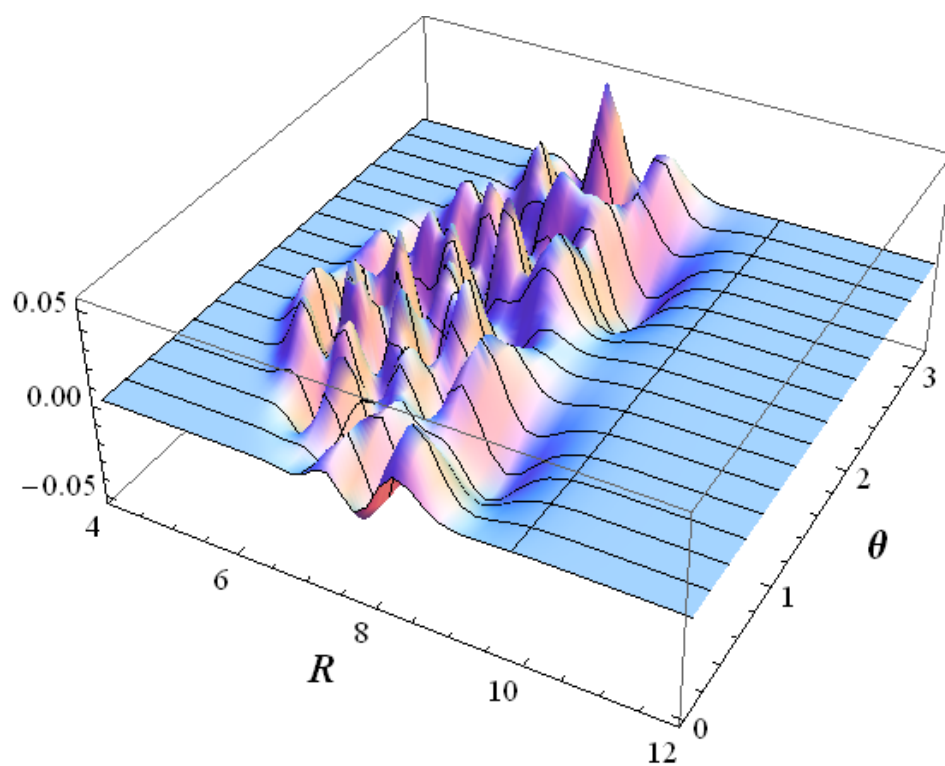

Figure S82. Eigenstate No. 82



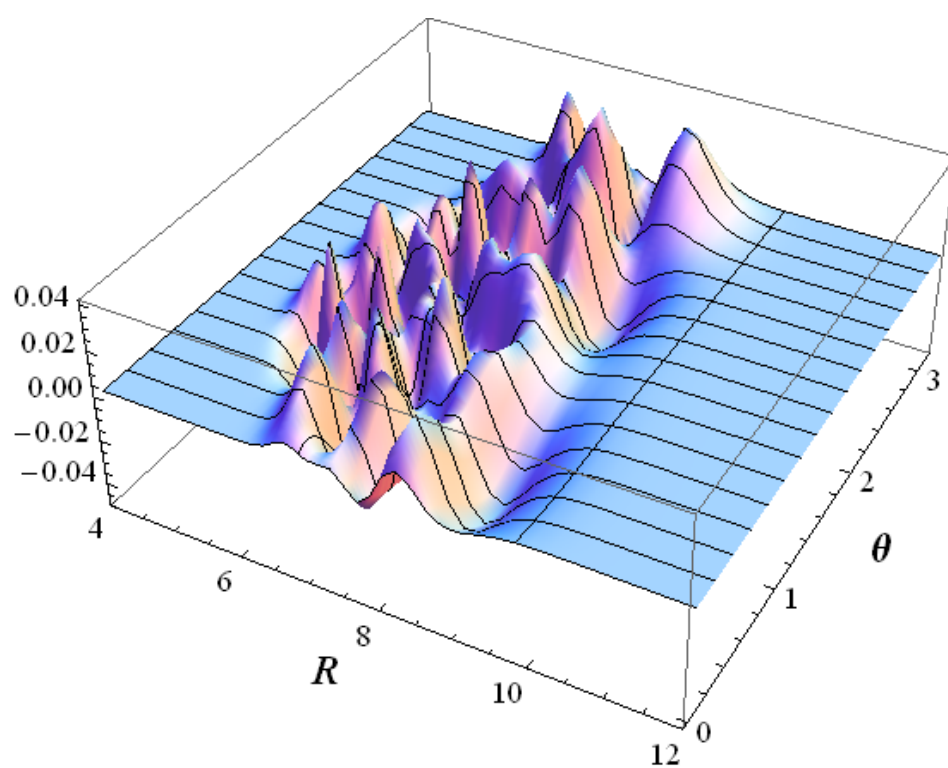

Figure S83. Eigenstate No. 83

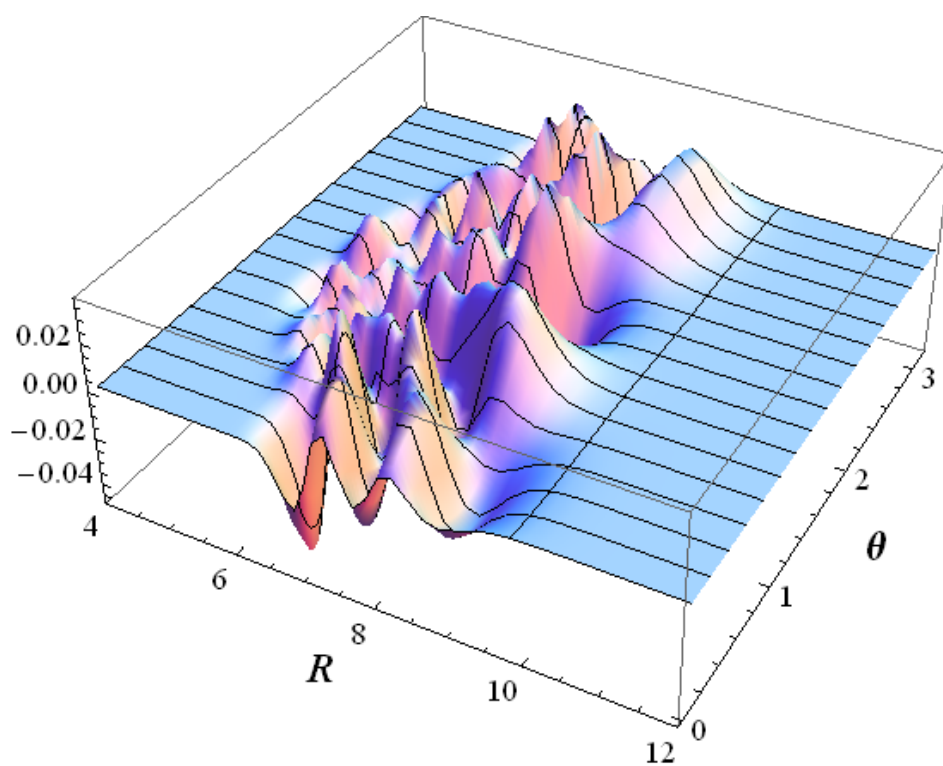

Figure S84. Eigenstate No. 84



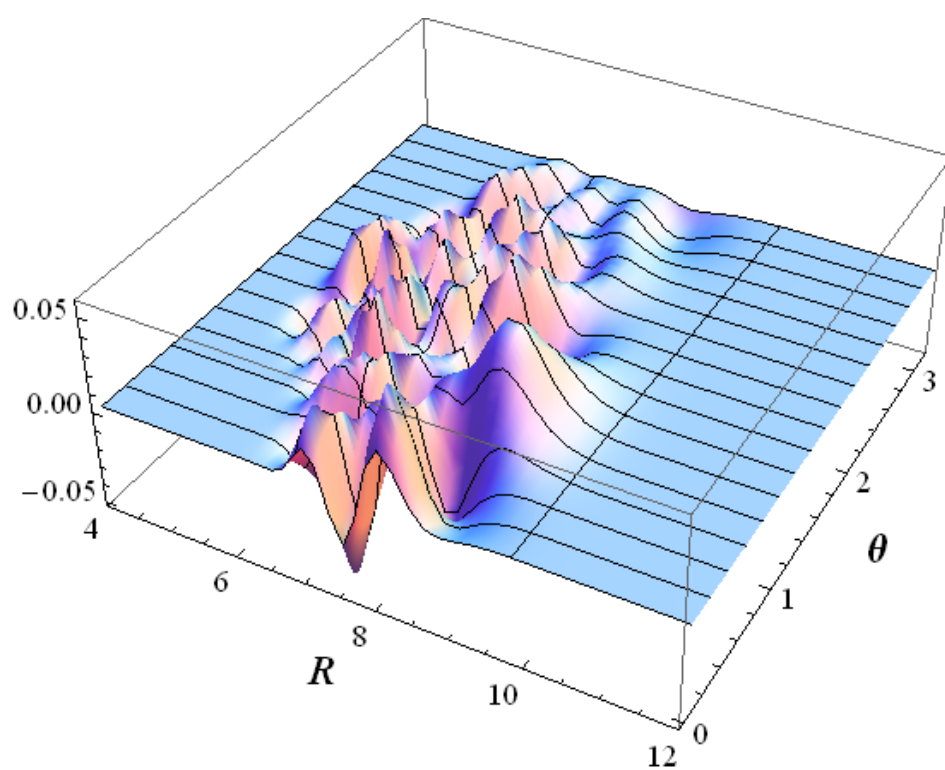

Figure S85. Eigenstate No. 85

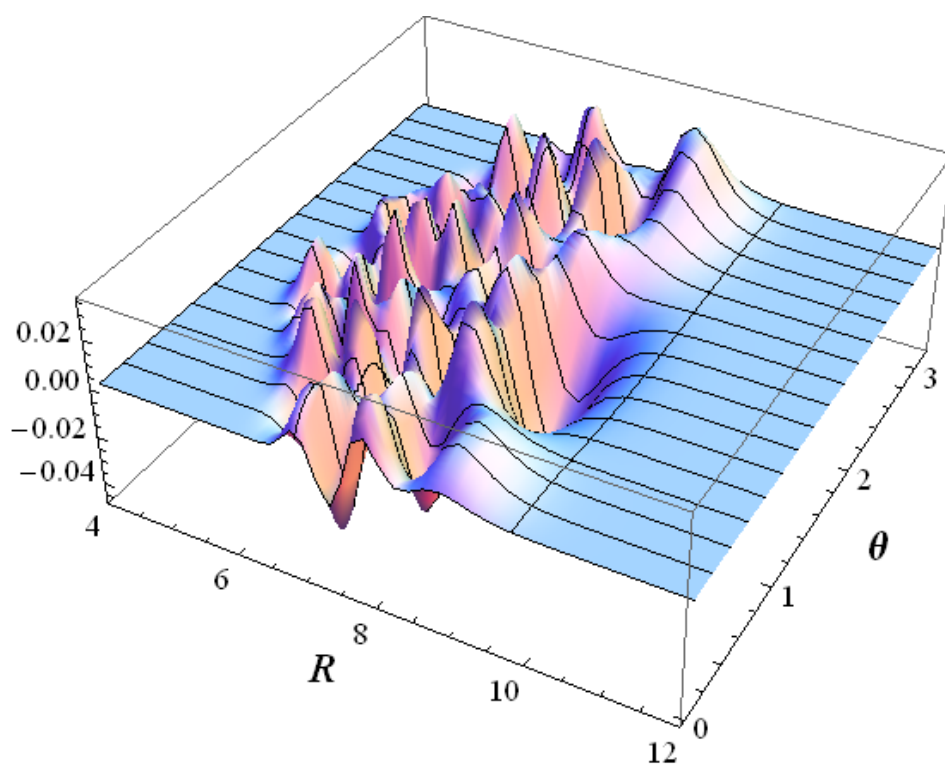

Figure S86. Eigenstate No. 86

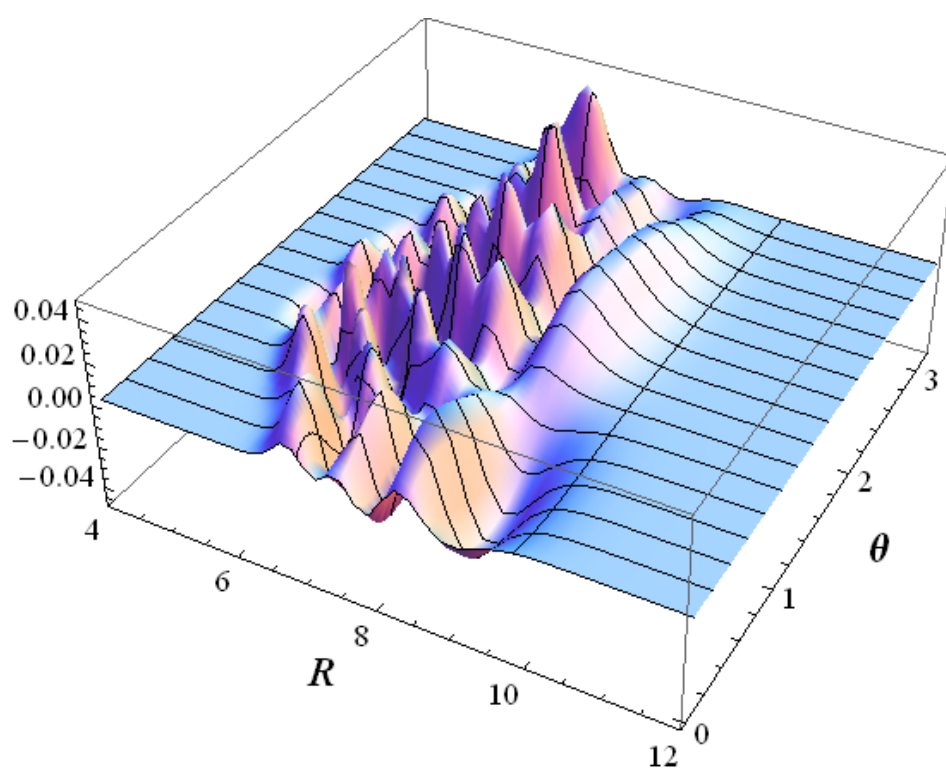

Figure S87. Eigenstate No. 87

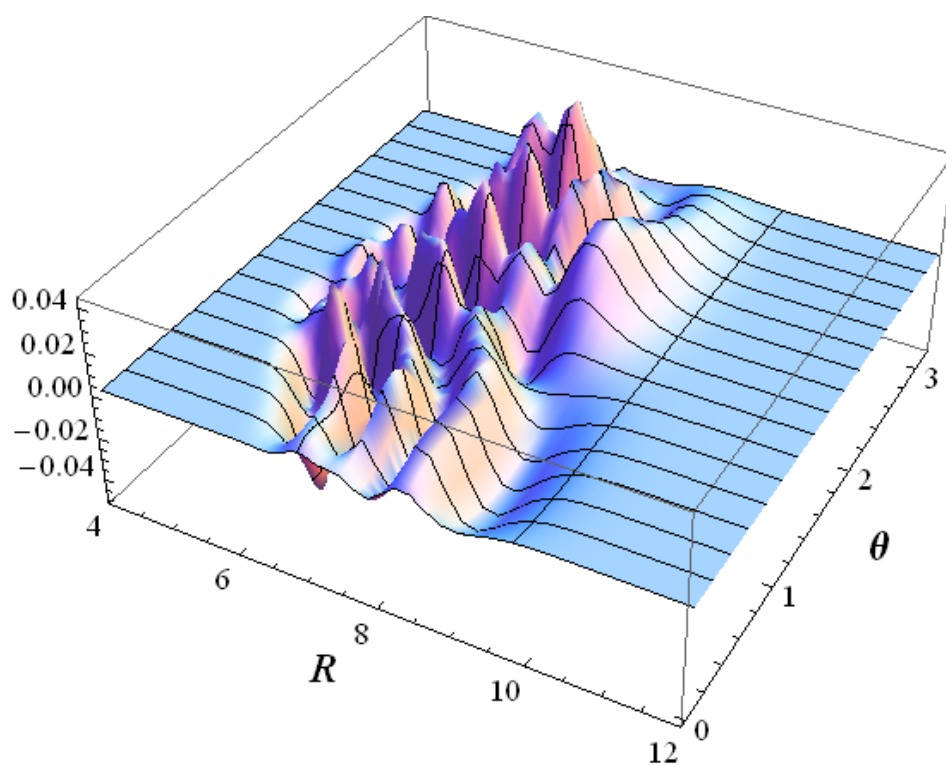

Figure S88. Eigenstate No. 88

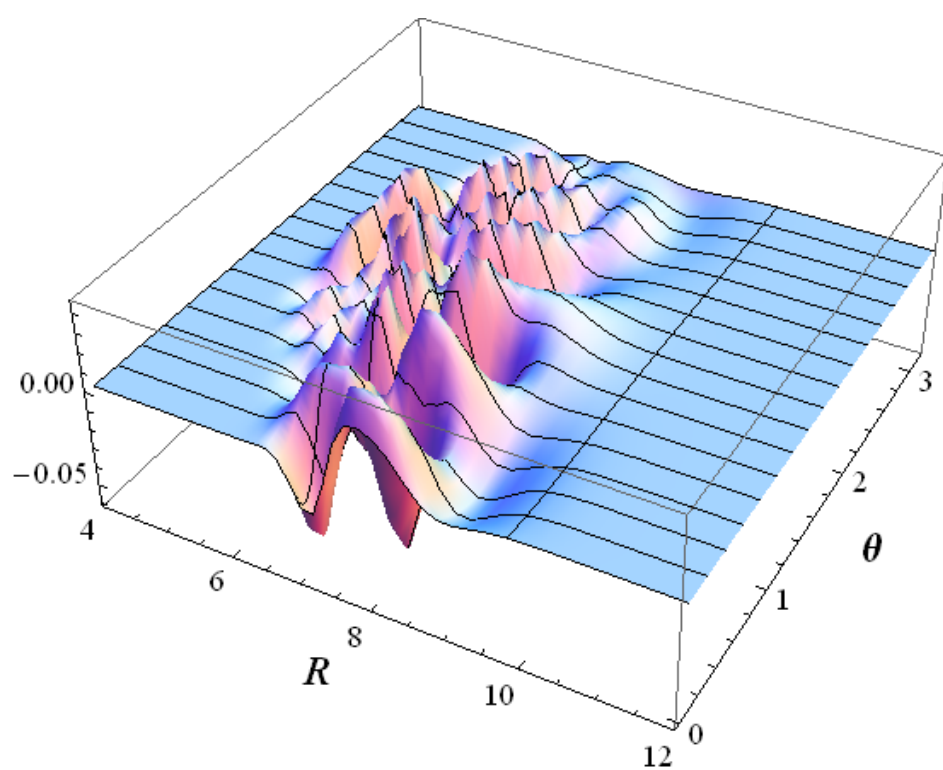

Figure S89. Eigenstate No. 89

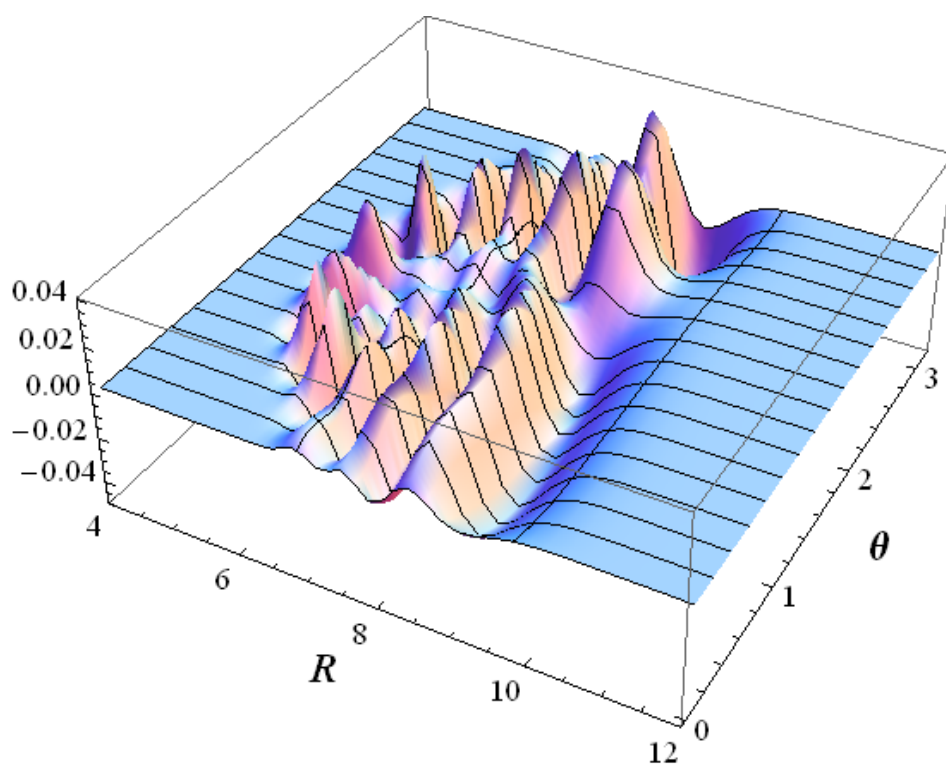

Figure S90. Eigenstate No. 90

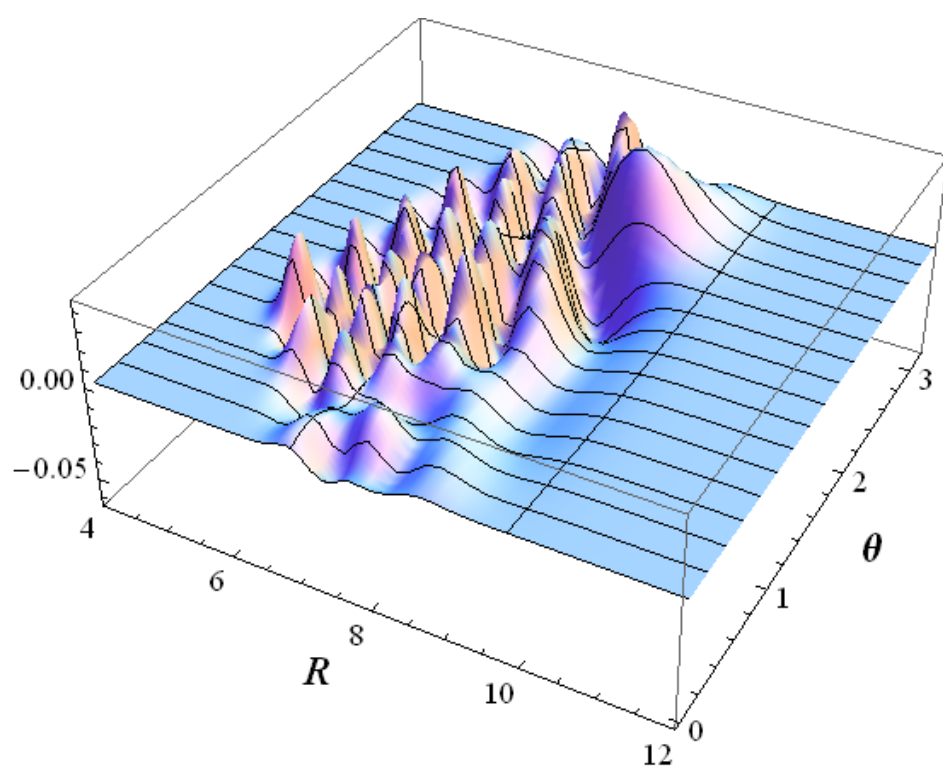

Figure S91. Eigenstate No. 91

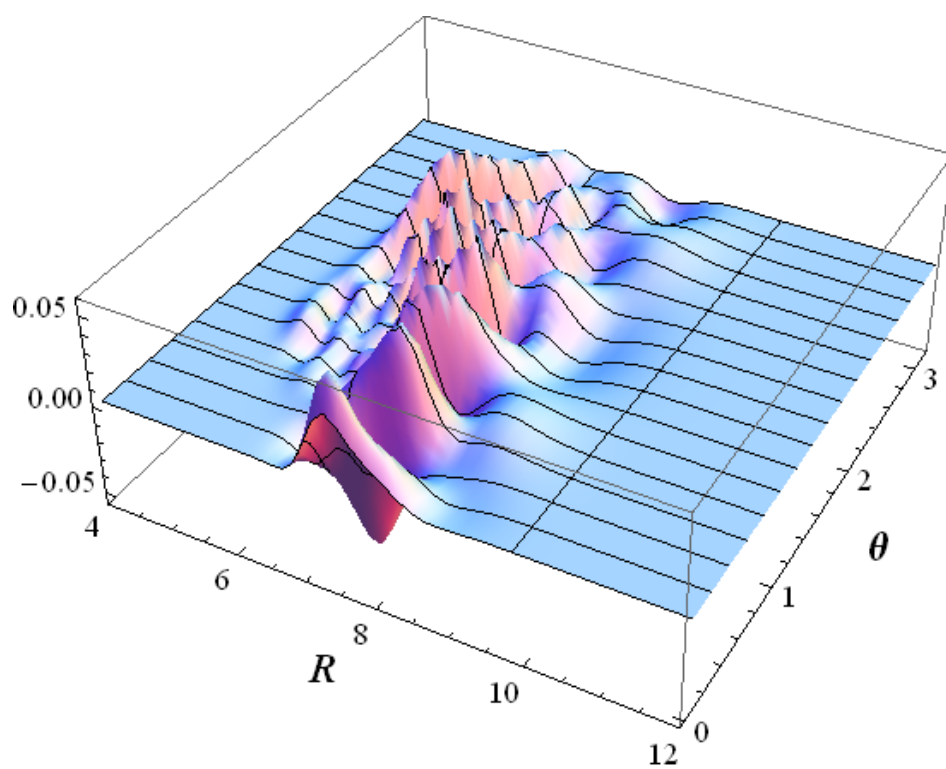

Figure S92. Eigenstate No. 92

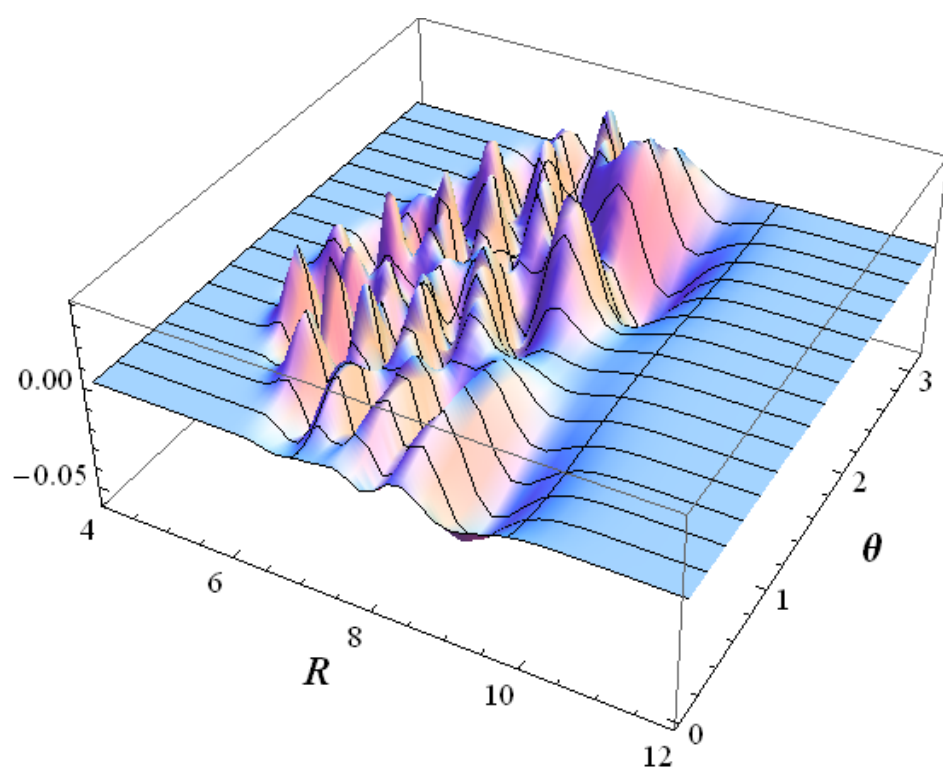

Figure S93. Eigenstate No. 93

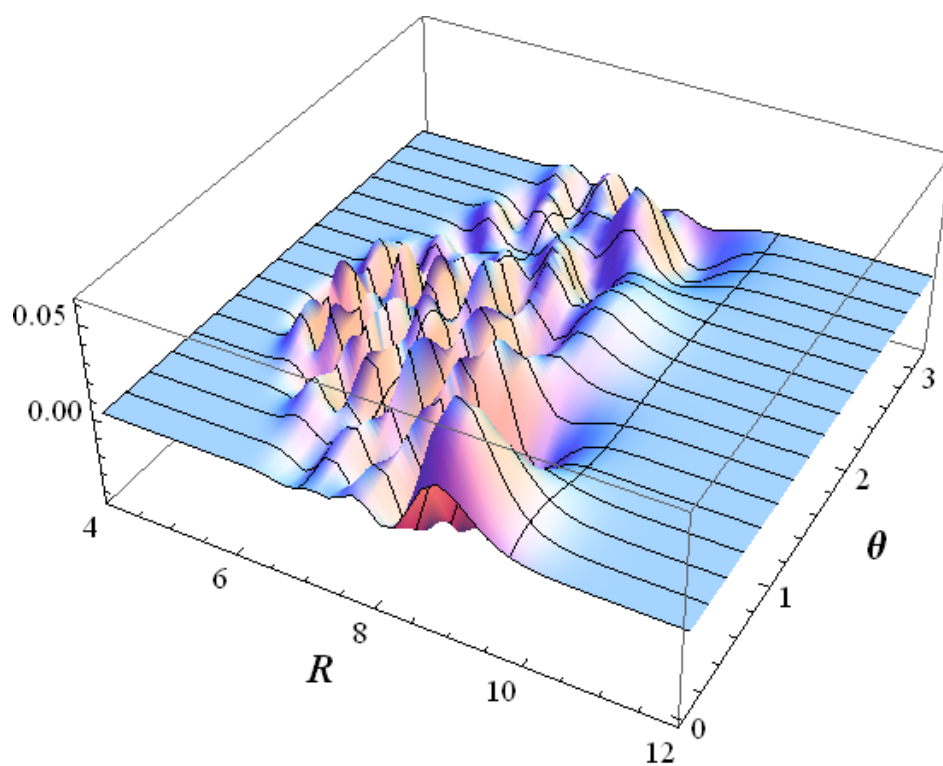

Figure S94. Eigenstate No. 94

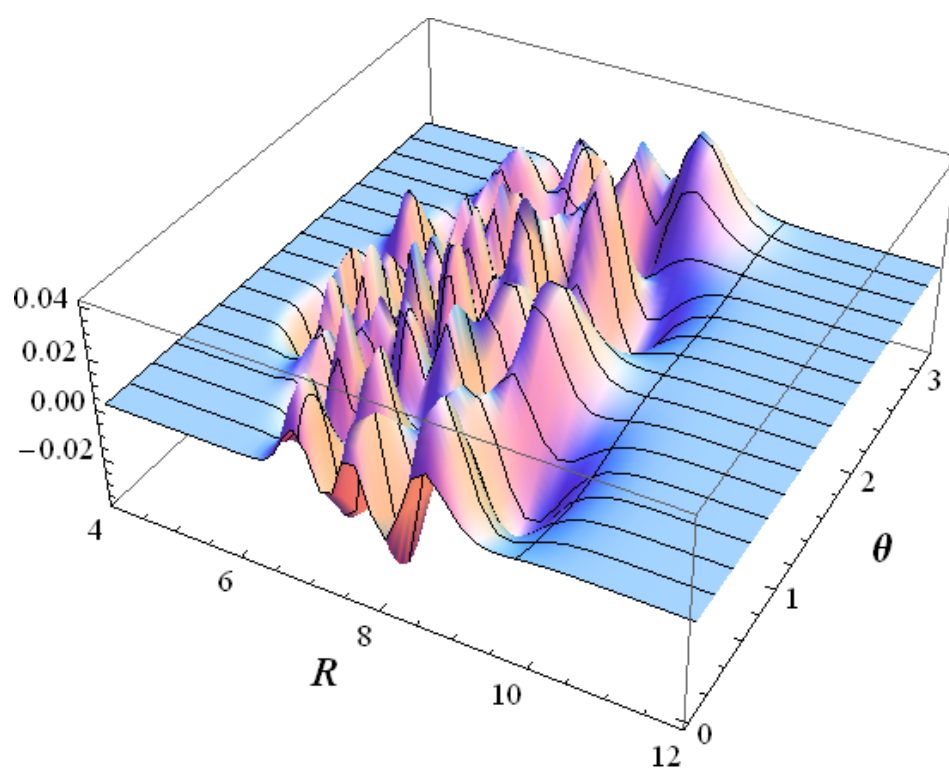

Figure S95. Eigenstate No. 95

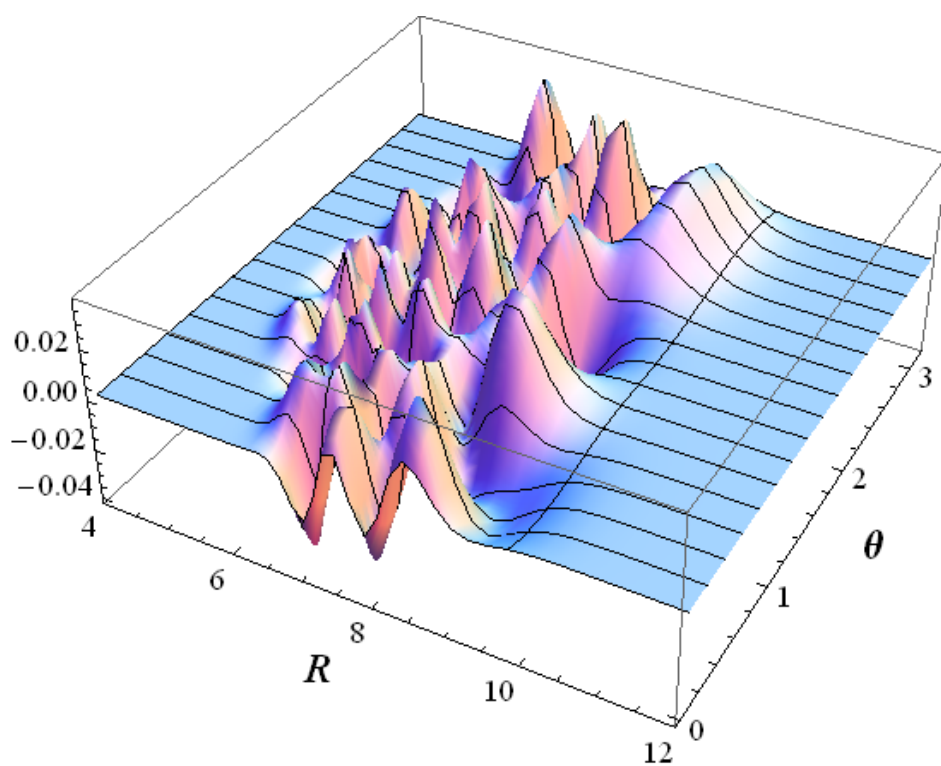

Figure S96. Eigenstate No. 96



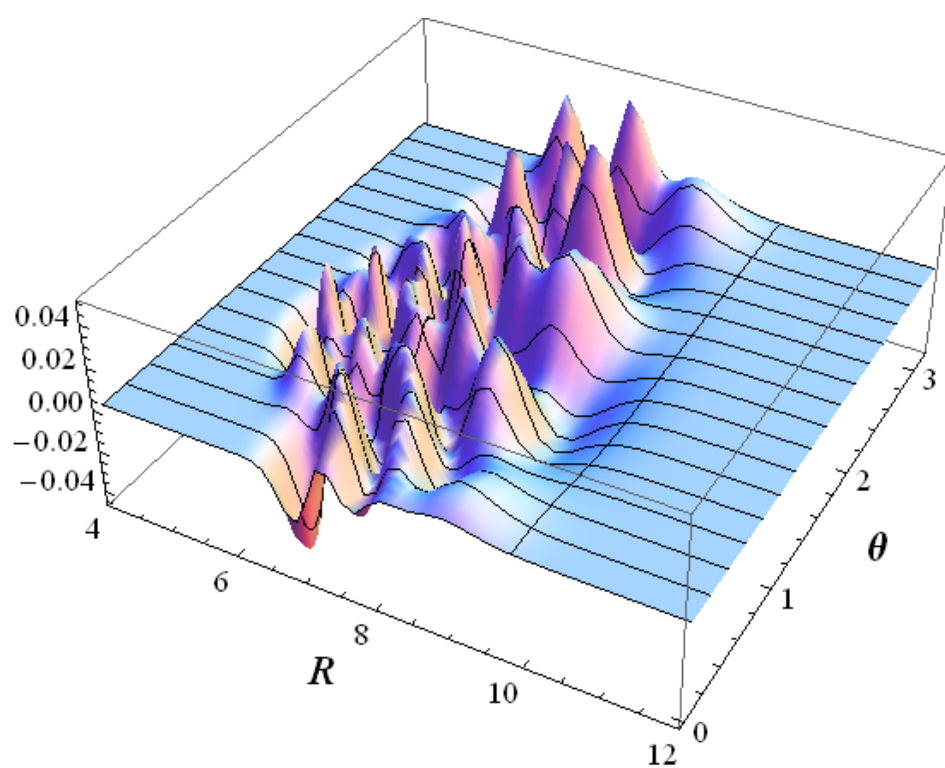

Figure S97. Eigenstate No. 97

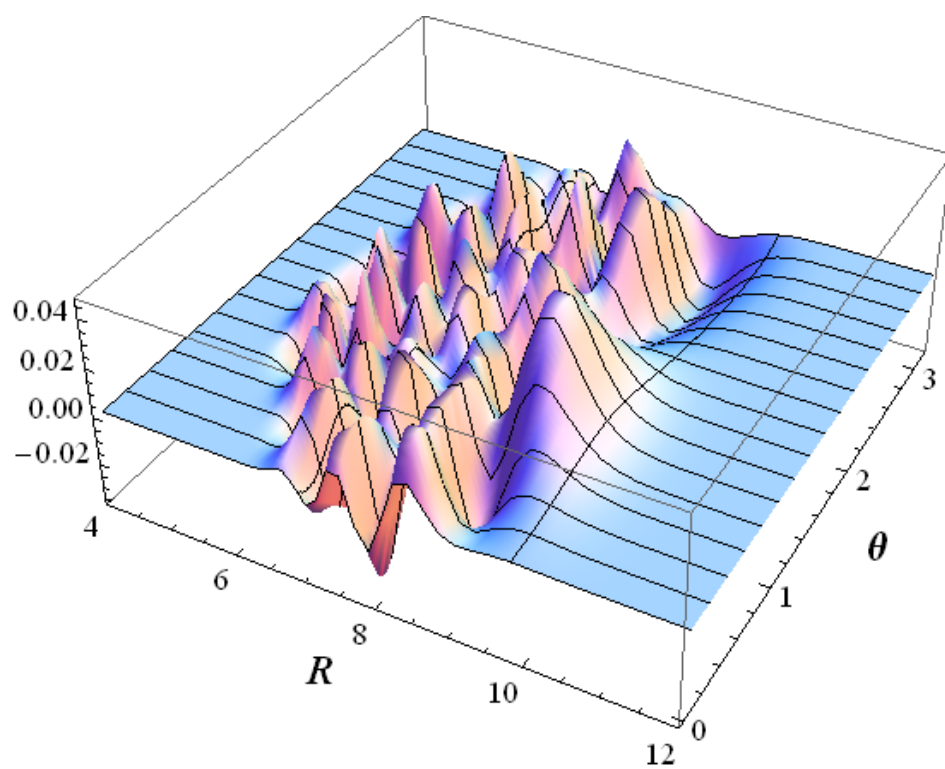

Figure S98. Eigenstate No. 98



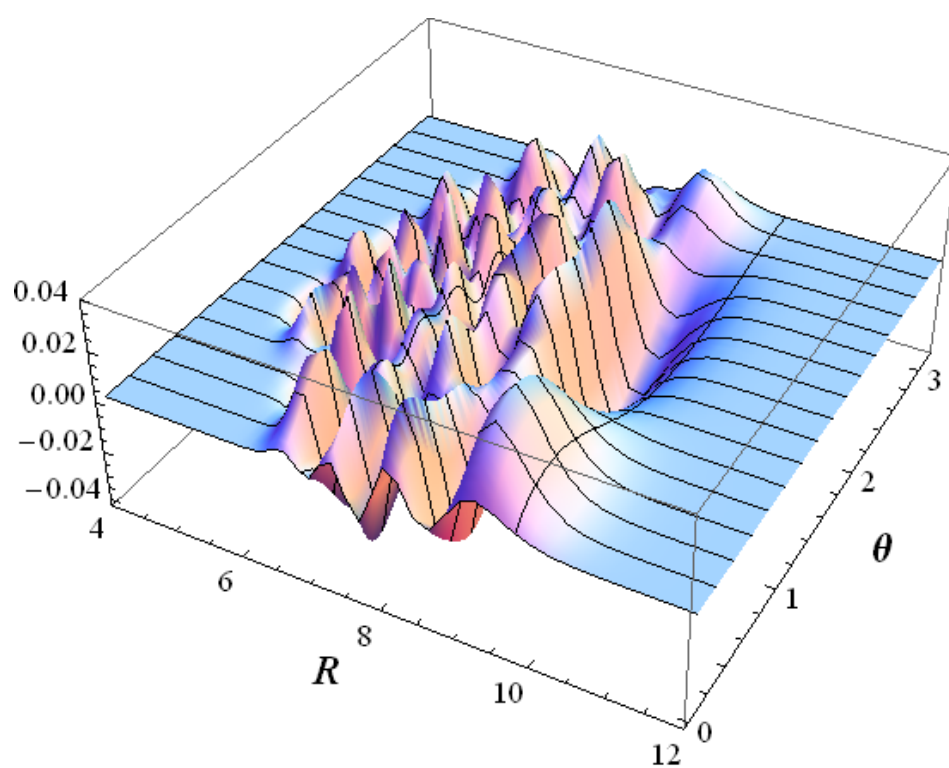

Figure S99. Eigenstate No. 99

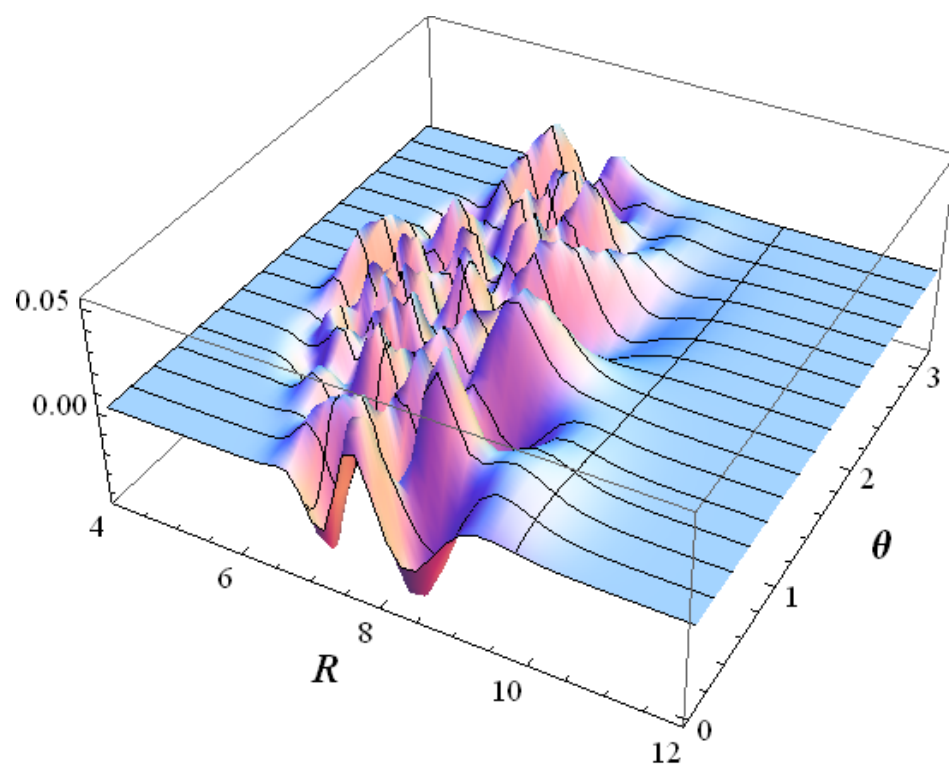

Figure S100. Eigenstate No. 100

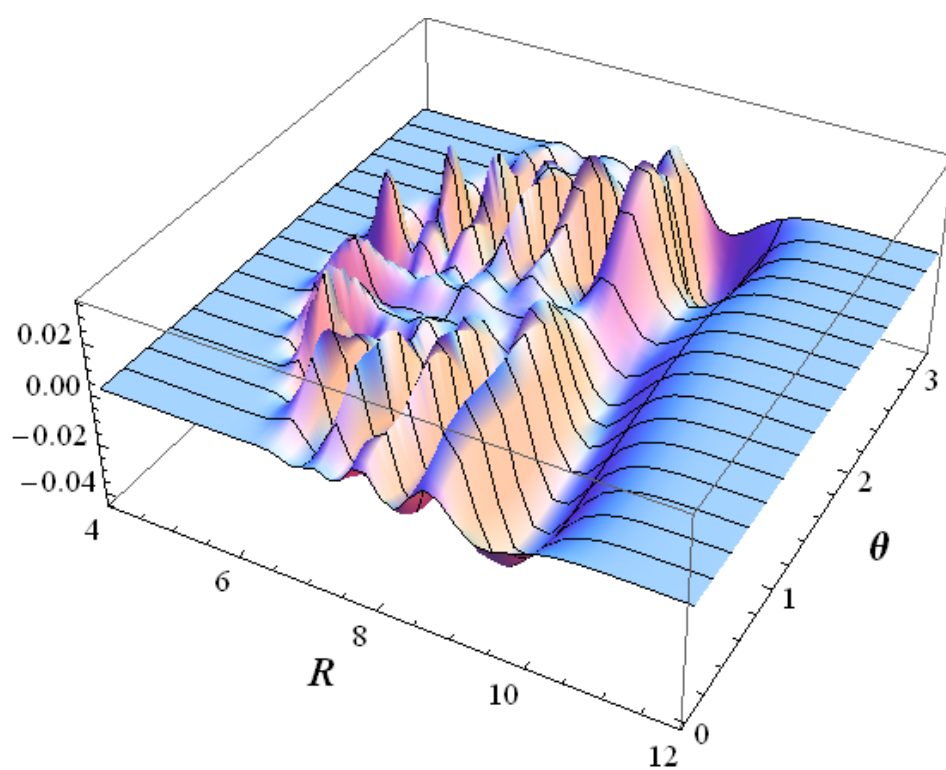

Figure S101. Eigenstate No. 101

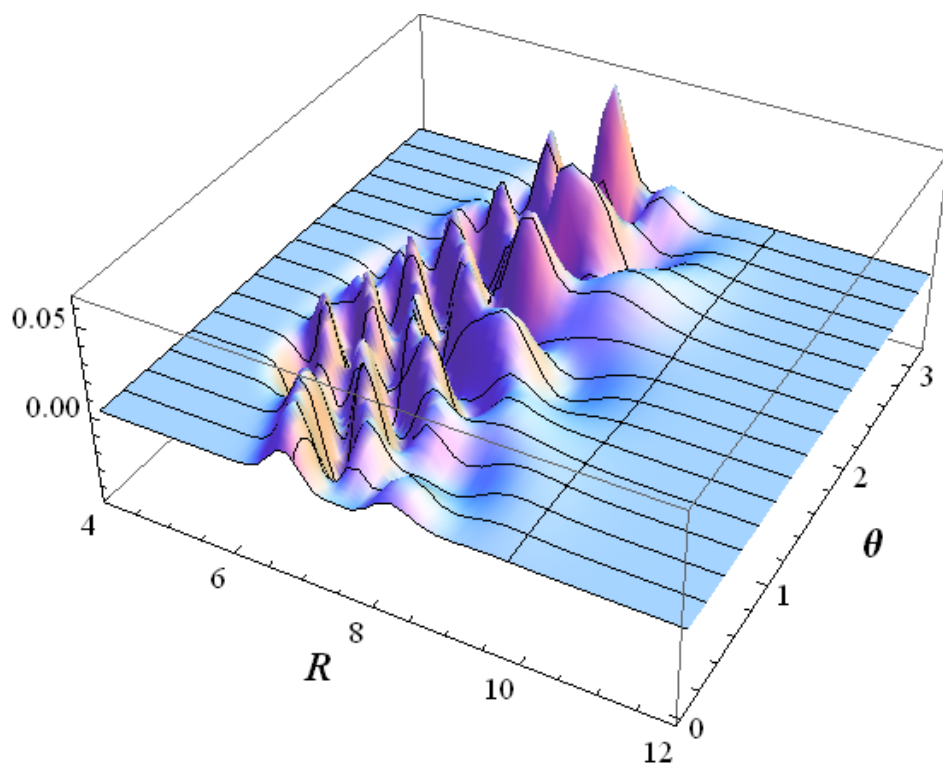

Figure S102. Eigenstate No. 102

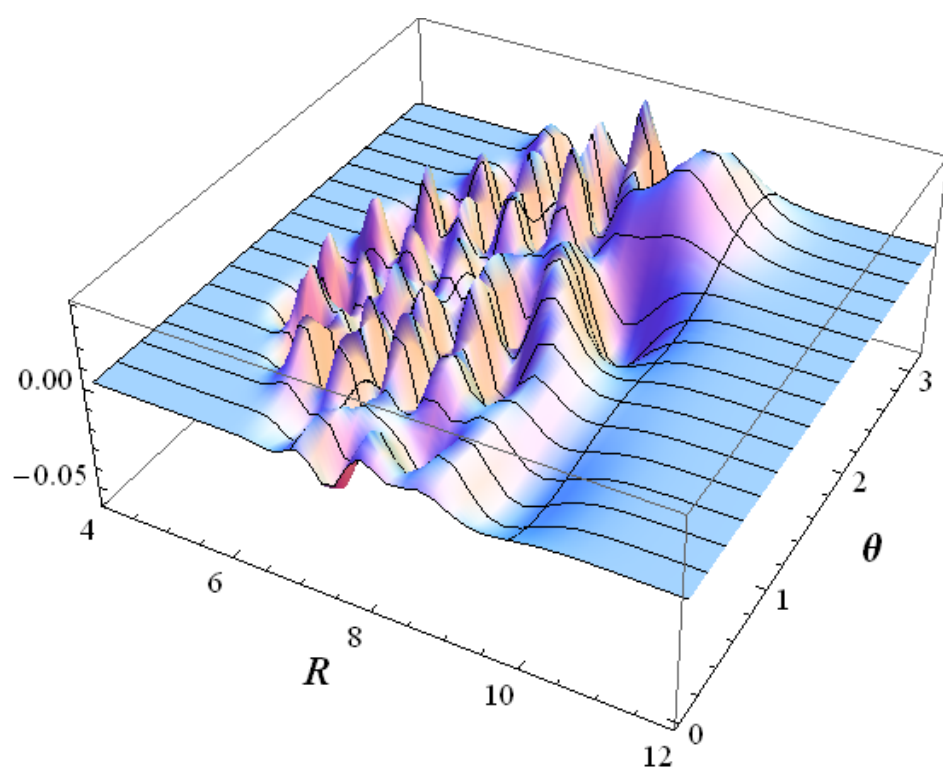

Figure S103. Eigenstate No. 103

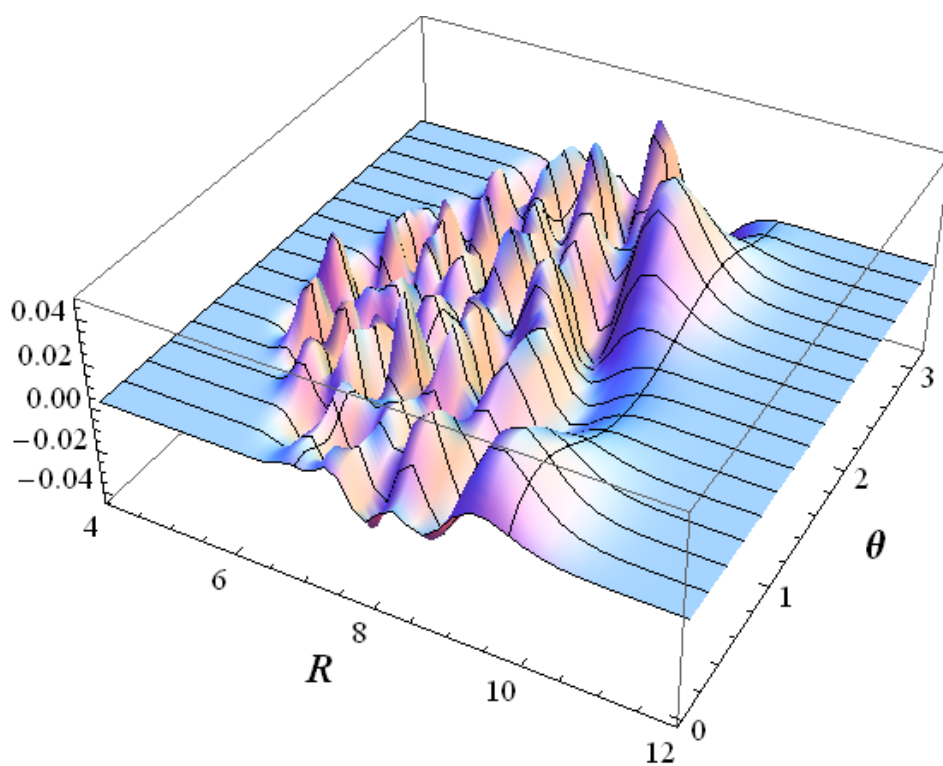

Figure S104. Eigenstate No. 104

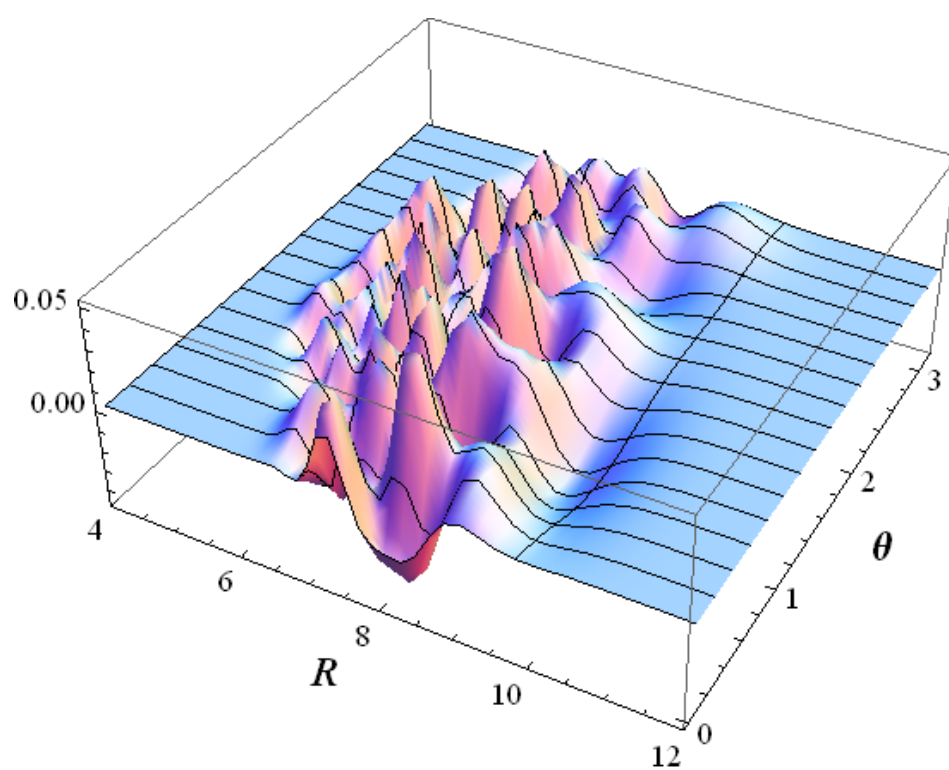

Figure S105. Eigenstate No. 105

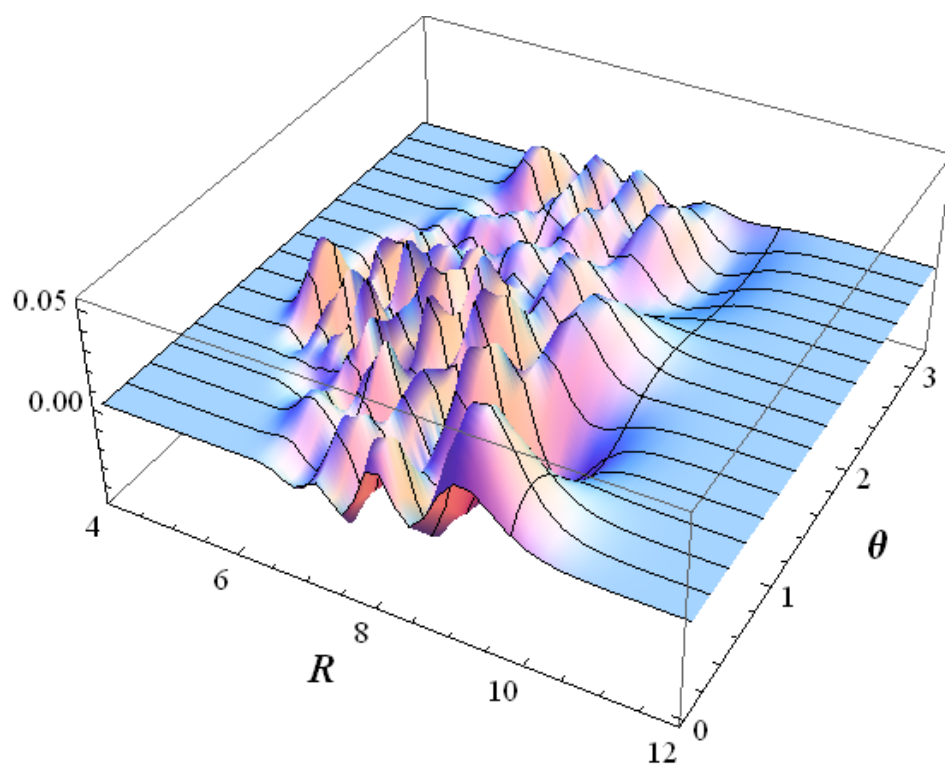

Figure S106. Eigenstate No. 106

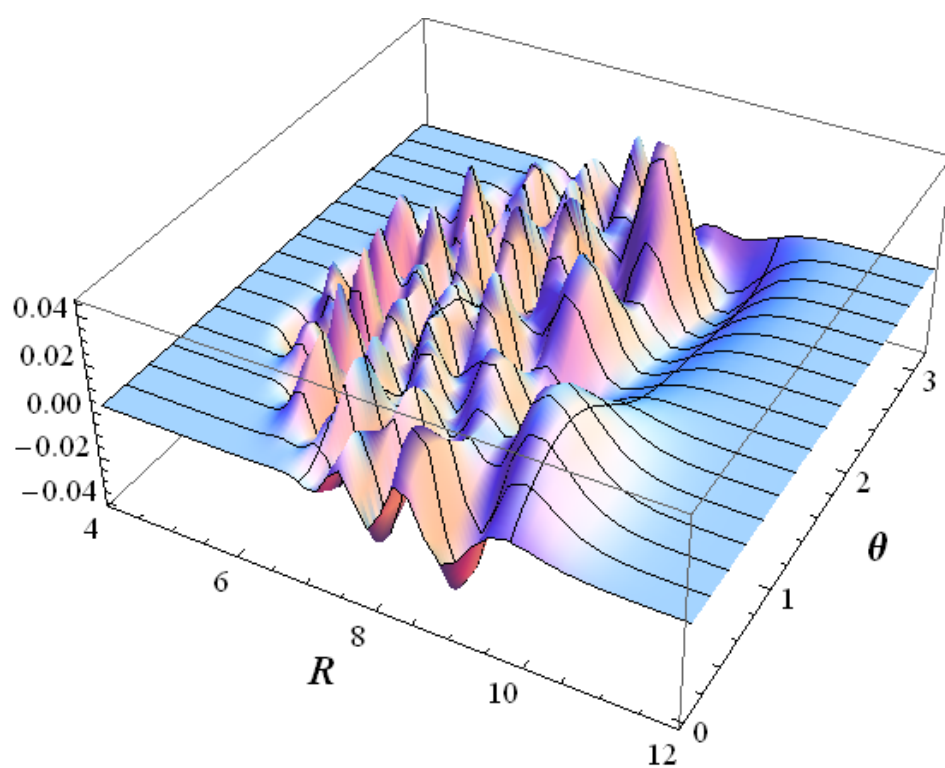

Figure S107. Eigenstate No. 107

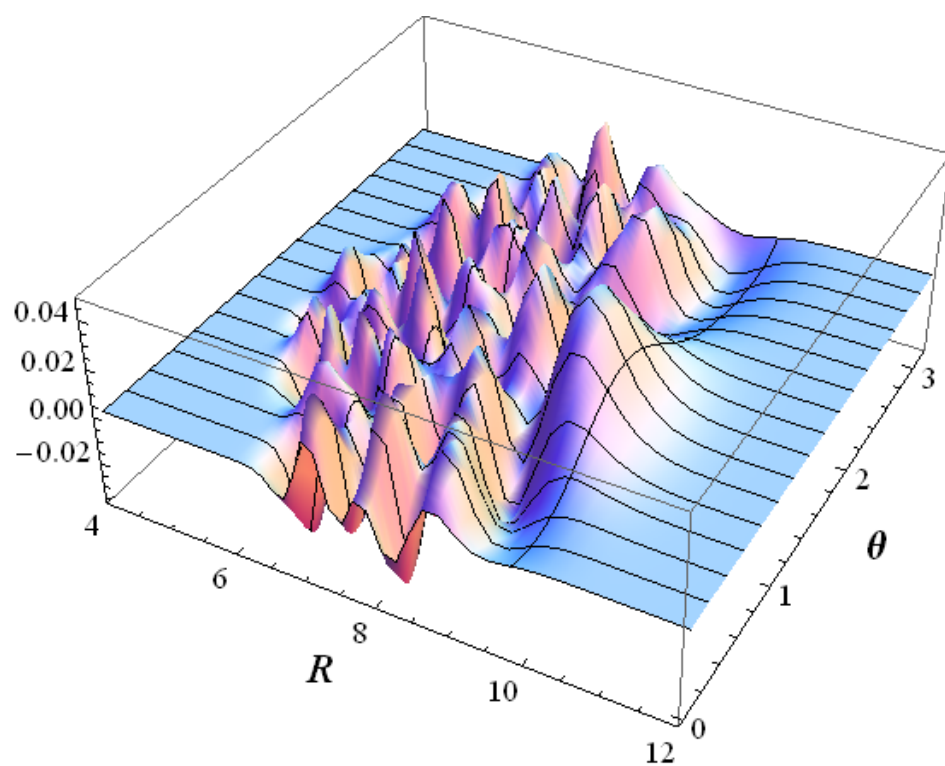

Figure S108. Eigenstate No. 108

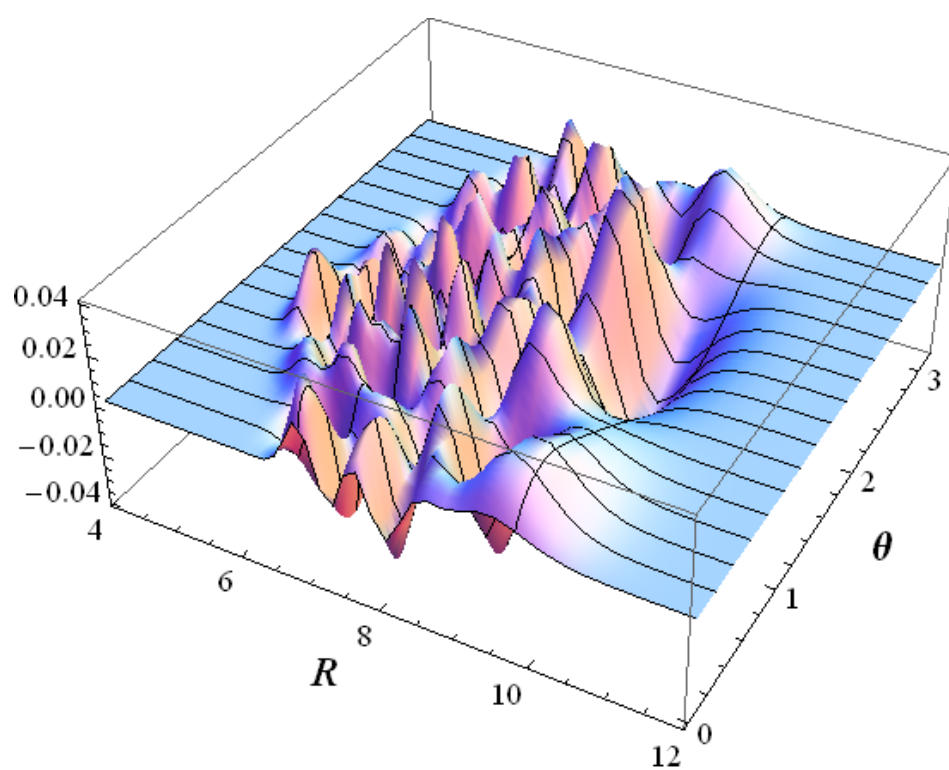

Figure S109. Eigenstate No. 109

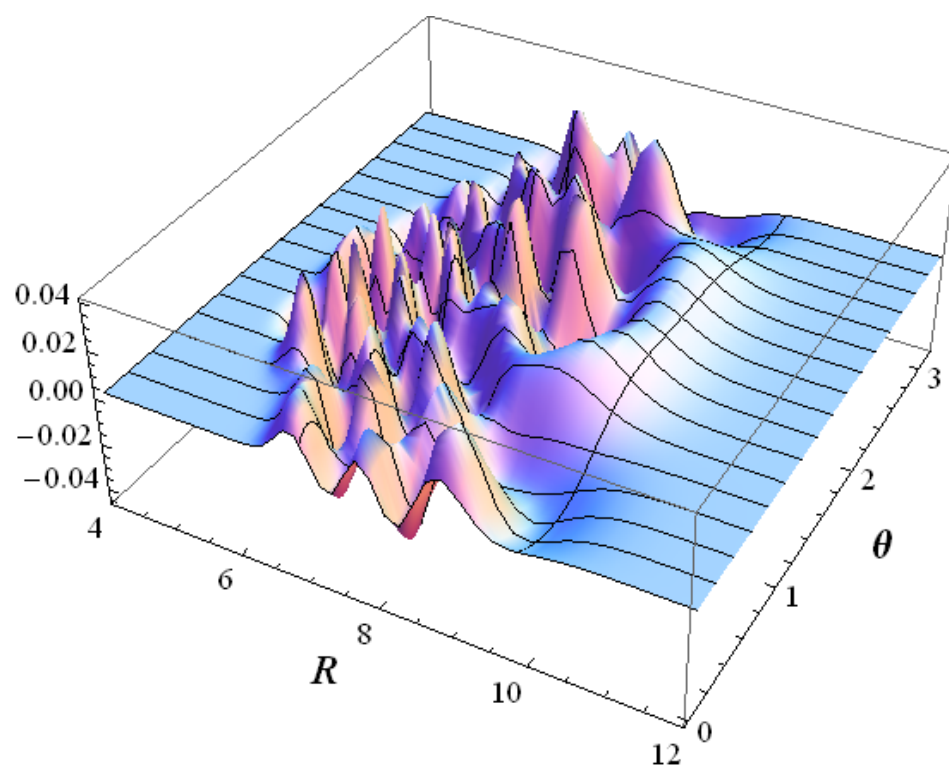

Figure S110. Eigenstate No. 110



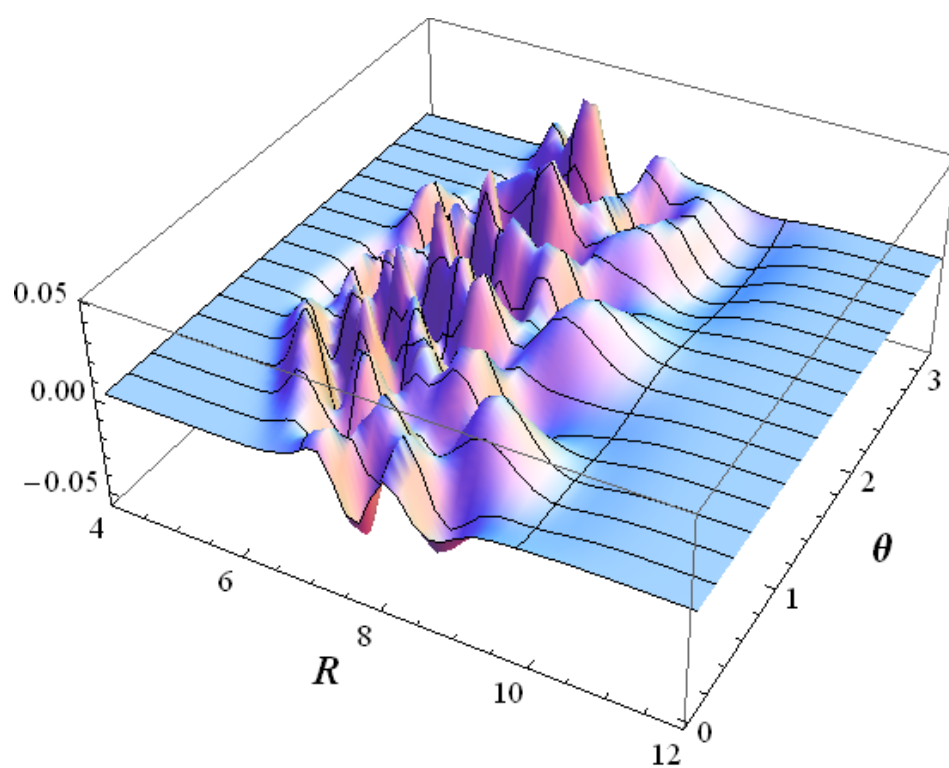

Figure S111. Eigenstate No. 111

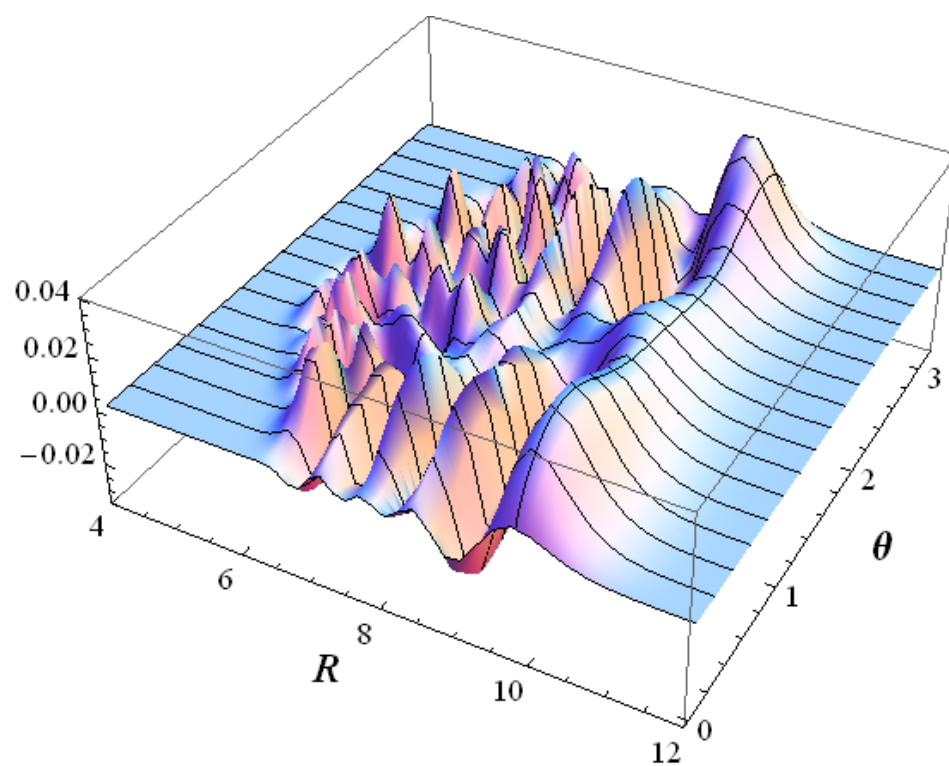

Figure S112. Eigenstate No. 112



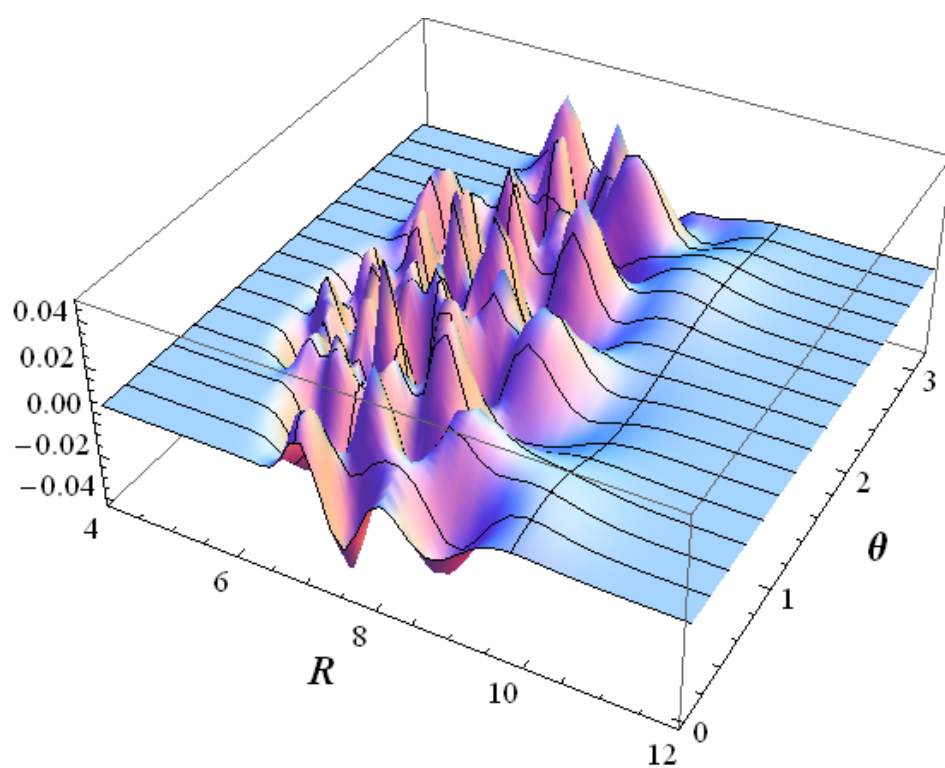

Figure S113. Eigenstate No. 113

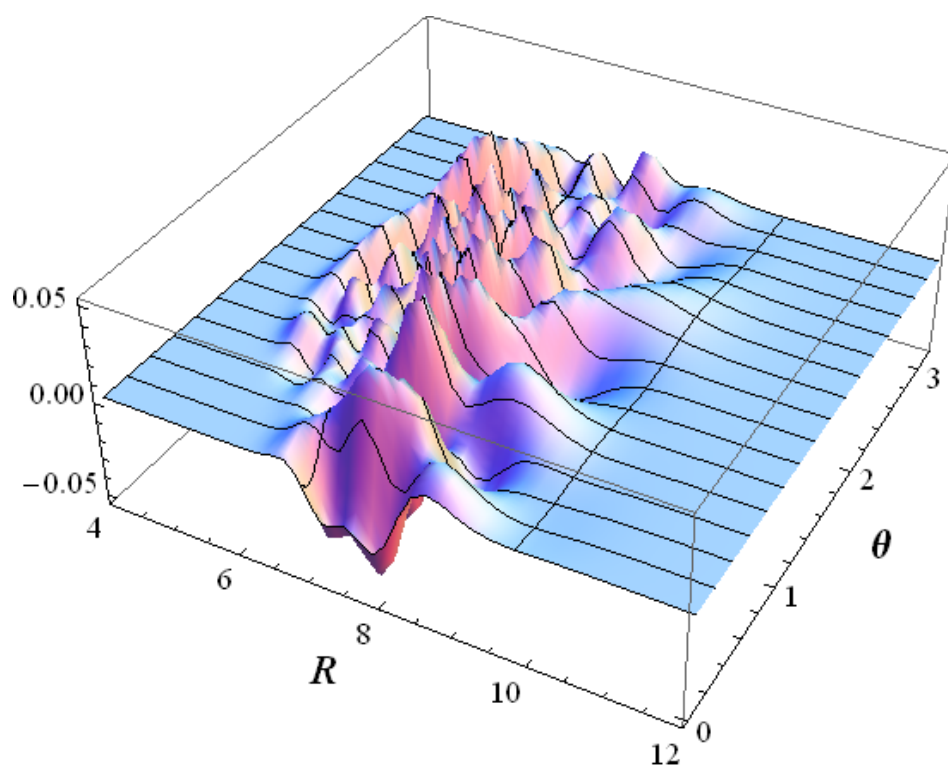

Figure S114. Eigenstate No. 114

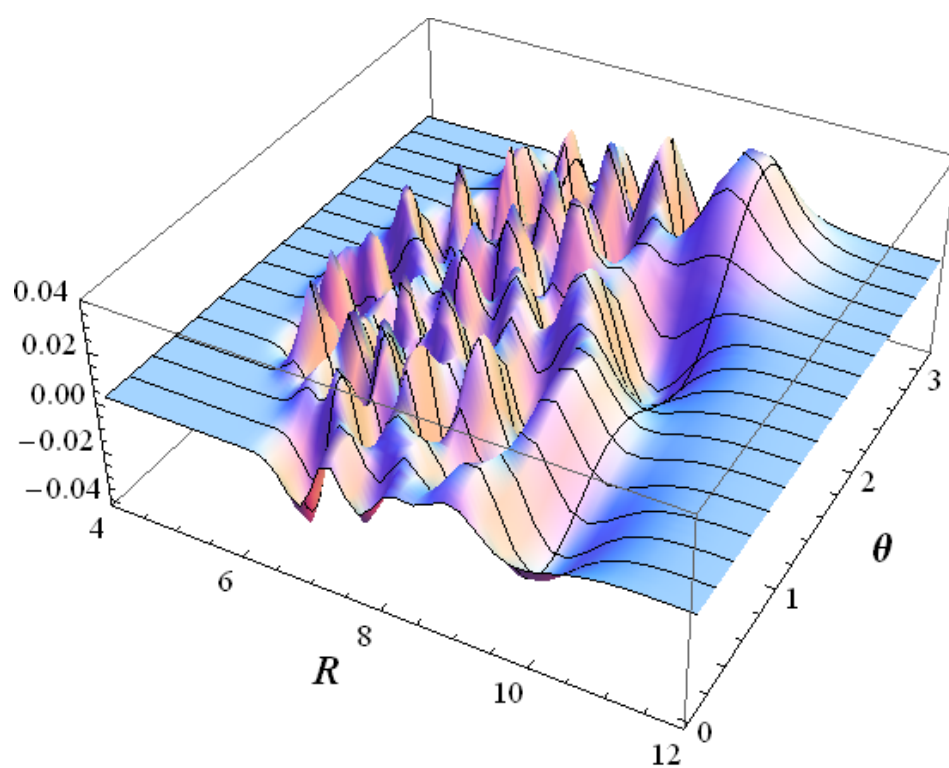

Figure S115. Eigenstate No. 115

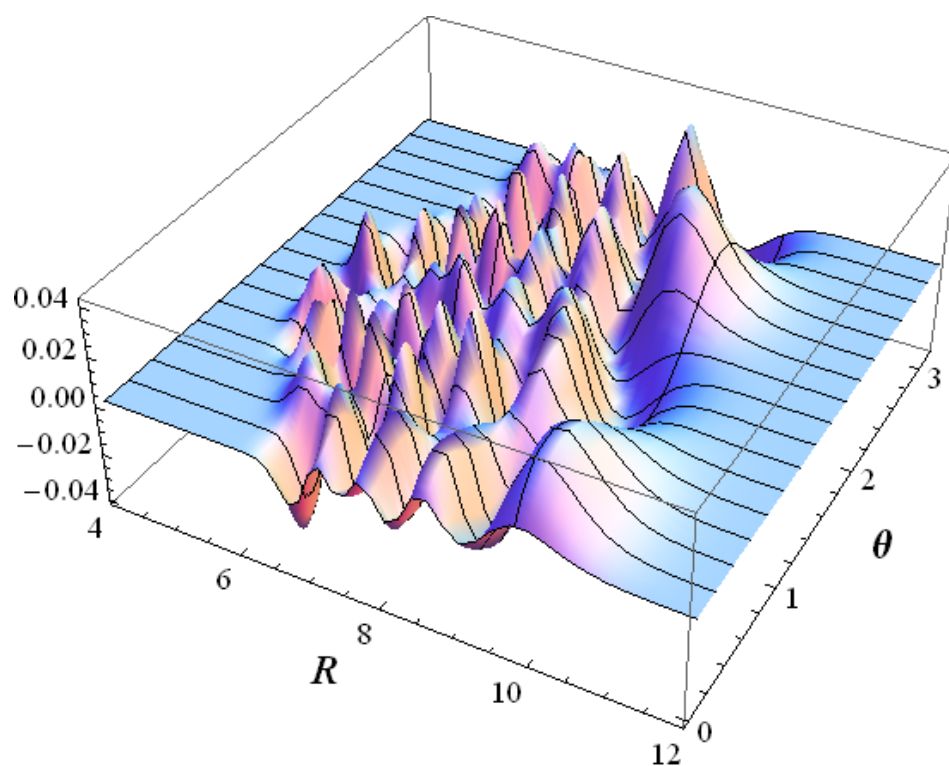

Figure S116. Eigenstate No. 116

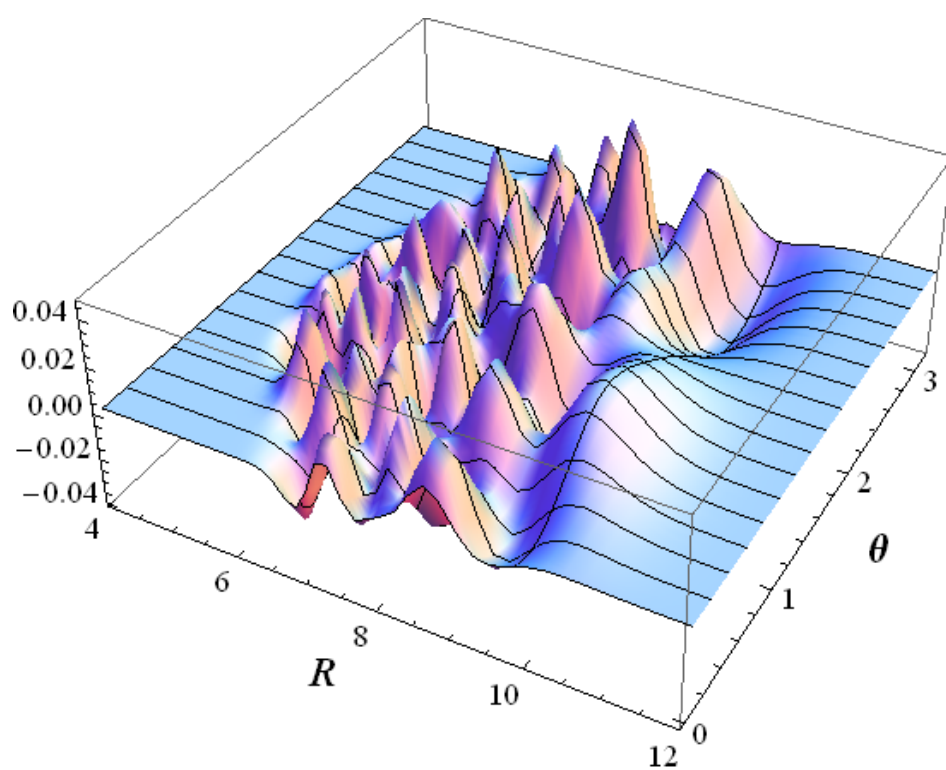

Figure S117. Eigenstate No. 117

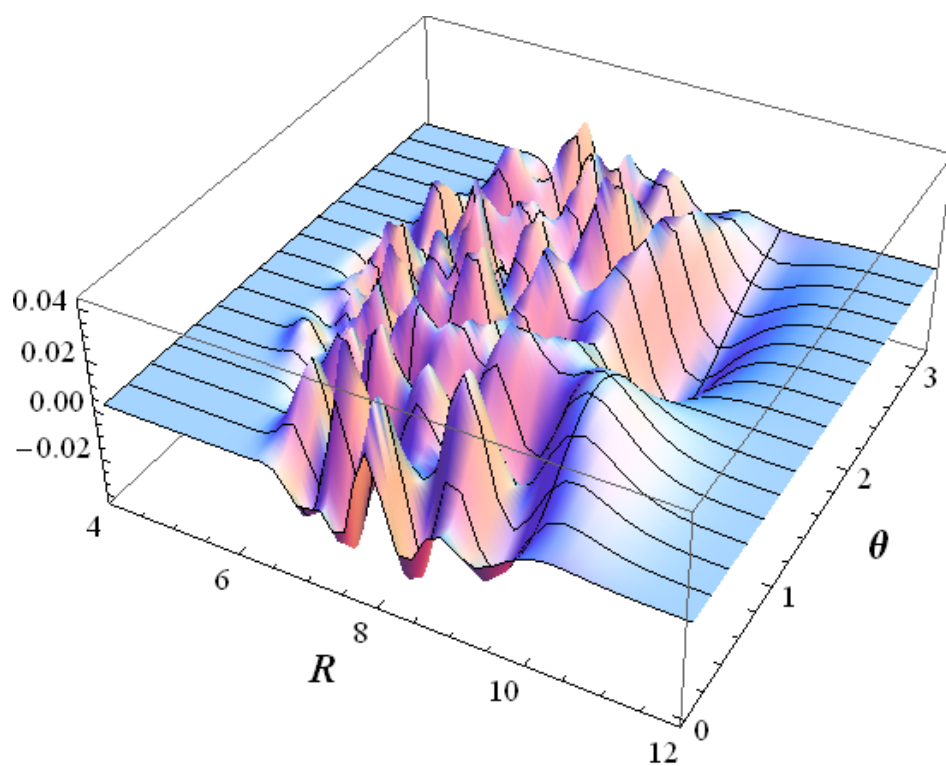

Figure S118. Eigenstate No. 118

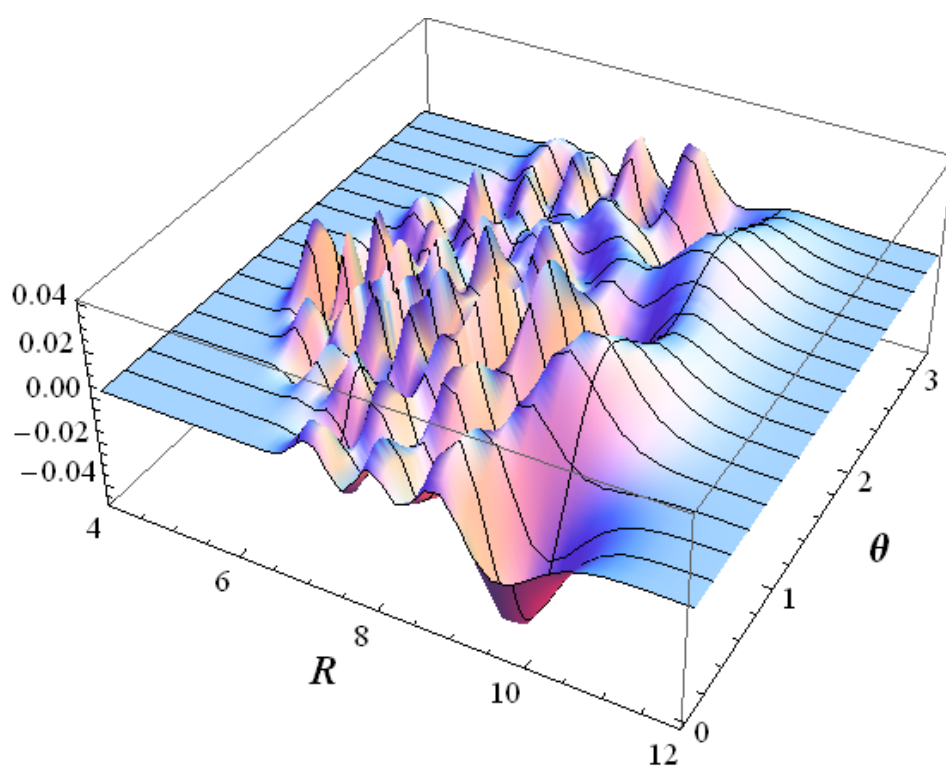

Figure S119. Eigenstate No. 119

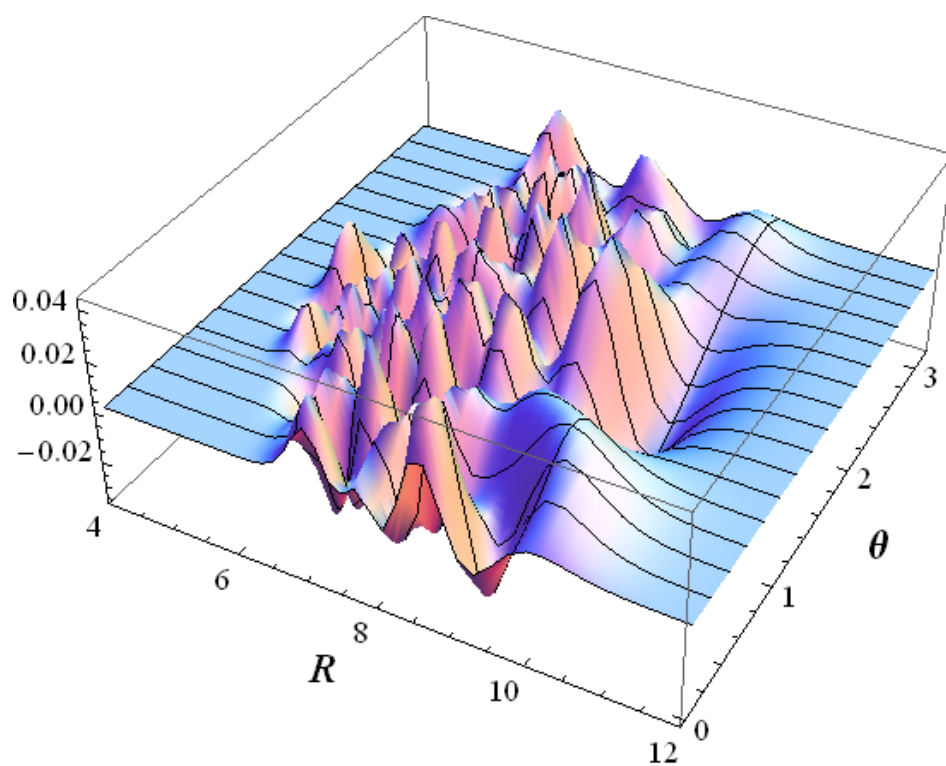

Figure S120. Eigenstate No. 120

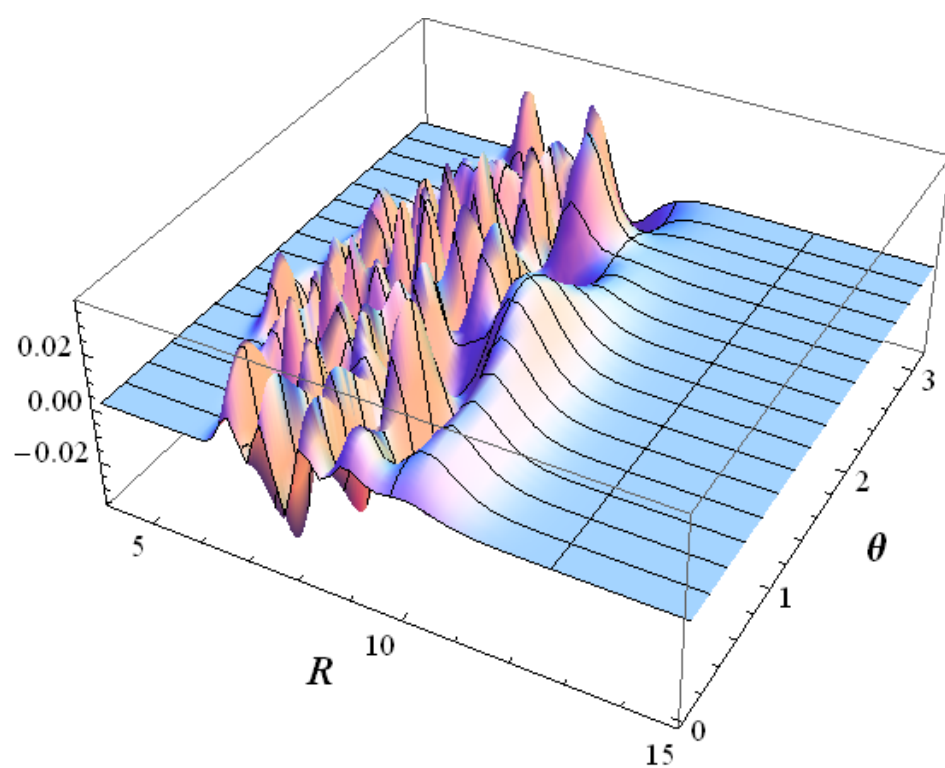

Figure S121. Eigenstate No. 121

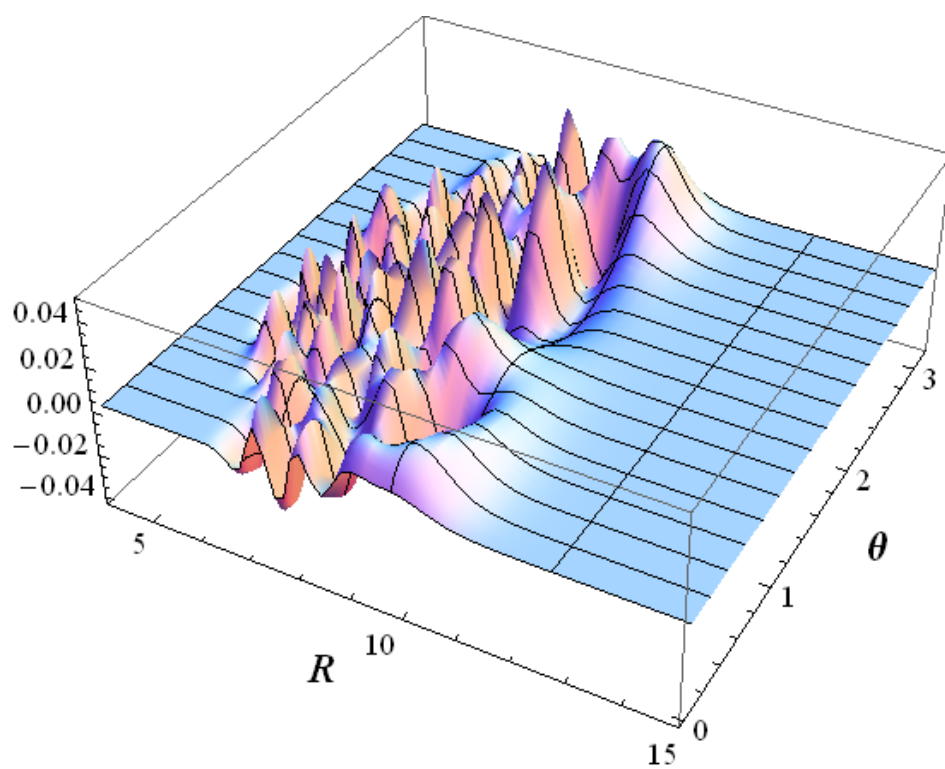

Figure S122. Eigenstate No. 122

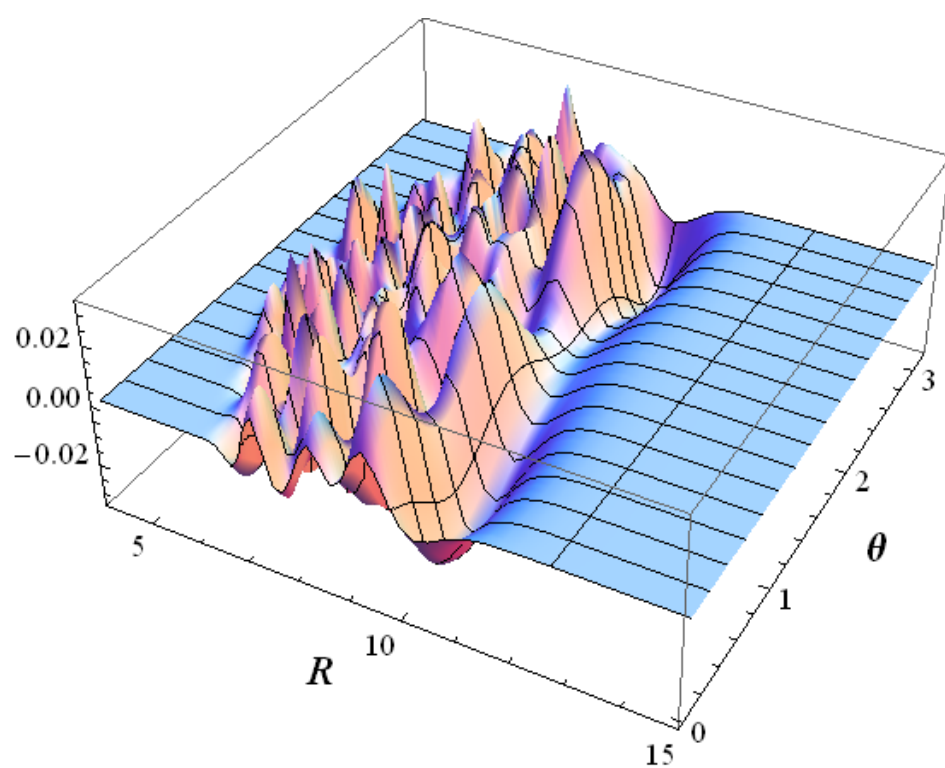

Figure S123. Eigenstate No. 123

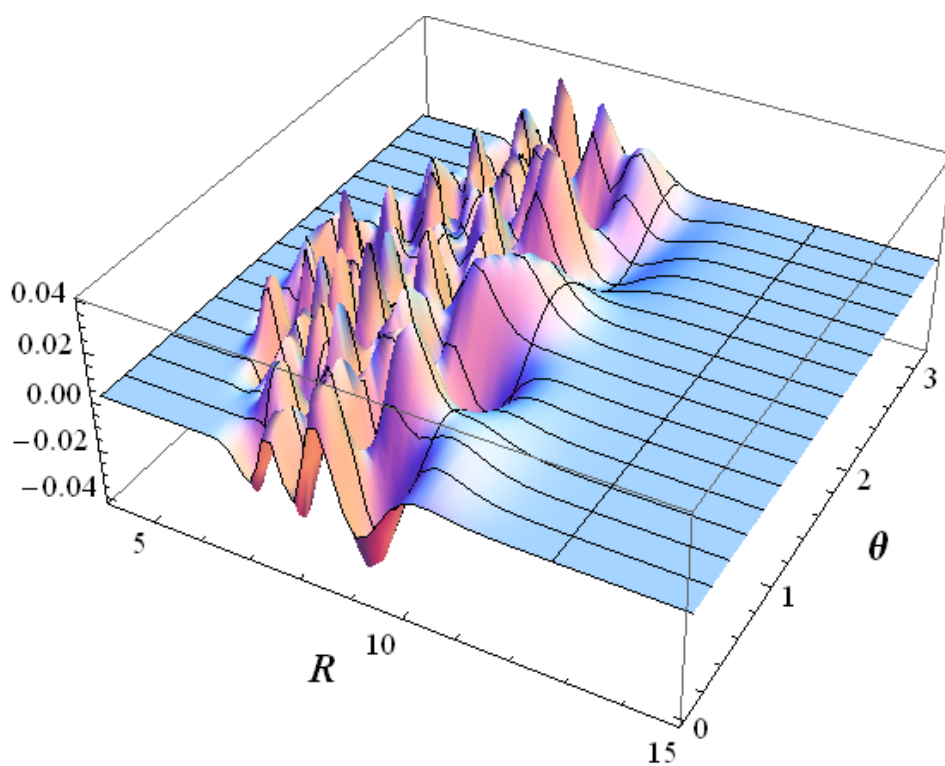

Figure S124. Eigenstate No. 124



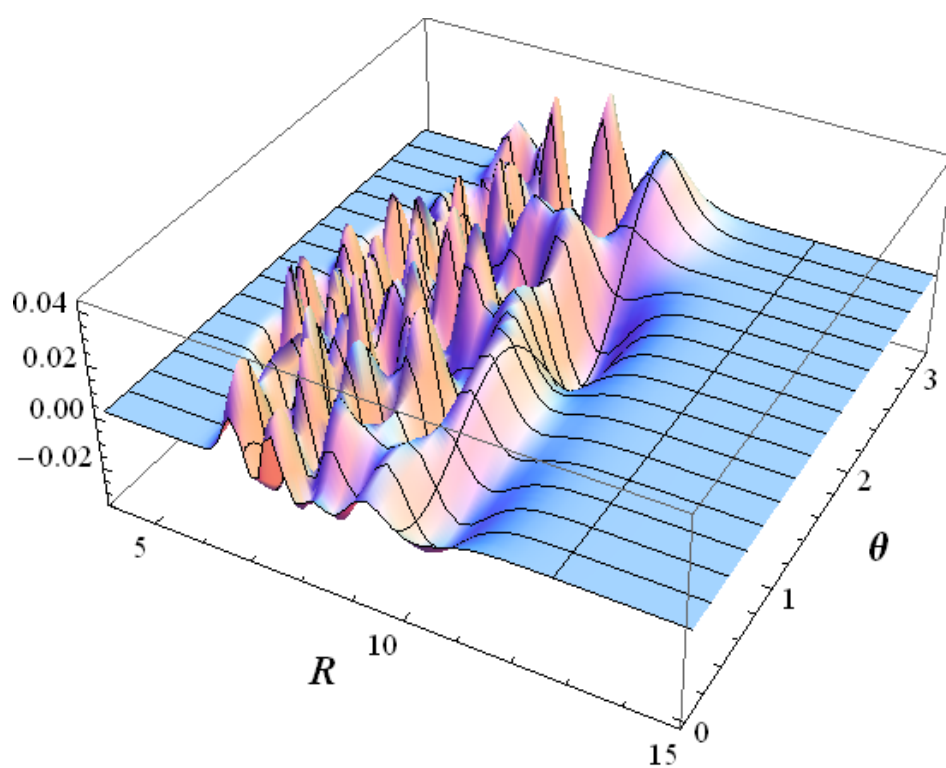

Figure S125. Eigenstate No. 125

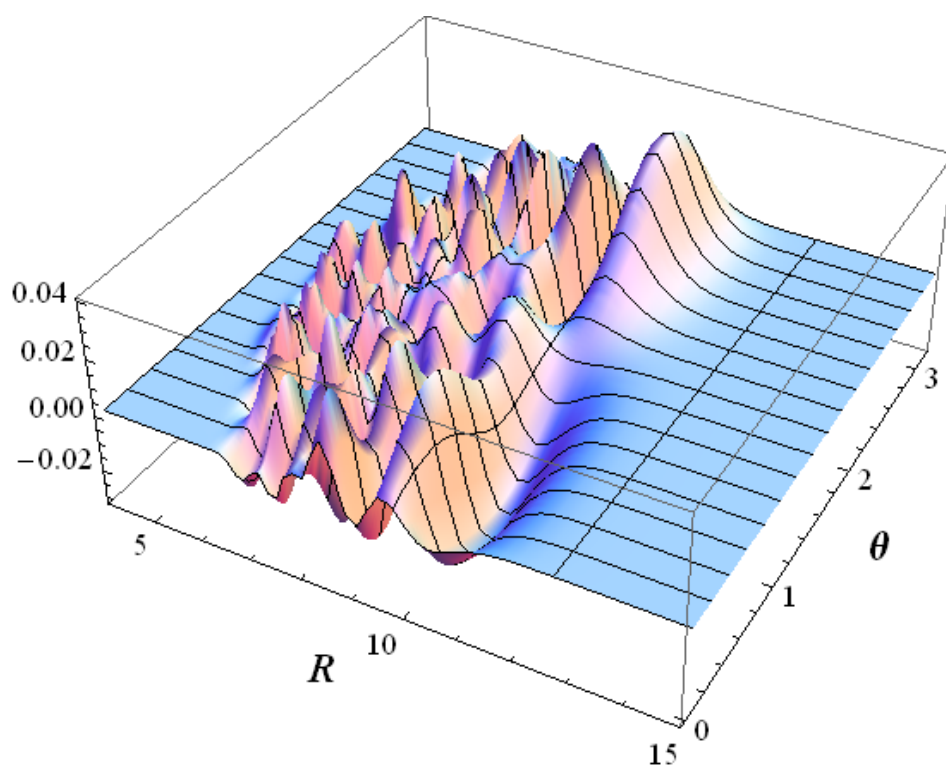

Figure S126. Eigenstate No. 126



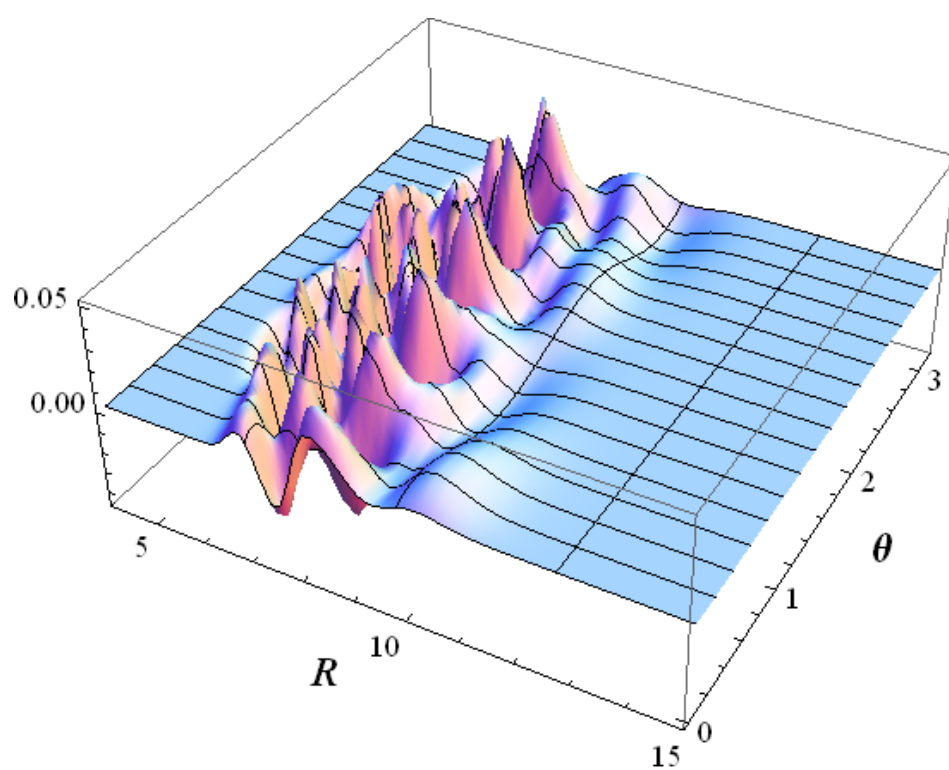

Figure S127. Eigenstate No. 127

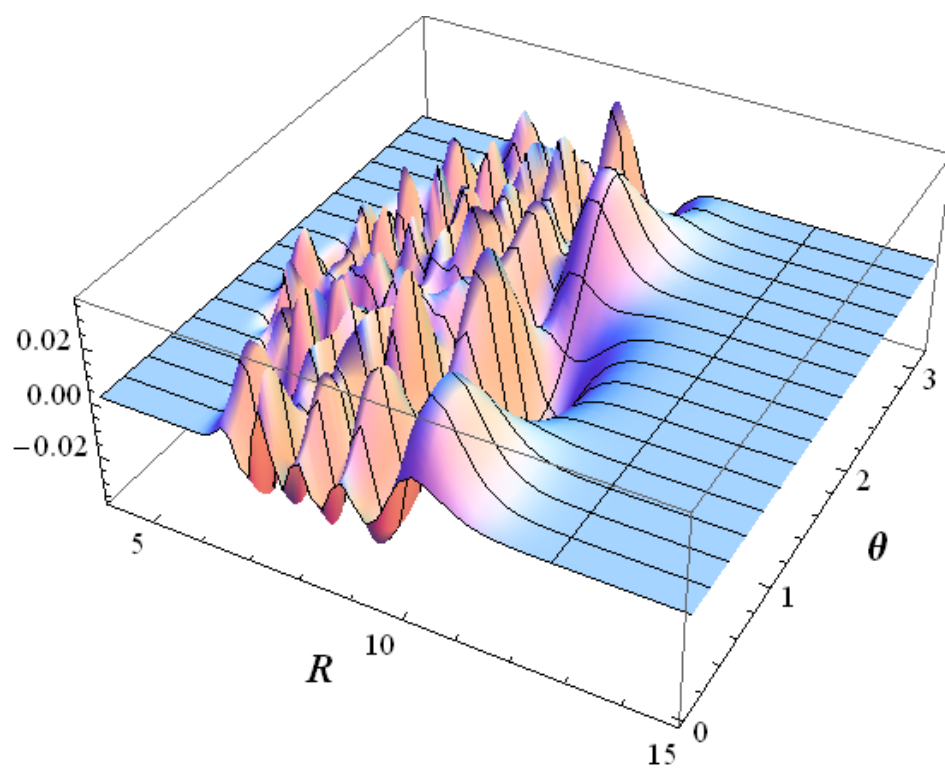

Figure S128. Eigenstate No. 128

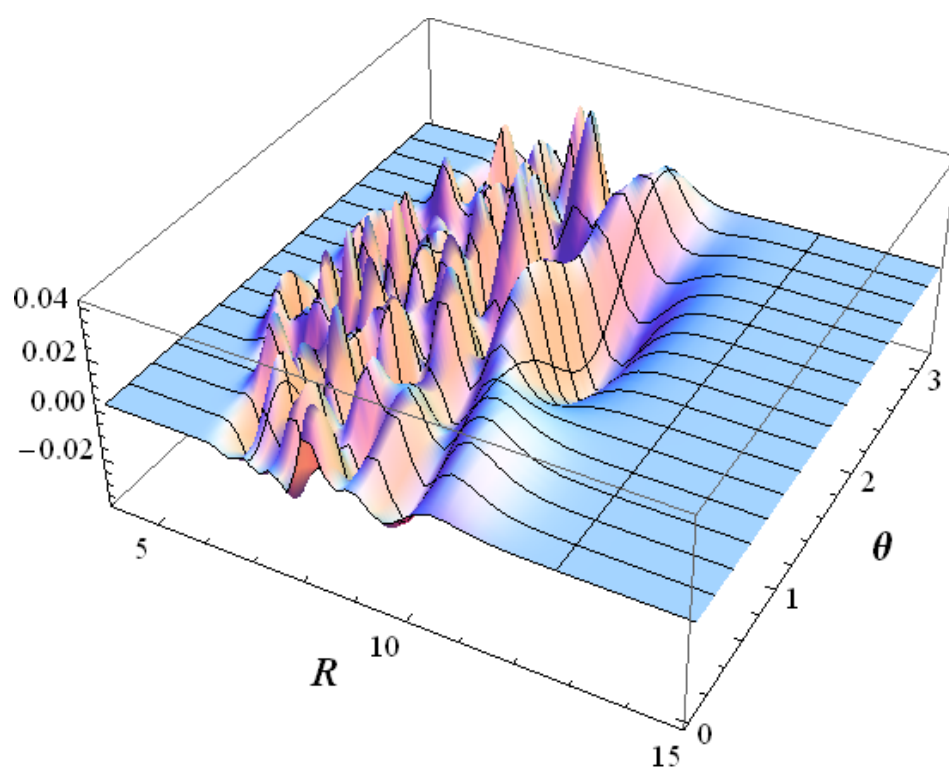

Figure S129. Eigenstate No. 129

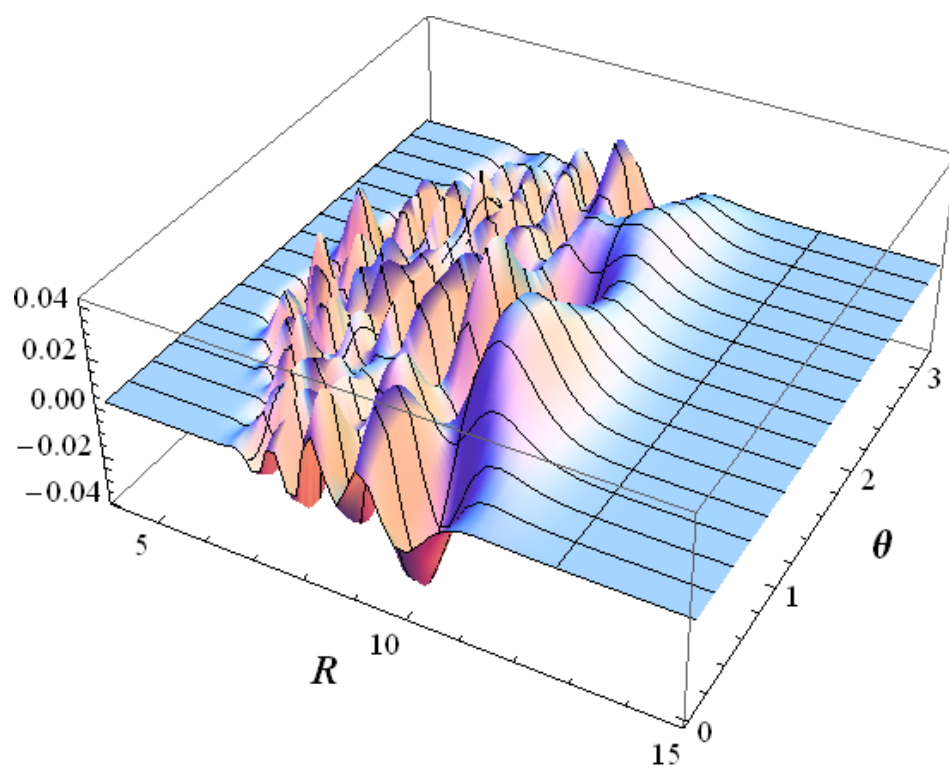

Figure S130. Eigenstate No. 130

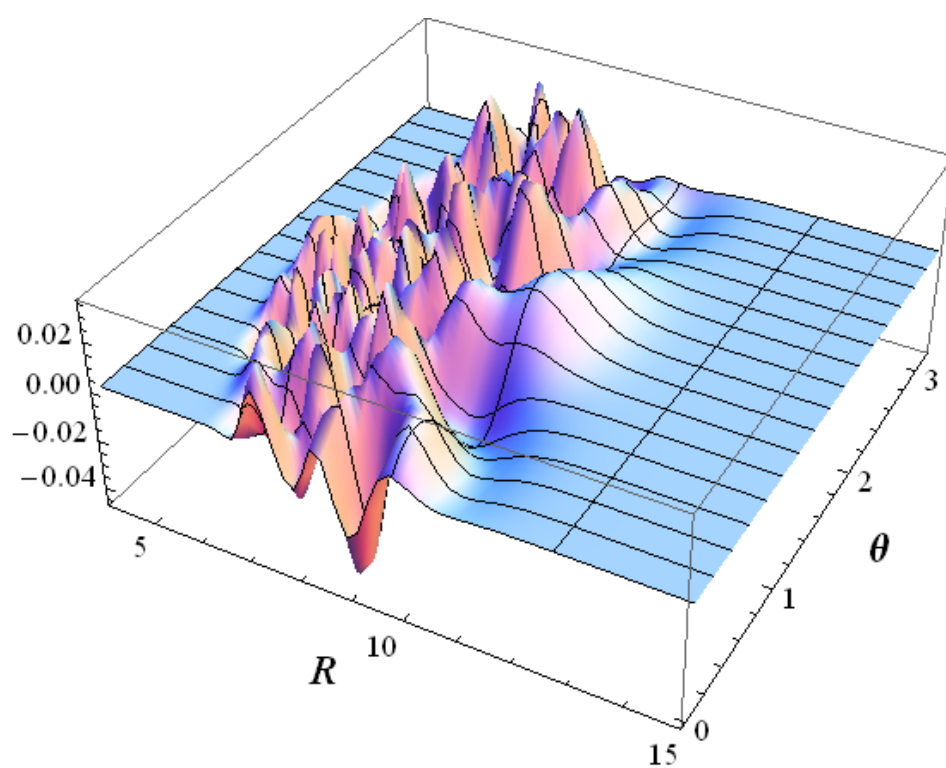

Figure S131. Eigenstate No. 131

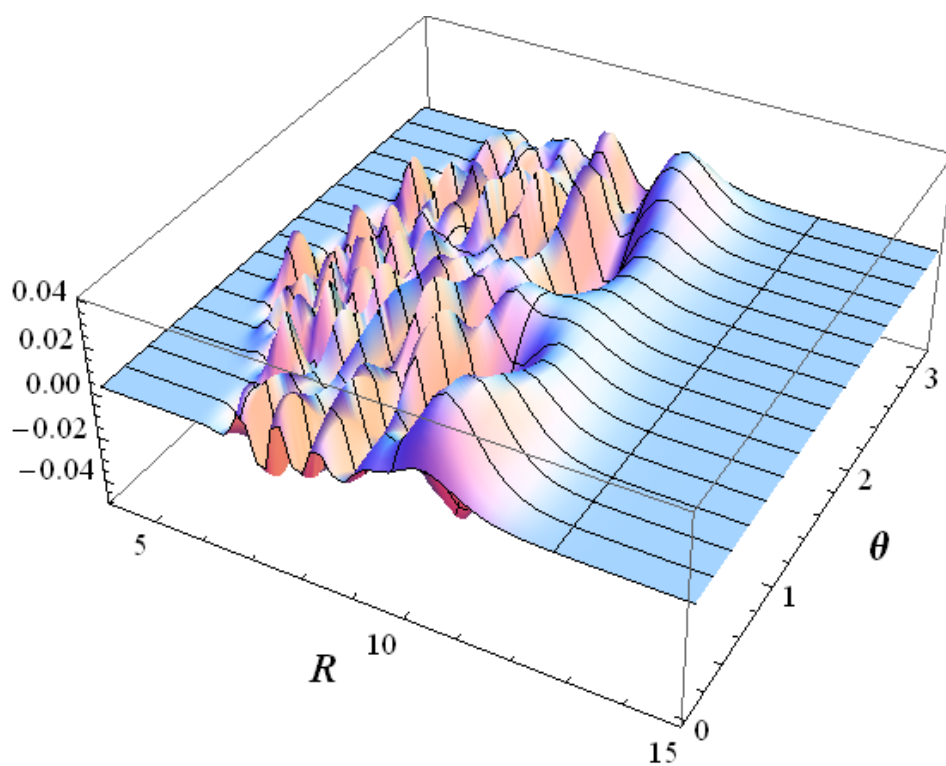

Figure S132. Eigenstate No. 132

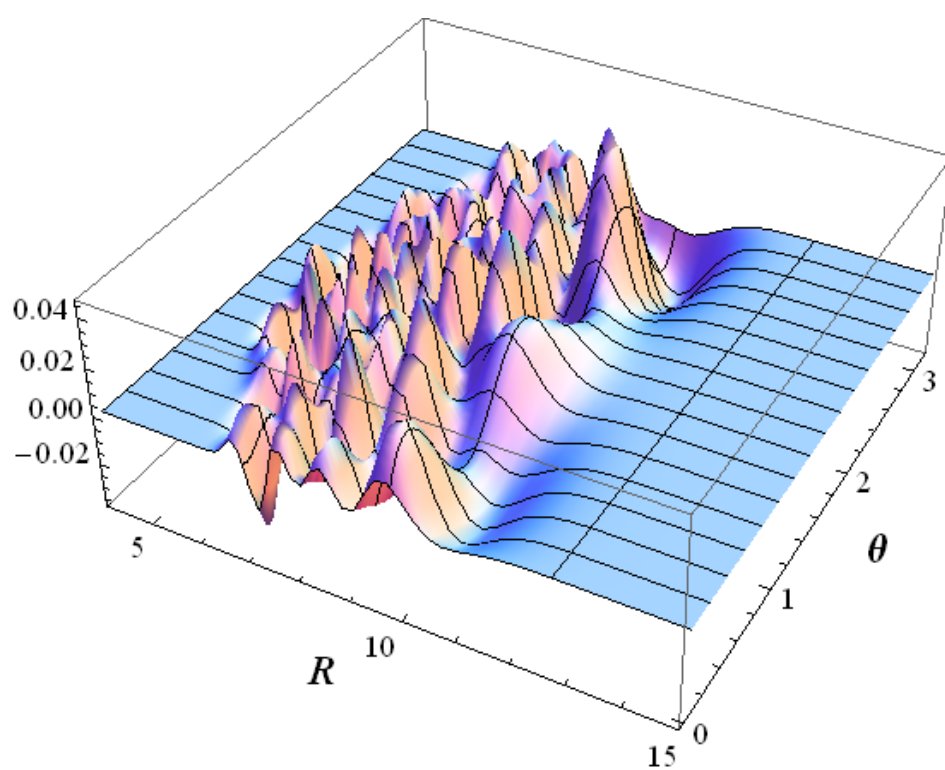

Figure S133. Eigenstate No. 133

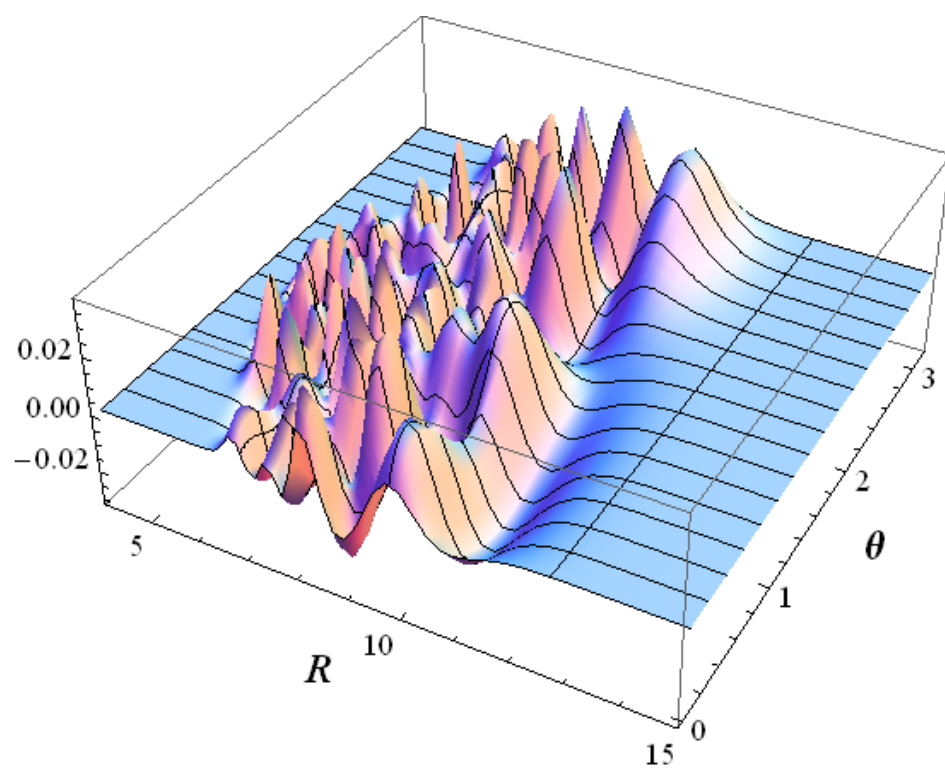

Figure S134. Eigenstate No. 134

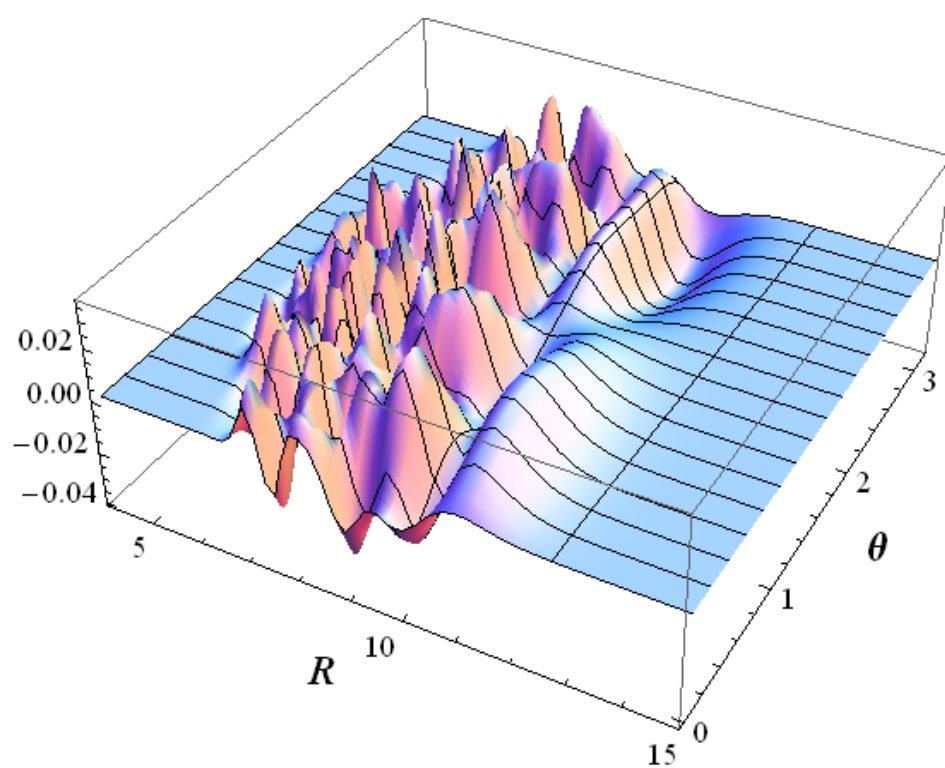

Figure S135. Eigenstate No. 135

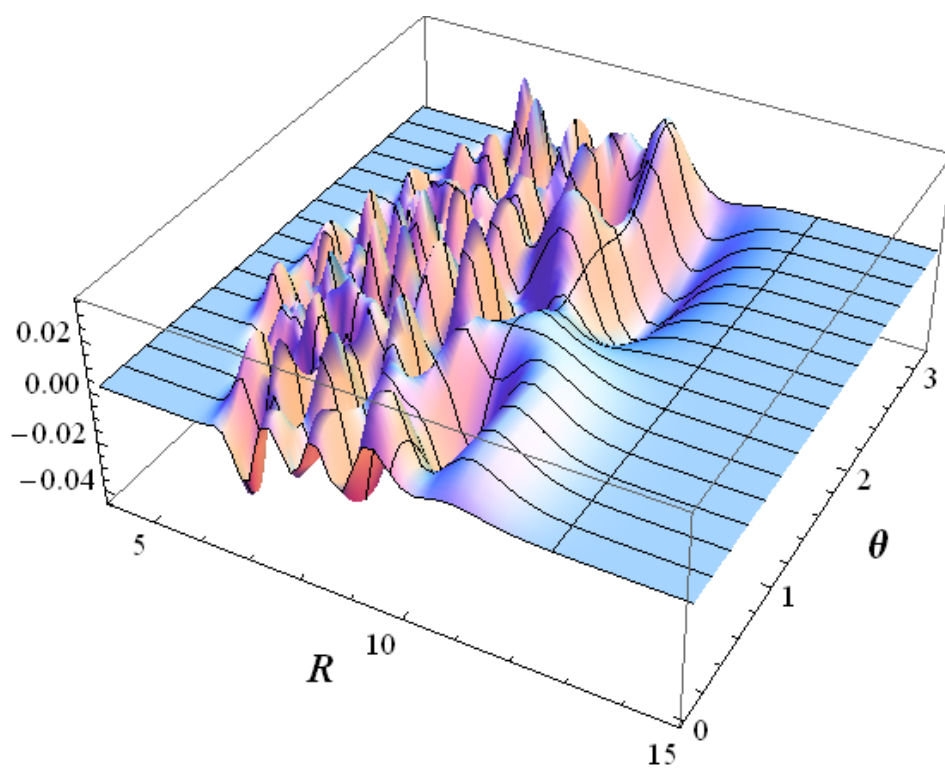

Figure S136. Eigenstate No. 136

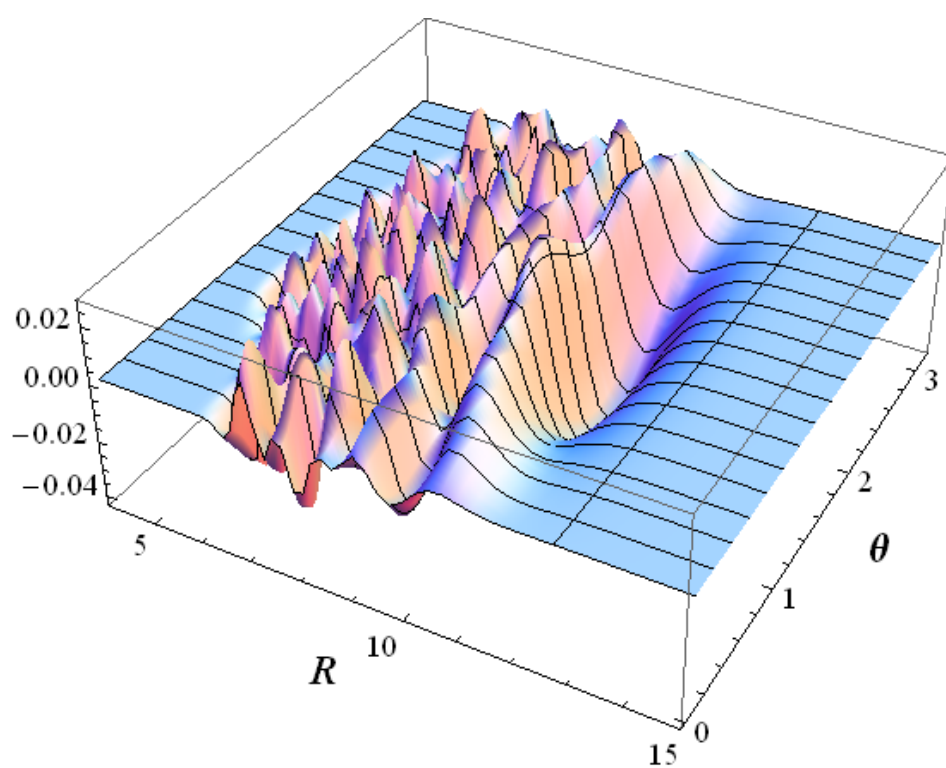

Figure S137. Eigenstate No. 137

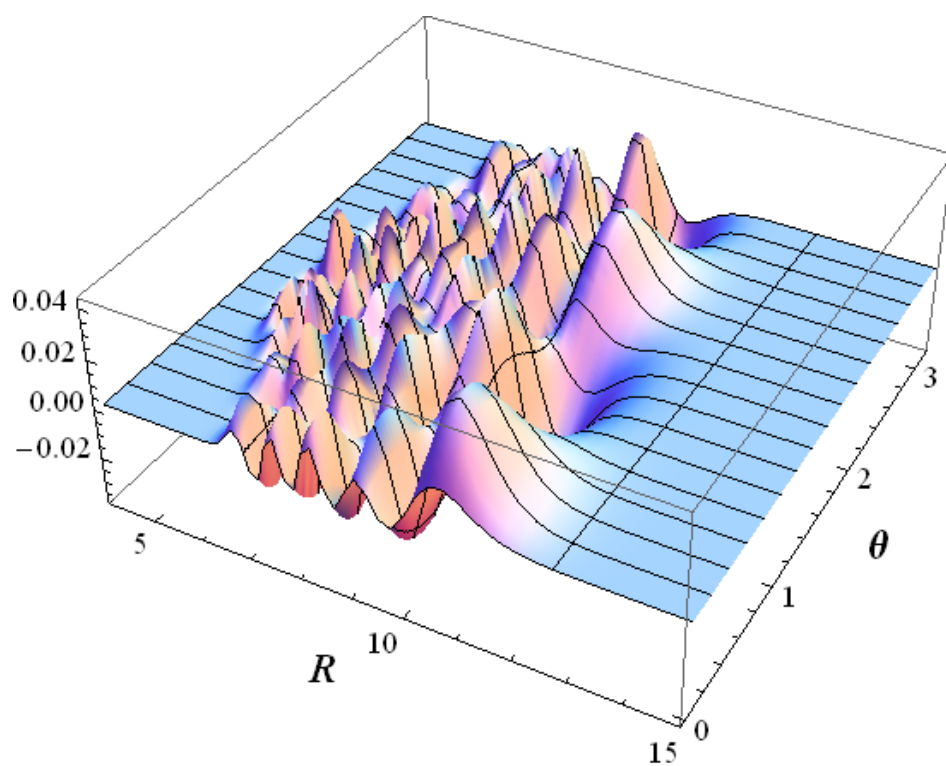

Figure S138. Eigenstate No. 138



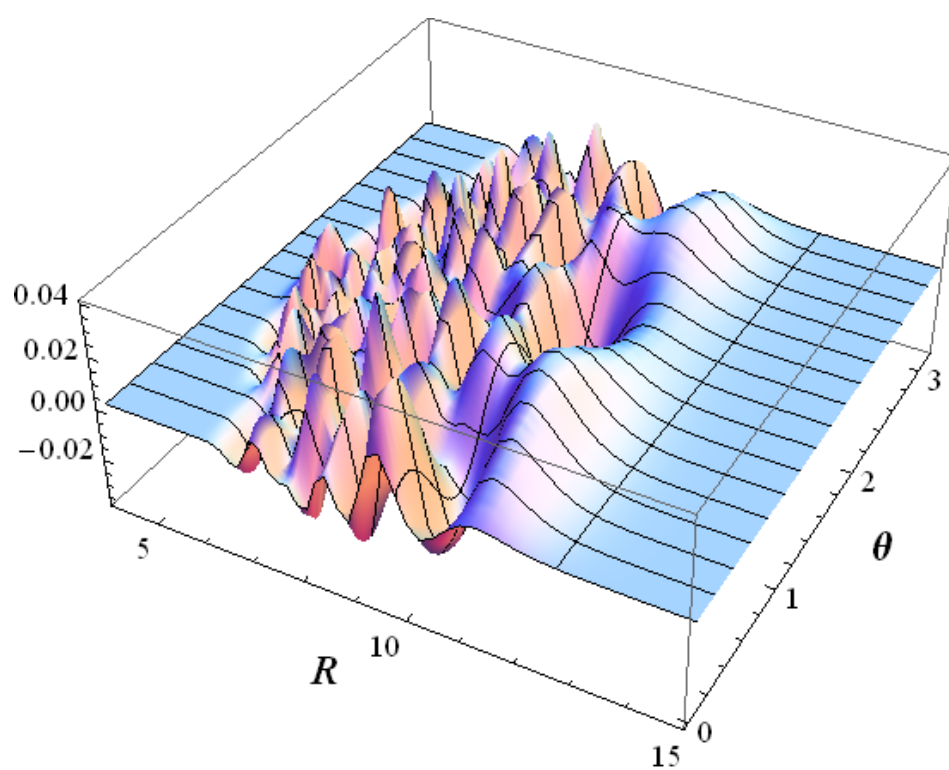

Figure S139. Eigenstate No. 139

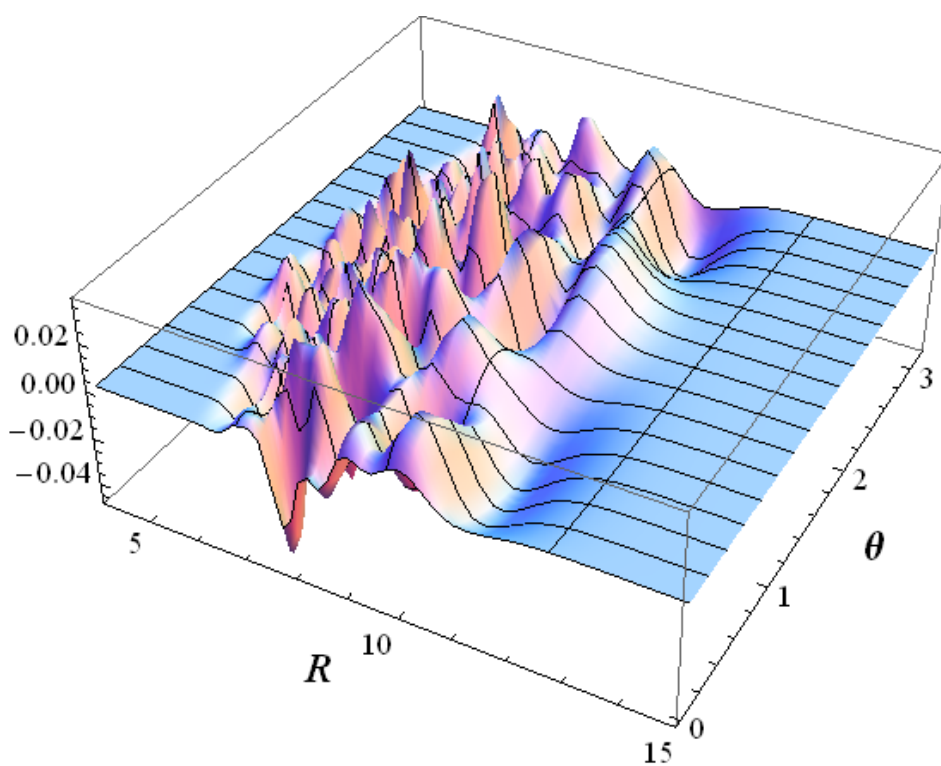

Figure S140. Eigenstate No. 140



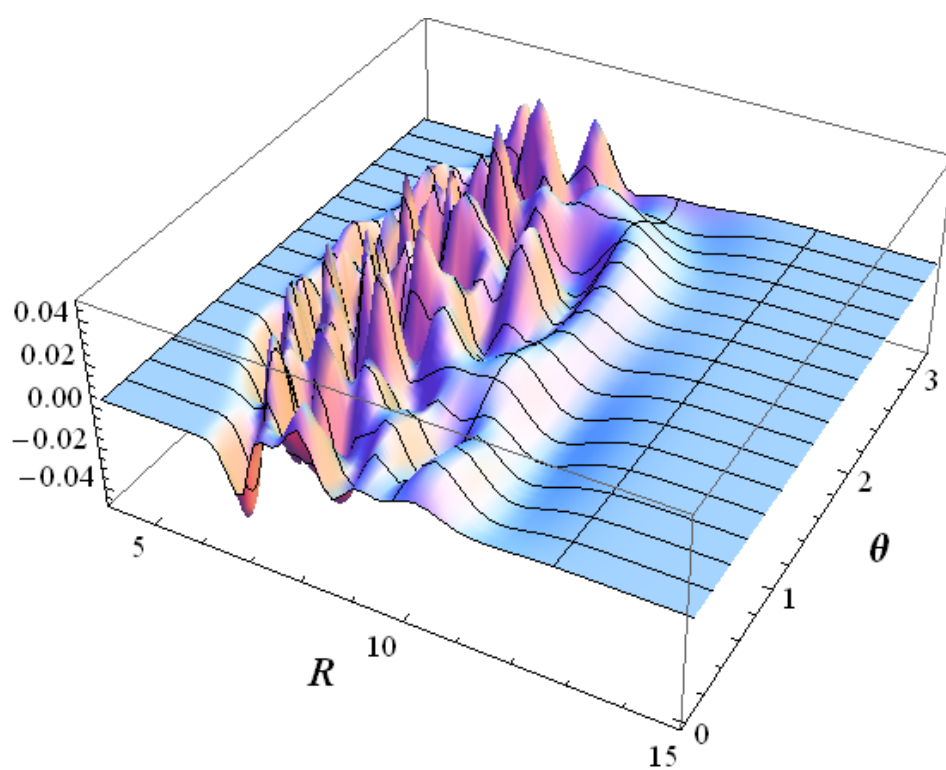

Figure S141. Eigenstate No. 141

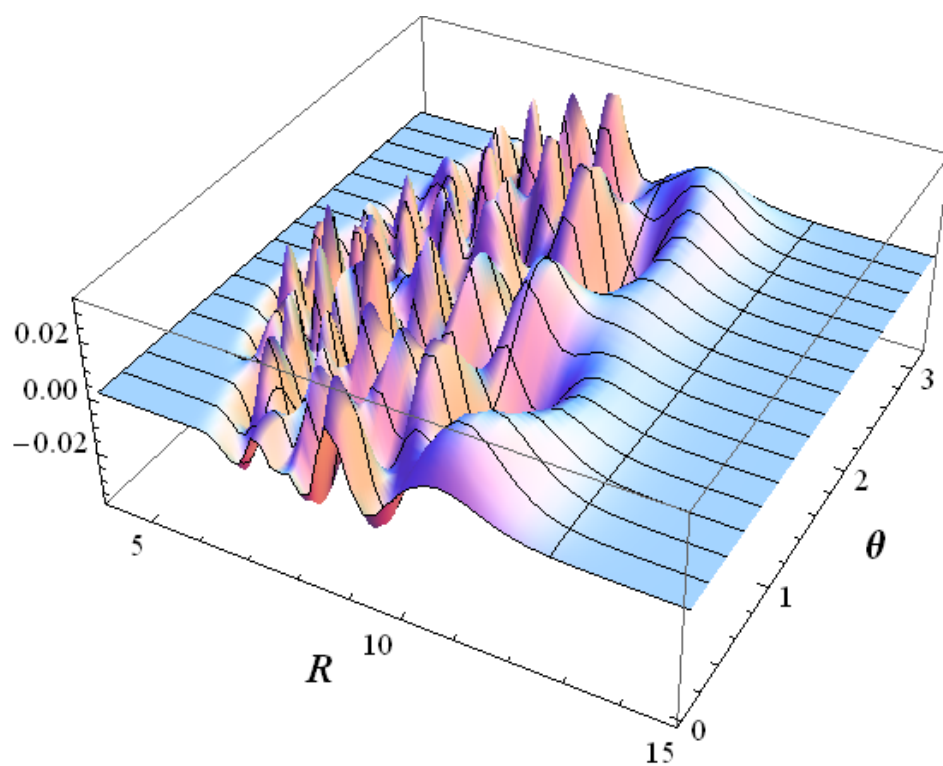

Figure S142. Eigenstate No. 142

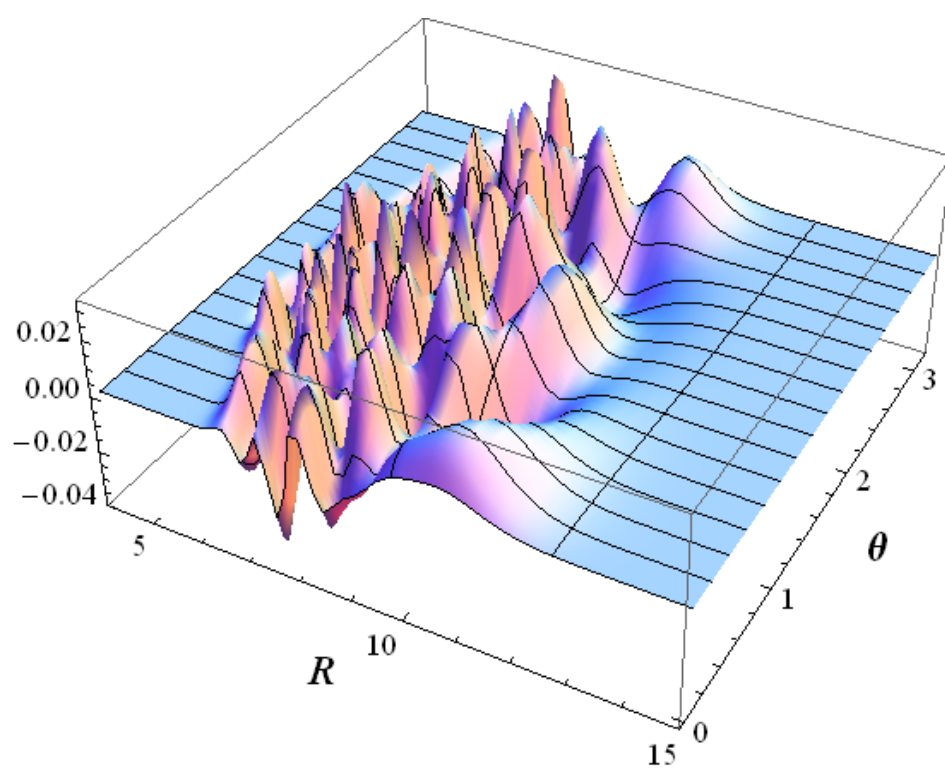

Figure S143. Eigenstate No. 143

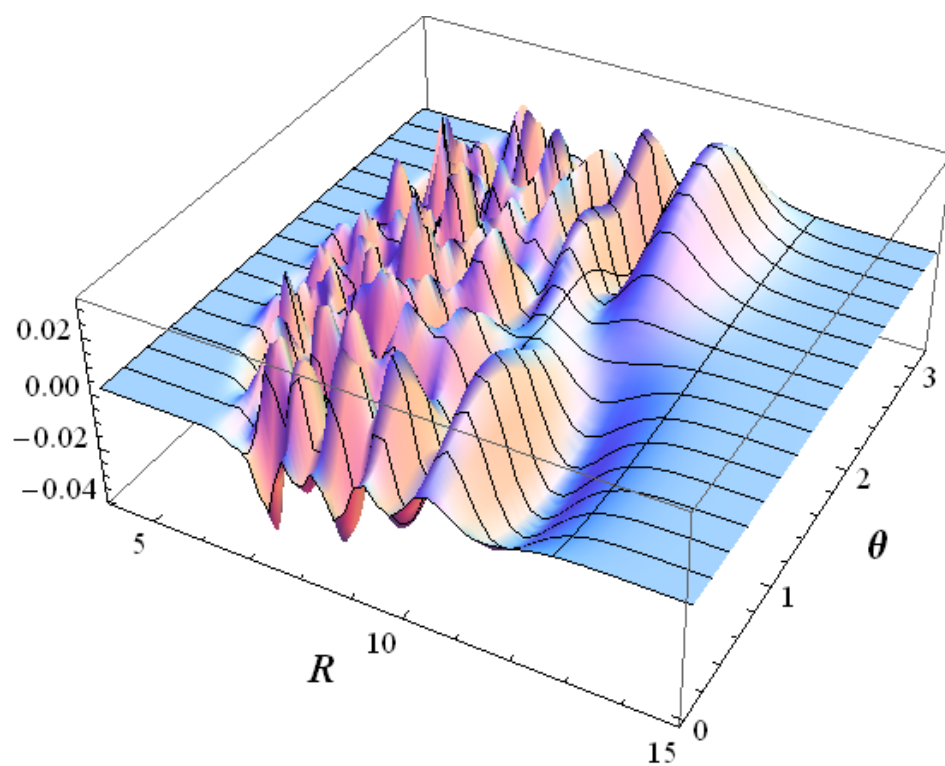

Figure S144. Eigenstate No. 144

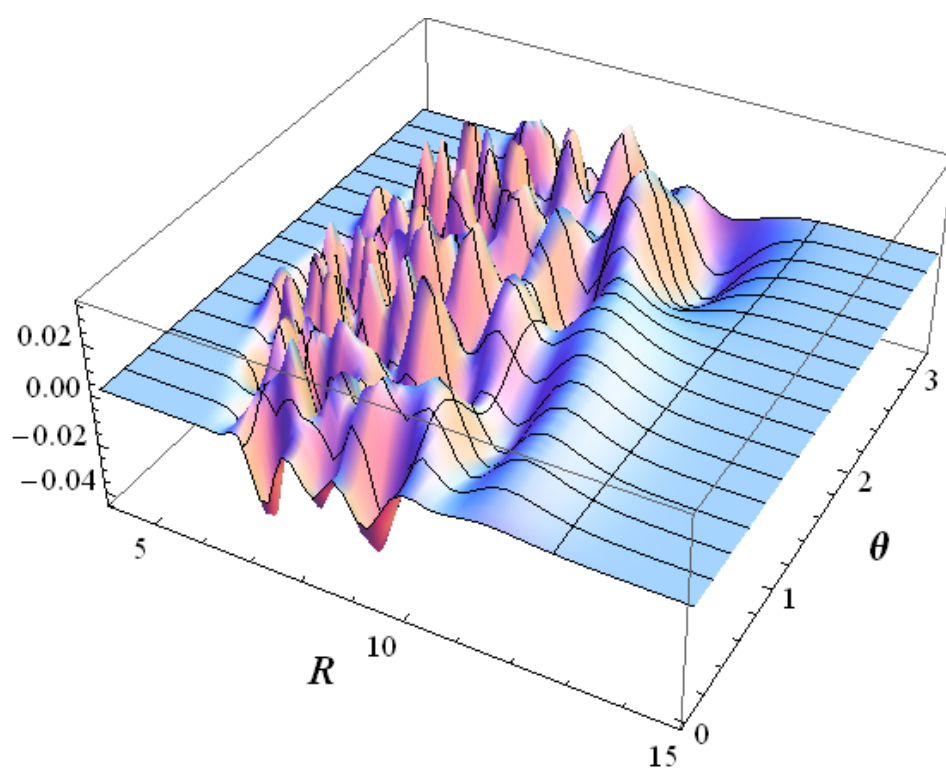

Figure S145. Eigenstate No. 145

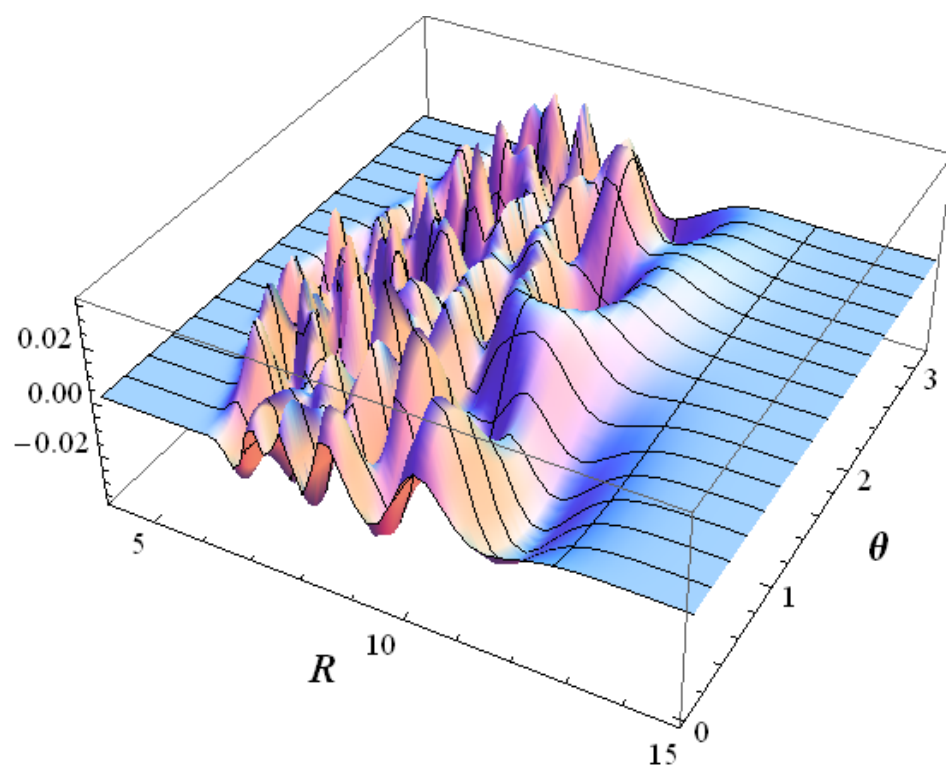

Figure S146. Eigenstate No. 146

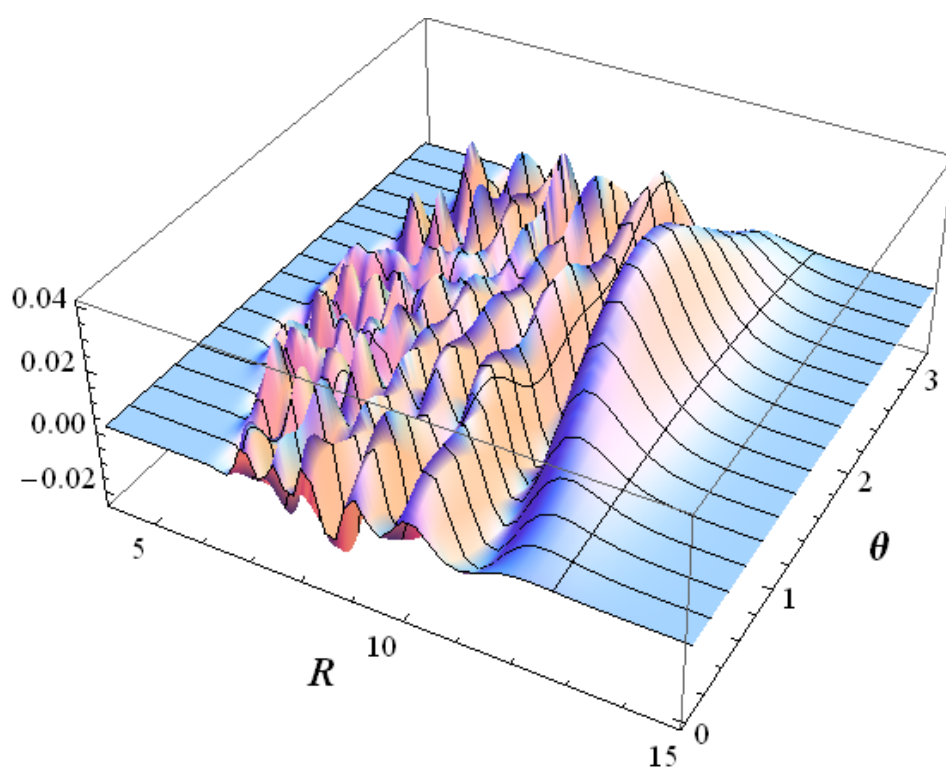

Figure S147. Eigenstate No. 147

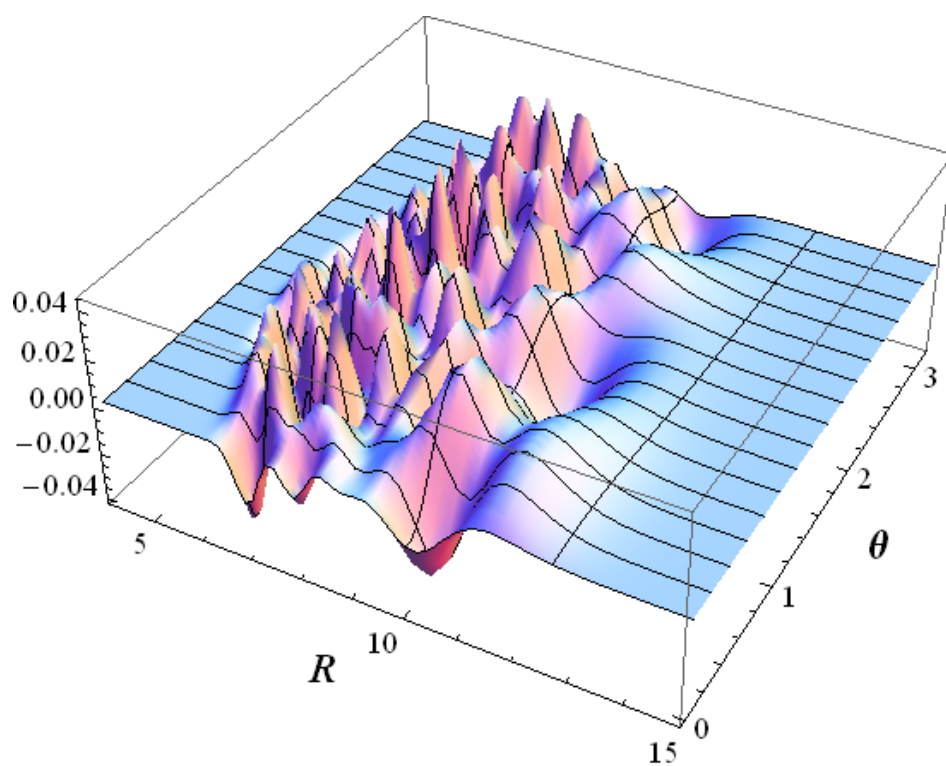

Figure S148. Eigenstate No. 148

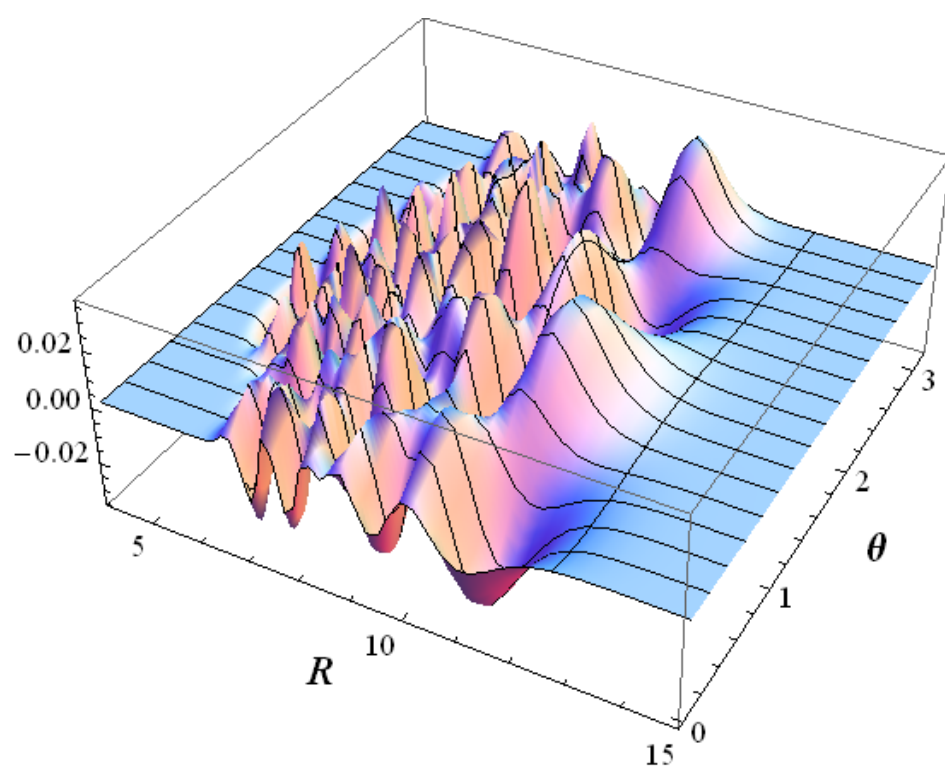

Figure S149. Eigenstate No. 149

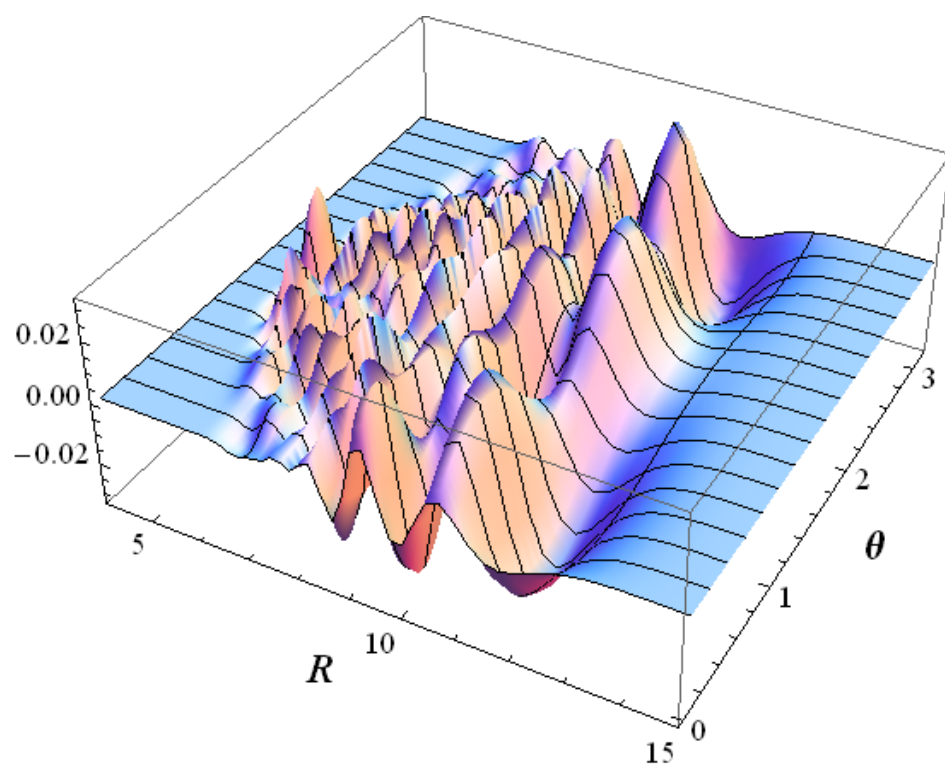

Figure S150. Eigenstate No. 150



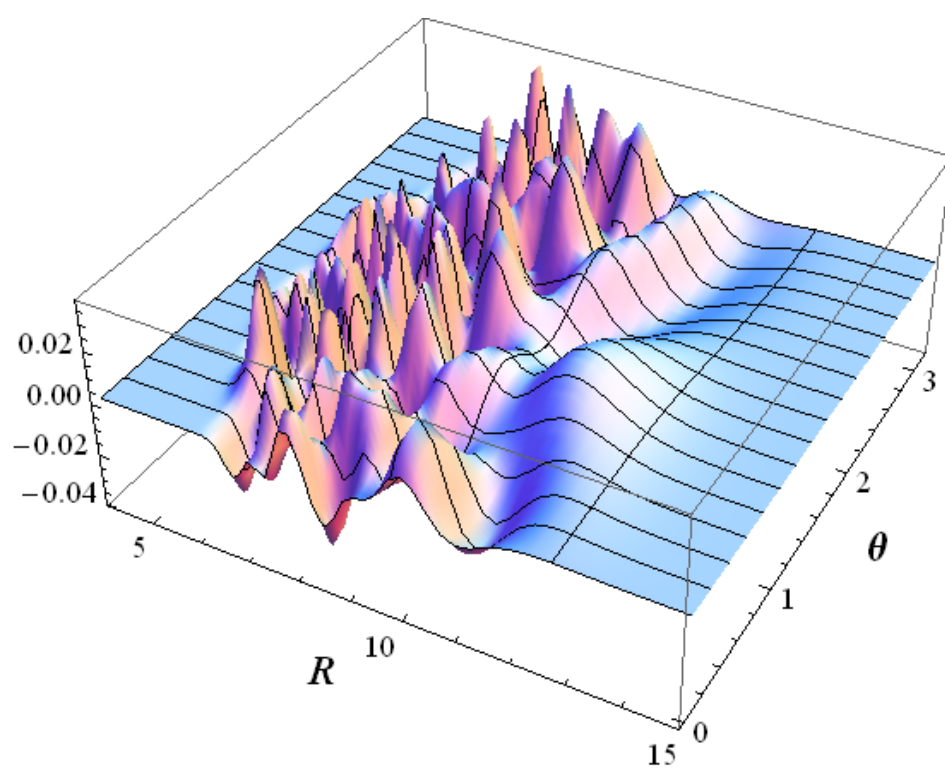

Figure S151. Eigenstate No. 151

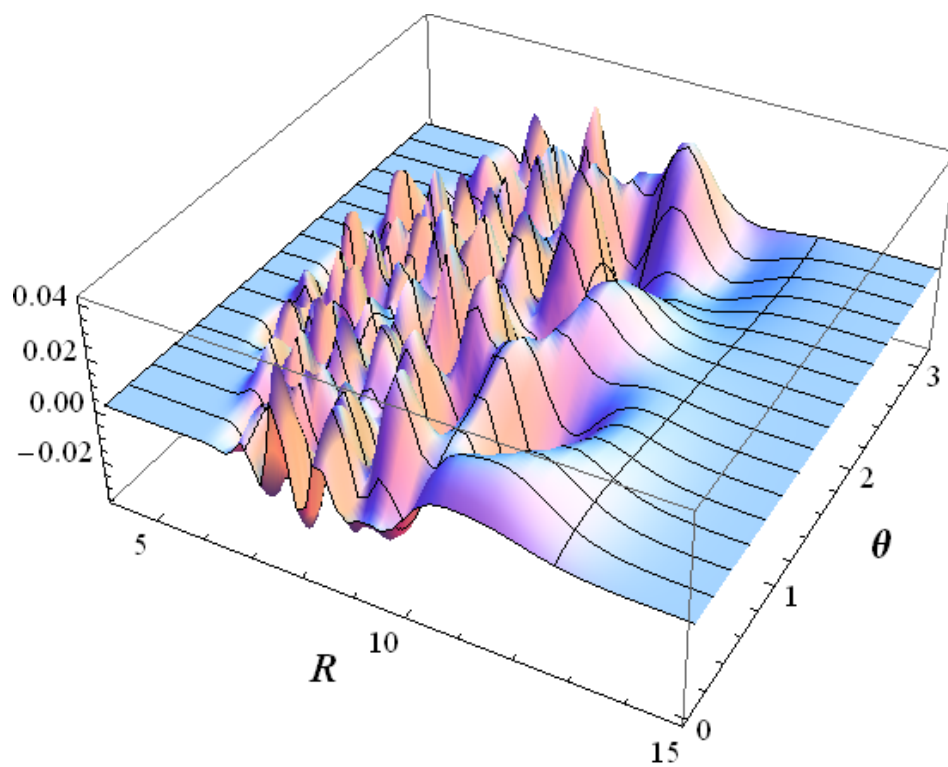

Figure S152. Eigenstate No. 152



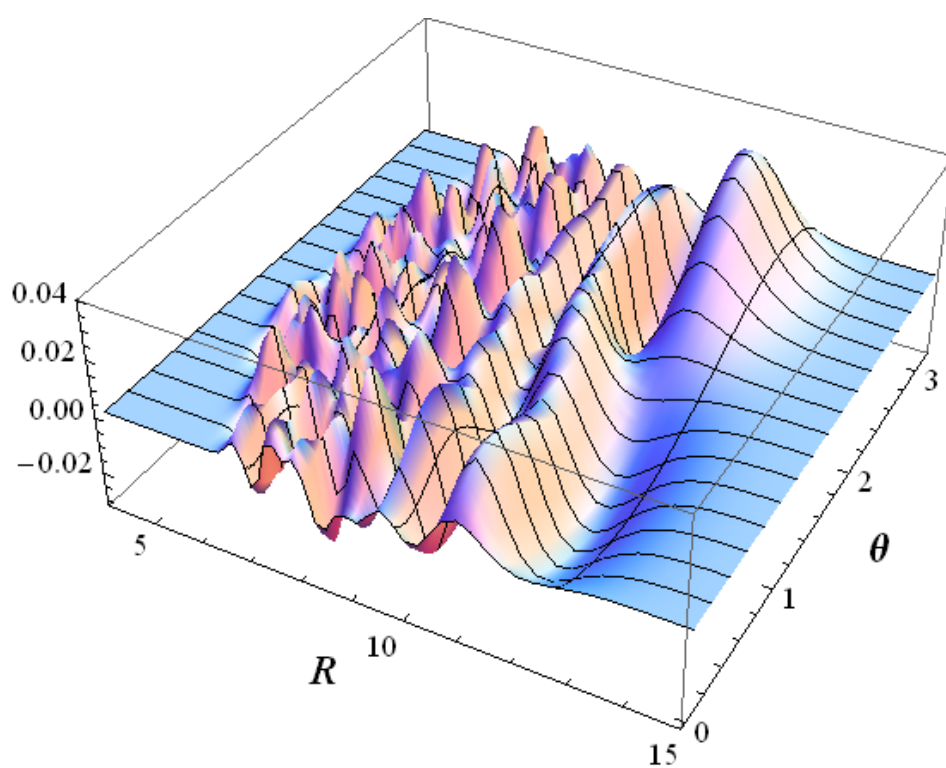

Figure S153. Eigenstate No. 153

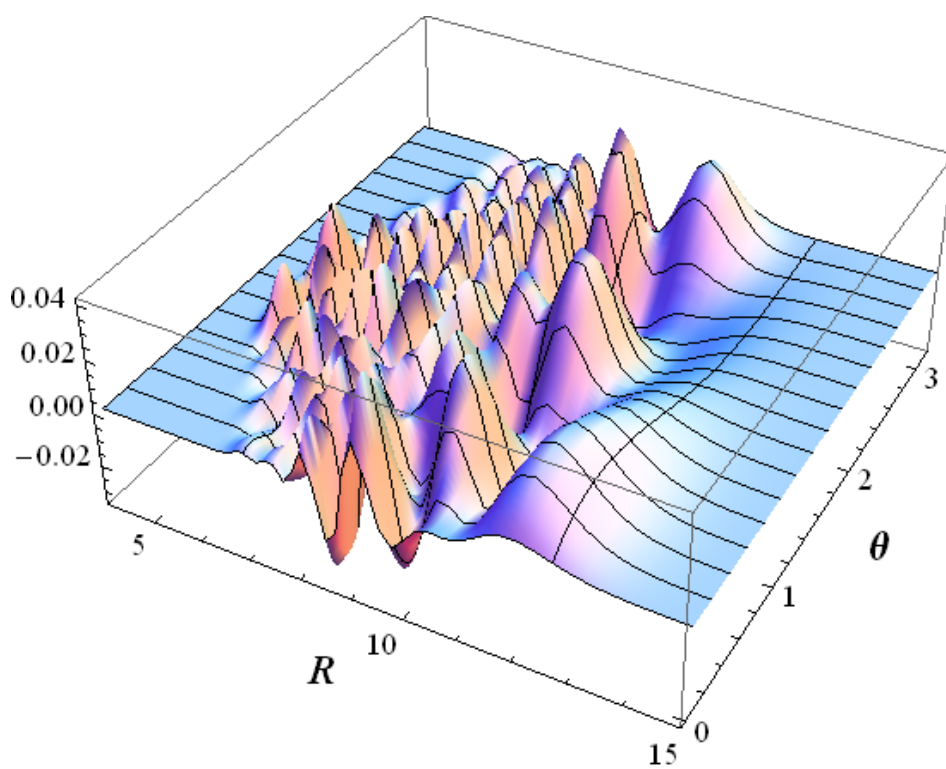

Figure S154. Eigenstate No. 154

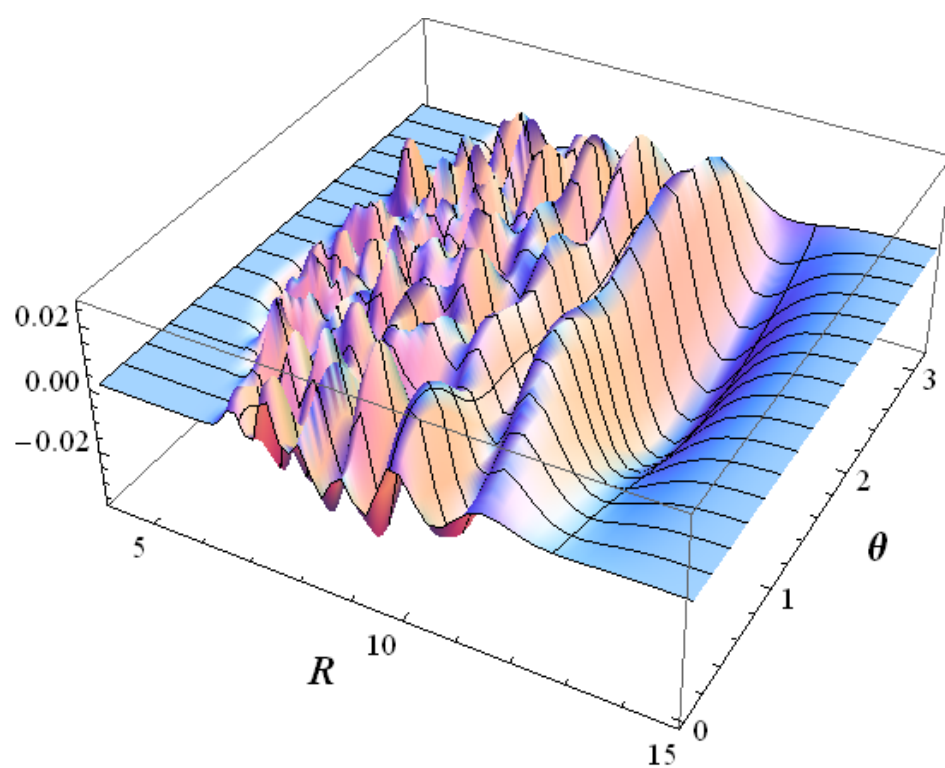

Figure S155. Eigenstate No. 155

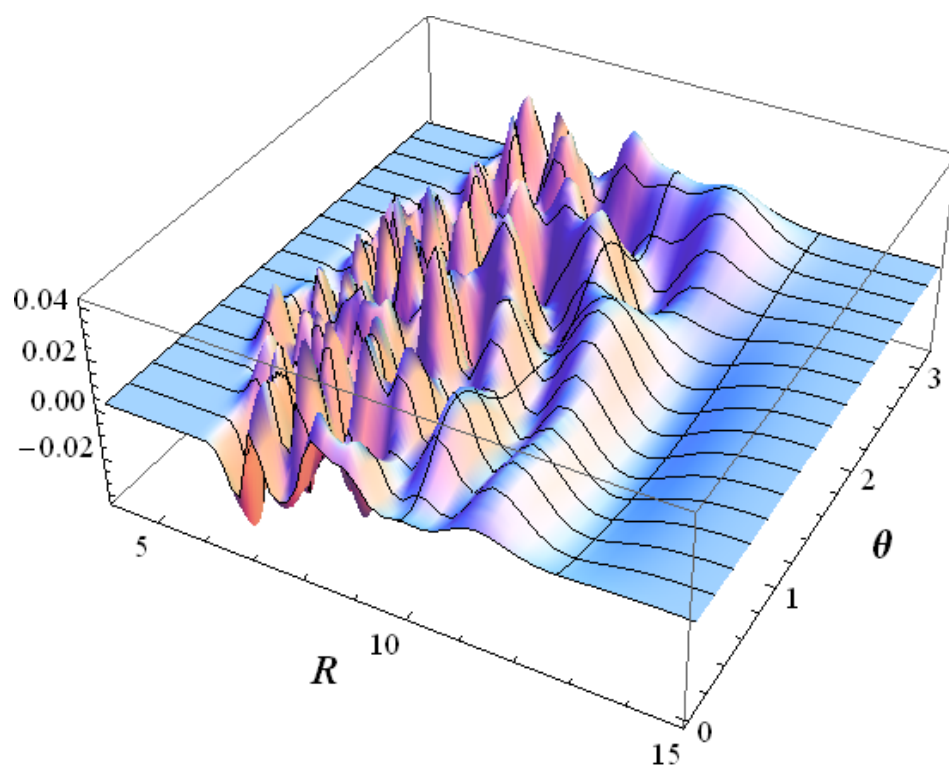

Figure S156. Eigenstate No. 156

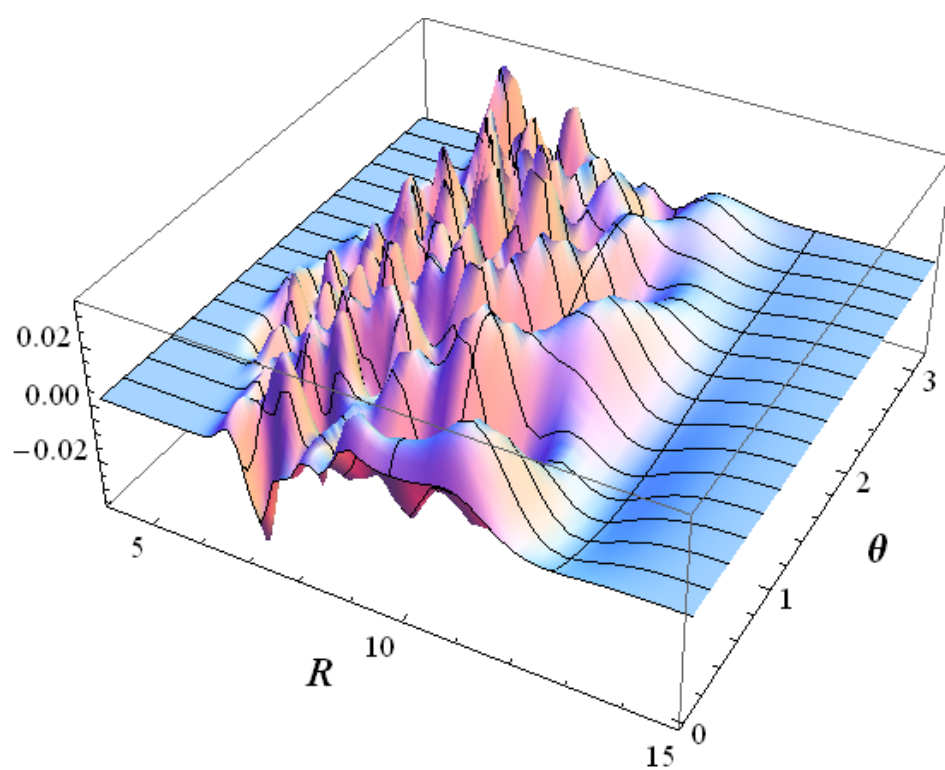

Figure S157. Eigenstate No. 157

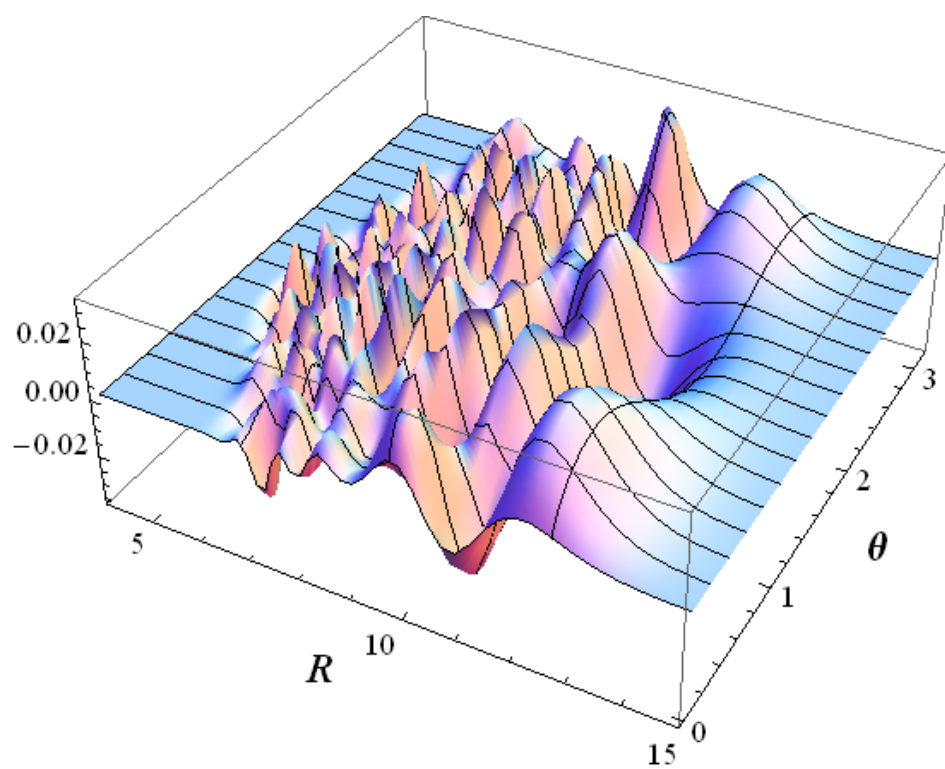

Figure S158. Eigenstate No. 158

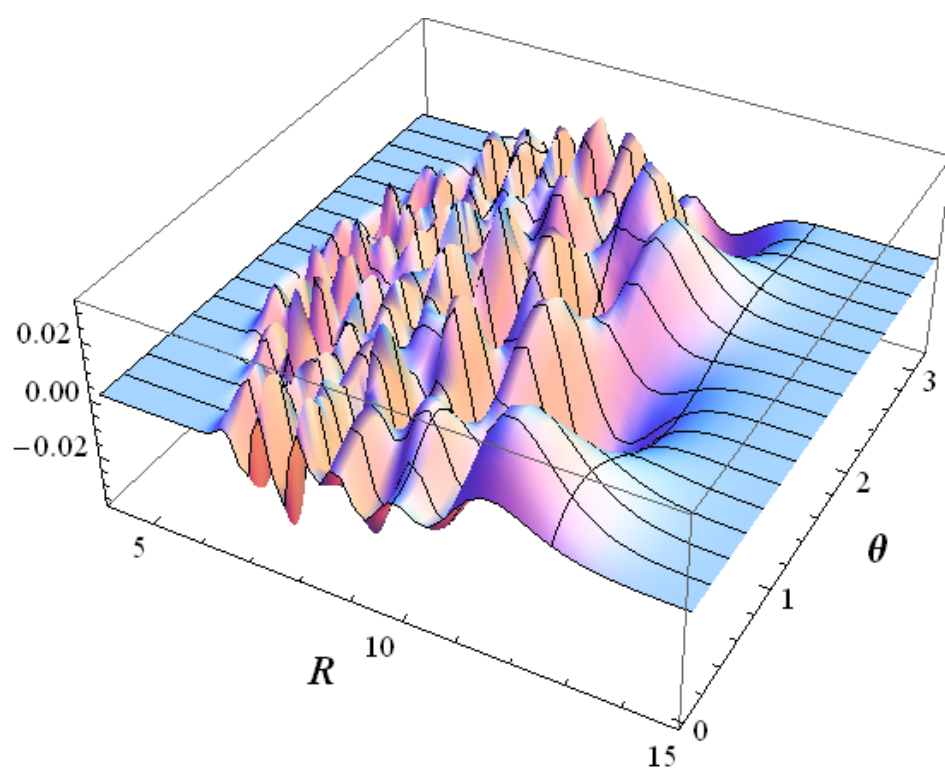

Figure S159. Eigenstate No. 159

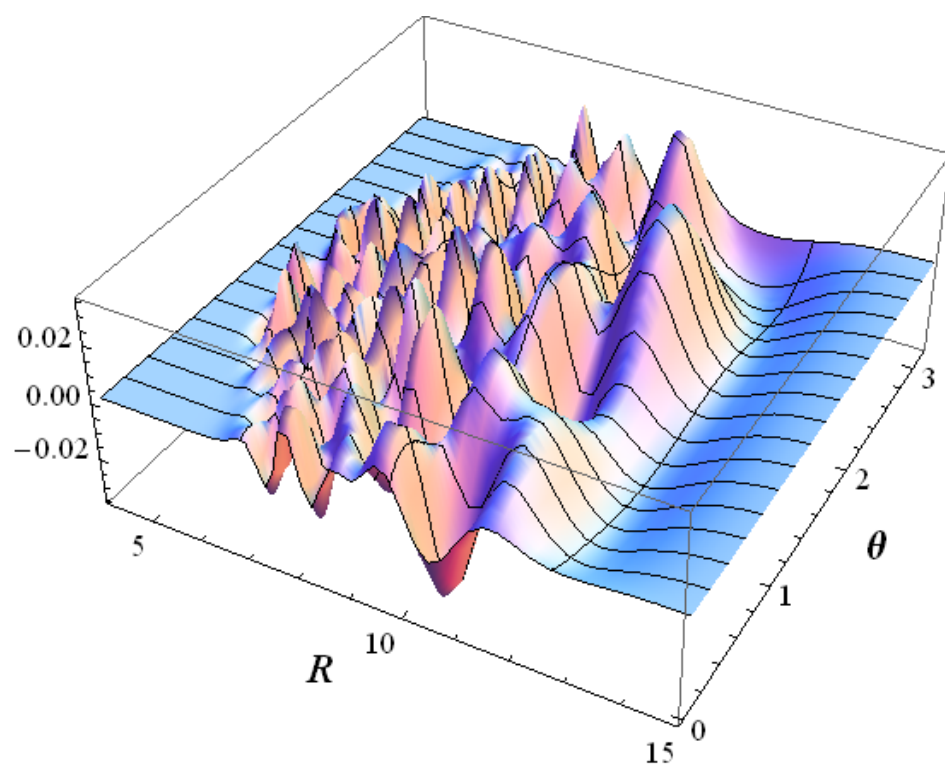

Figure S160. Eigenstate No. 160

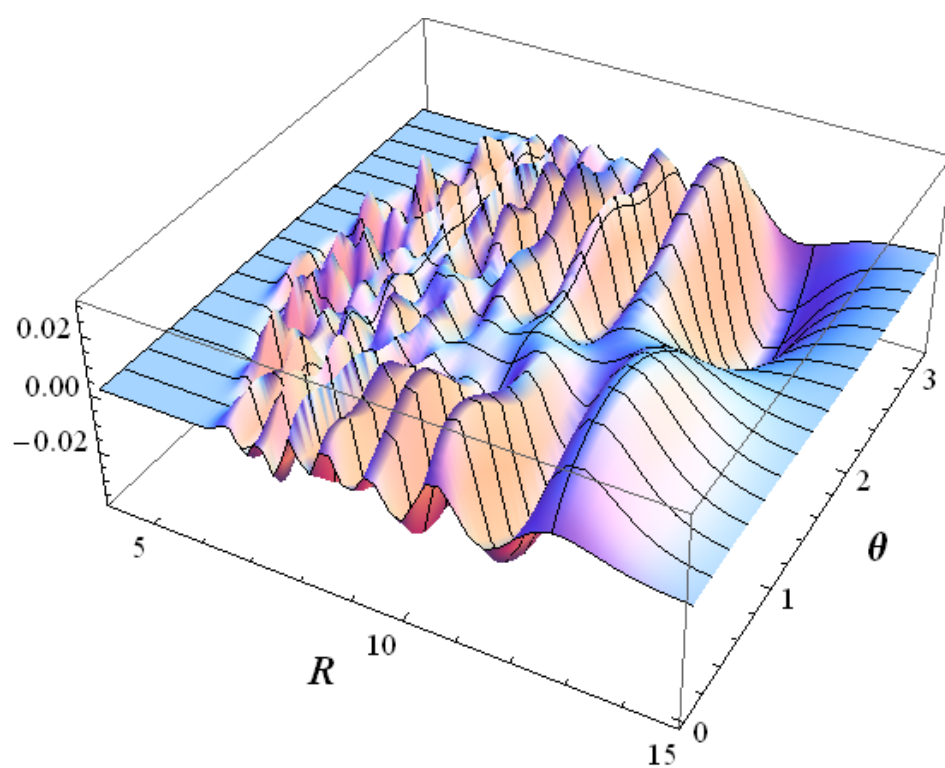

Figure S161. Eigenstate No. 161

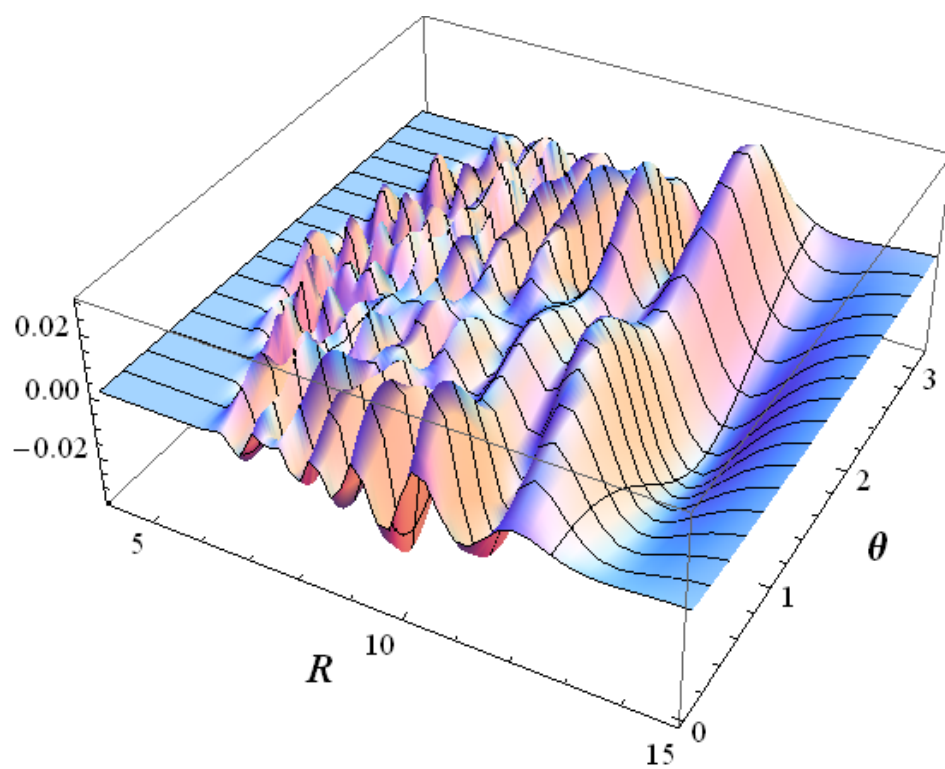

Figure S162. Eigenstate No. 162



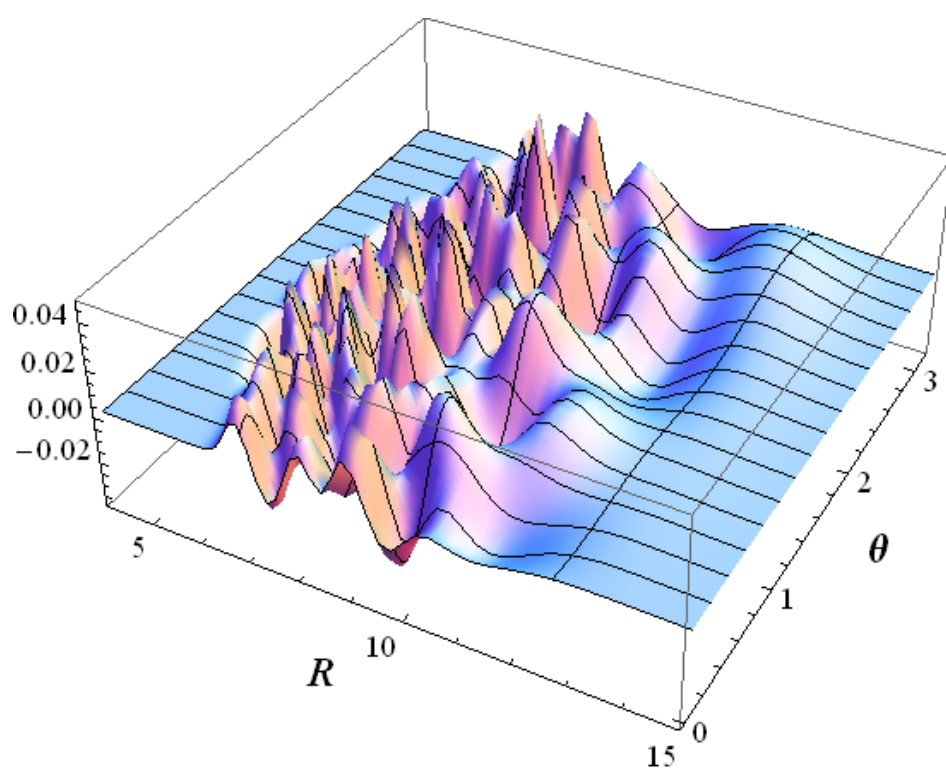

Figure S163. Eigenstate No. 163

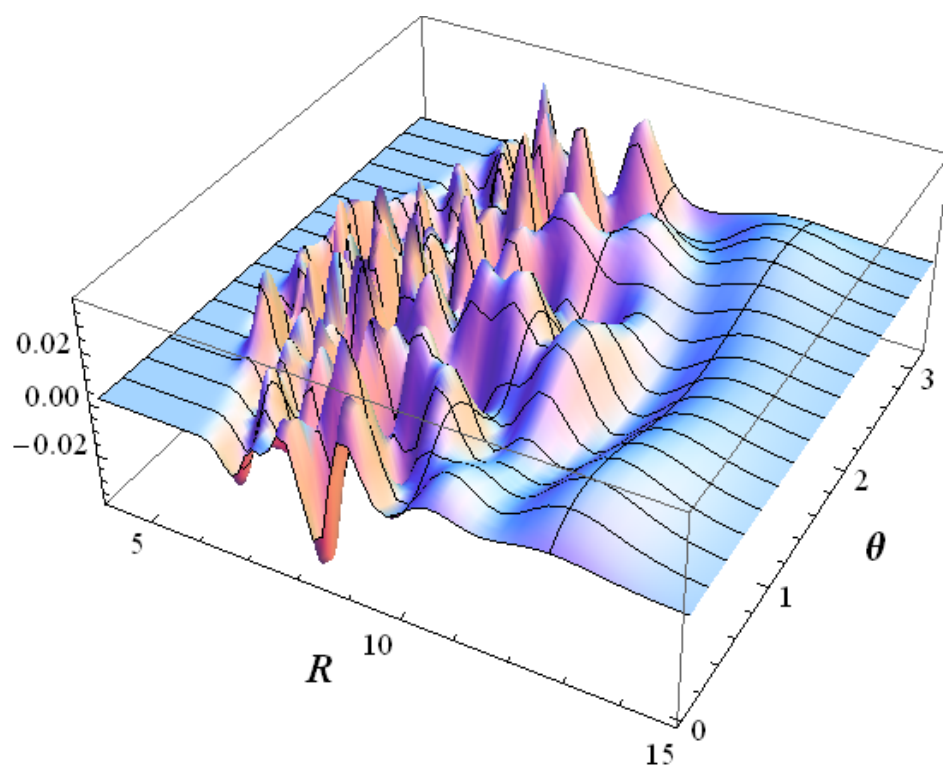

Figure S164. Eigenstate No. 164



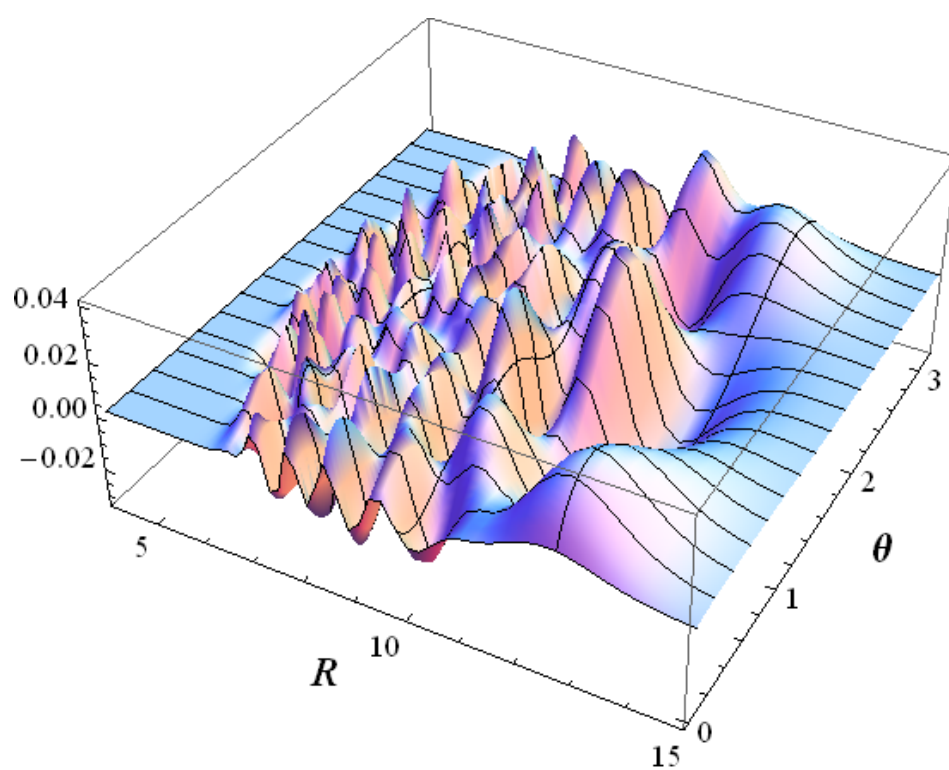

Figure S165. Eigenstate No. 165

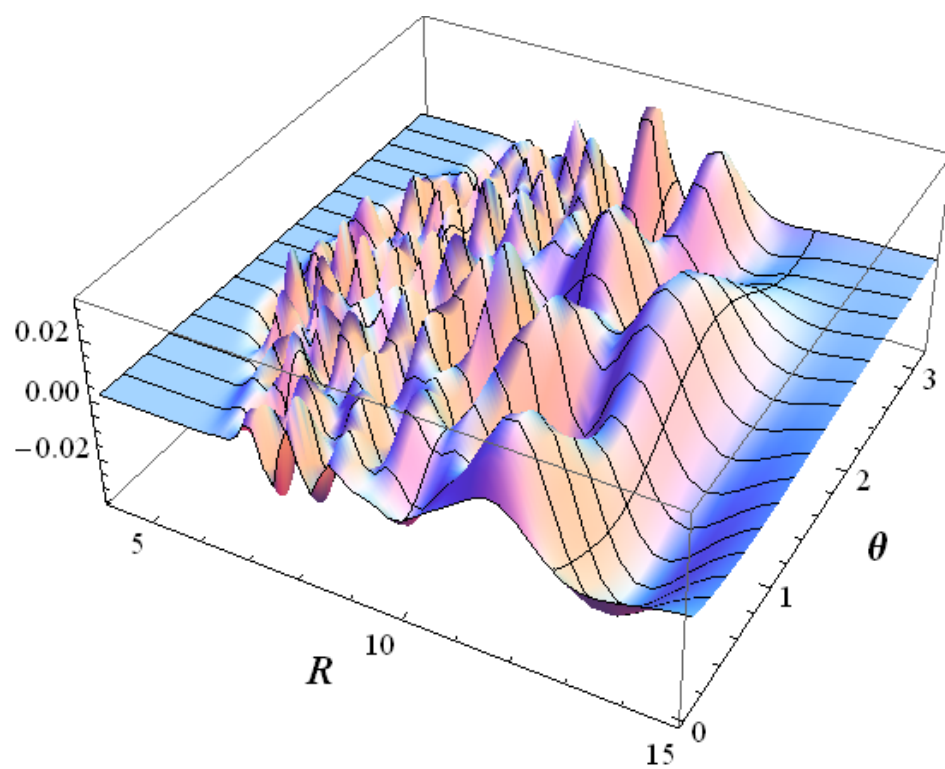

Figure S166. Eigenstate No. 166

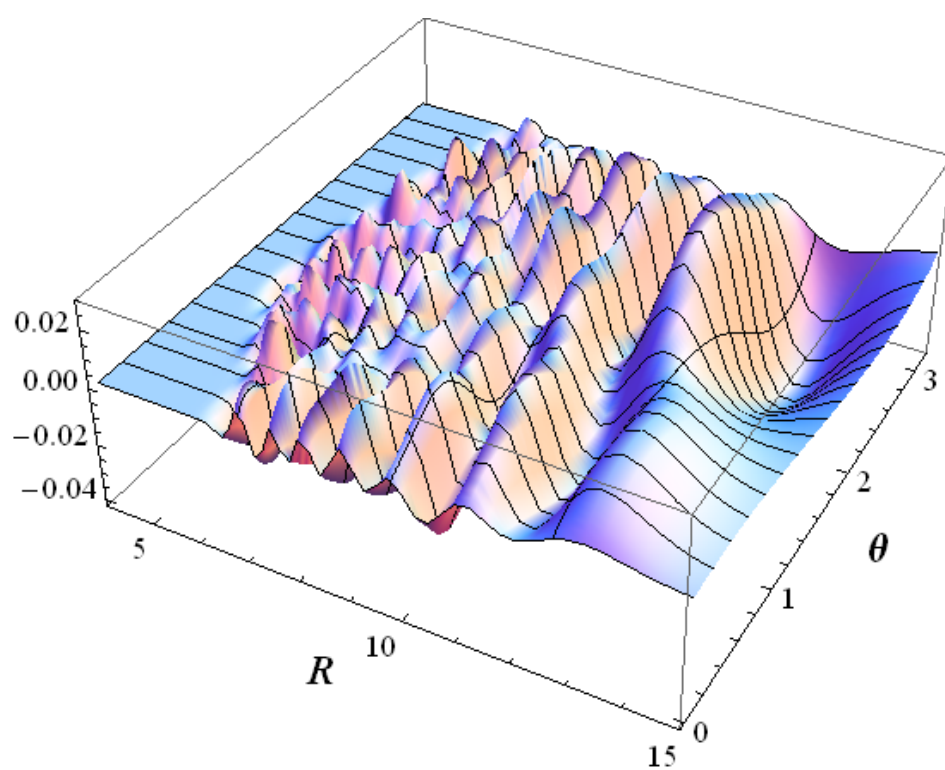

Figure S167. Eigenstate No. 167

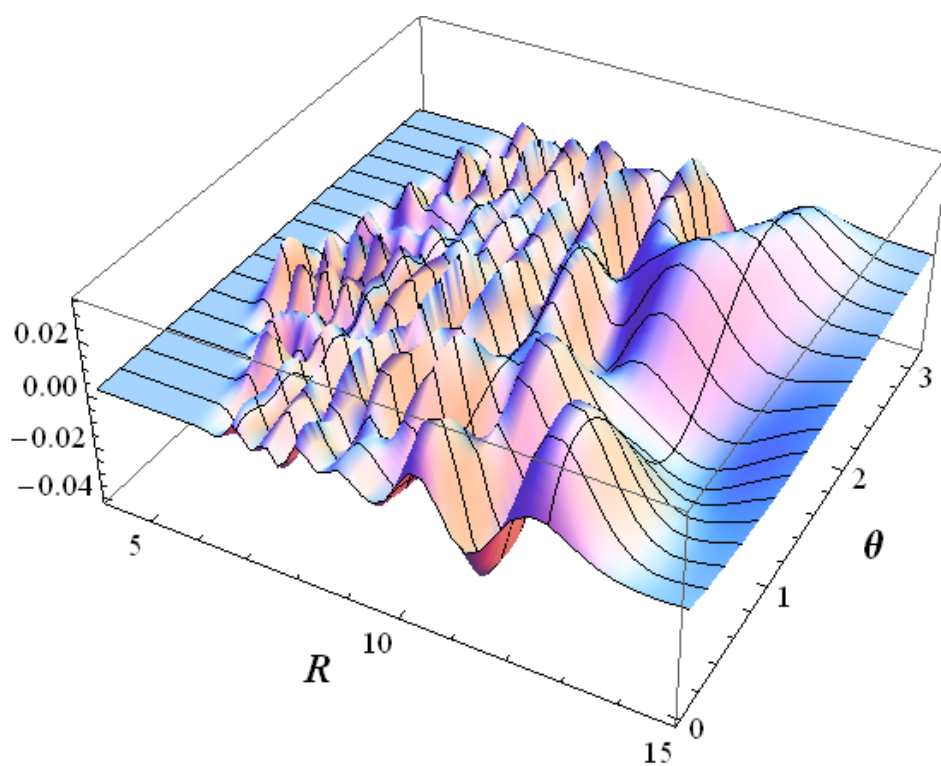

Figure S168. Eigenstate No. 168

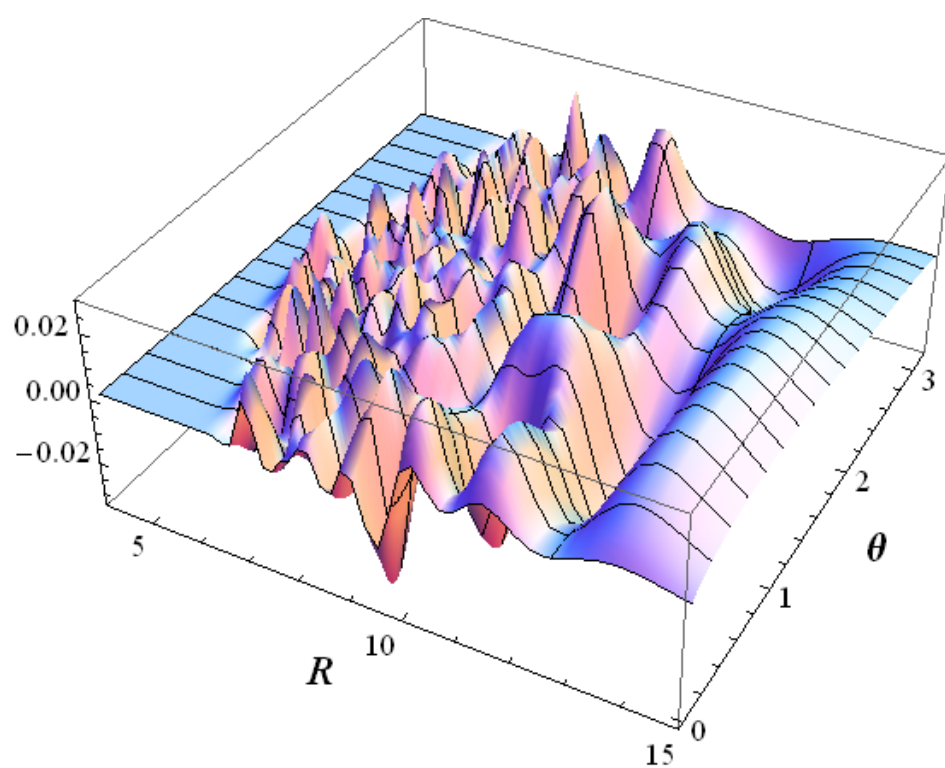

Figure S169. Eigenstate No. 169

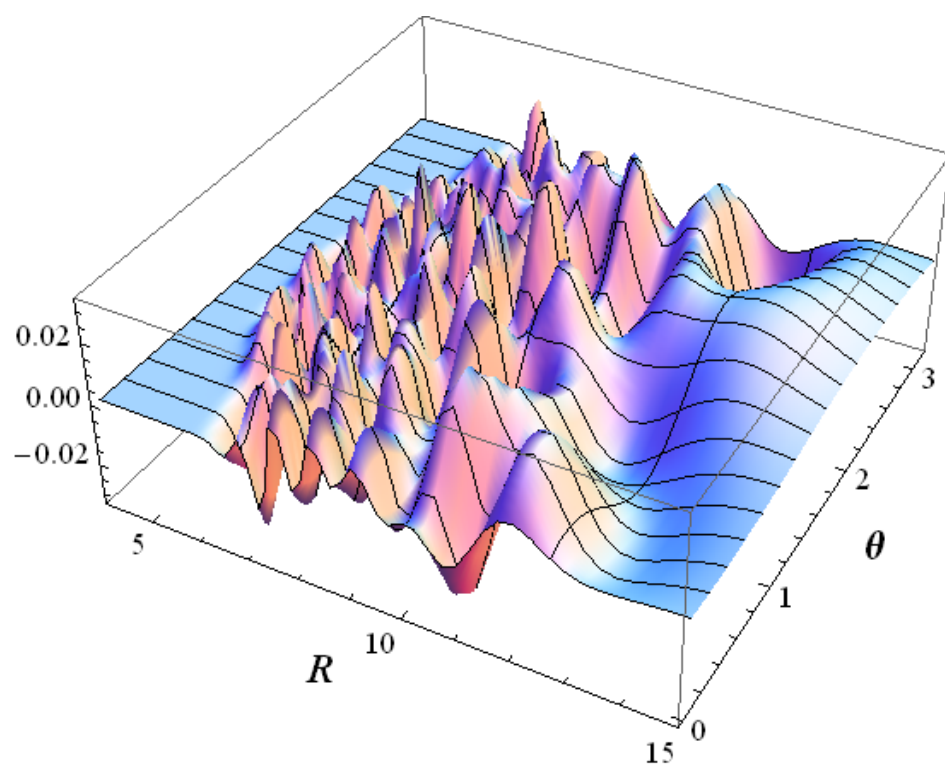

Figure S170. Eigenstate No. 170

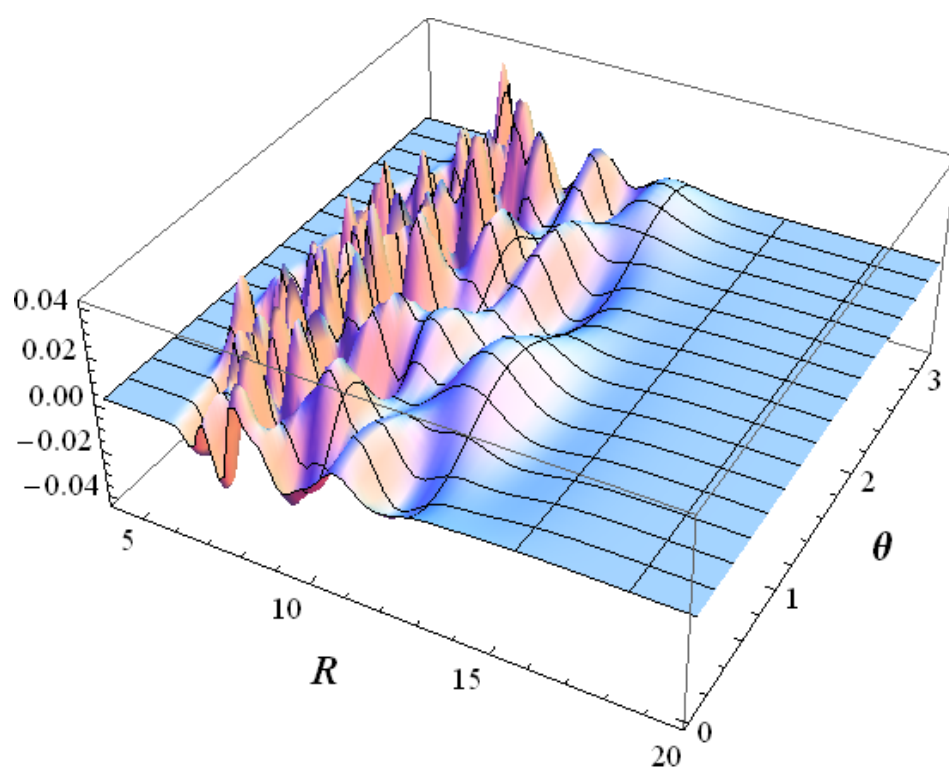

Figure S171. Eigenstate No. 171

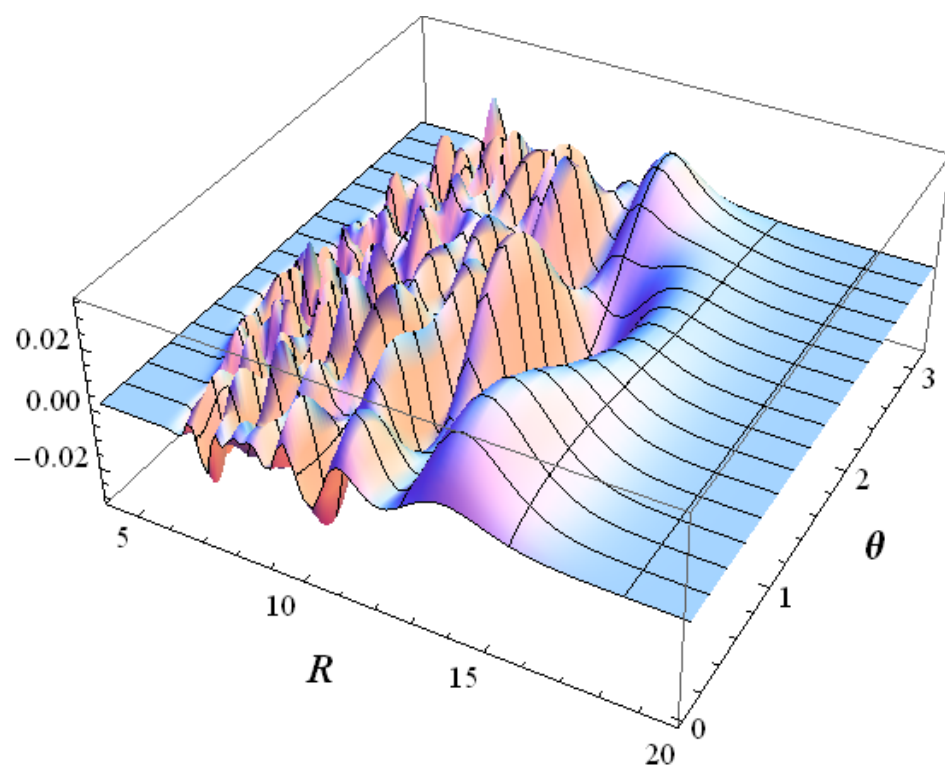

Figure S172. Eigenstate No. 172

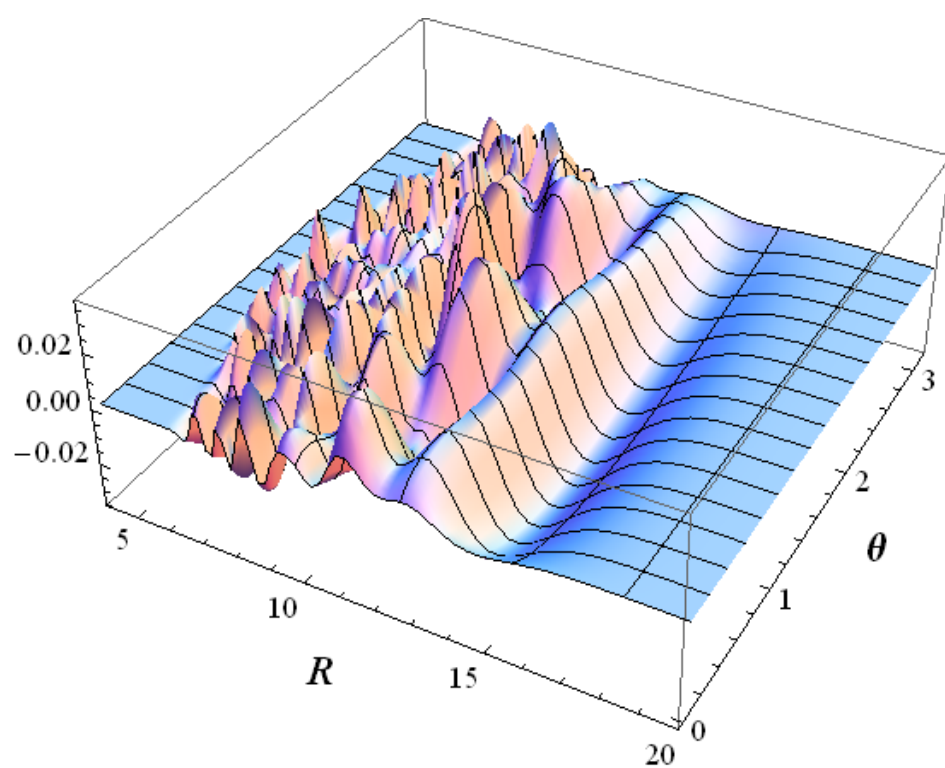

Figure S173. Eigenstate No. 173

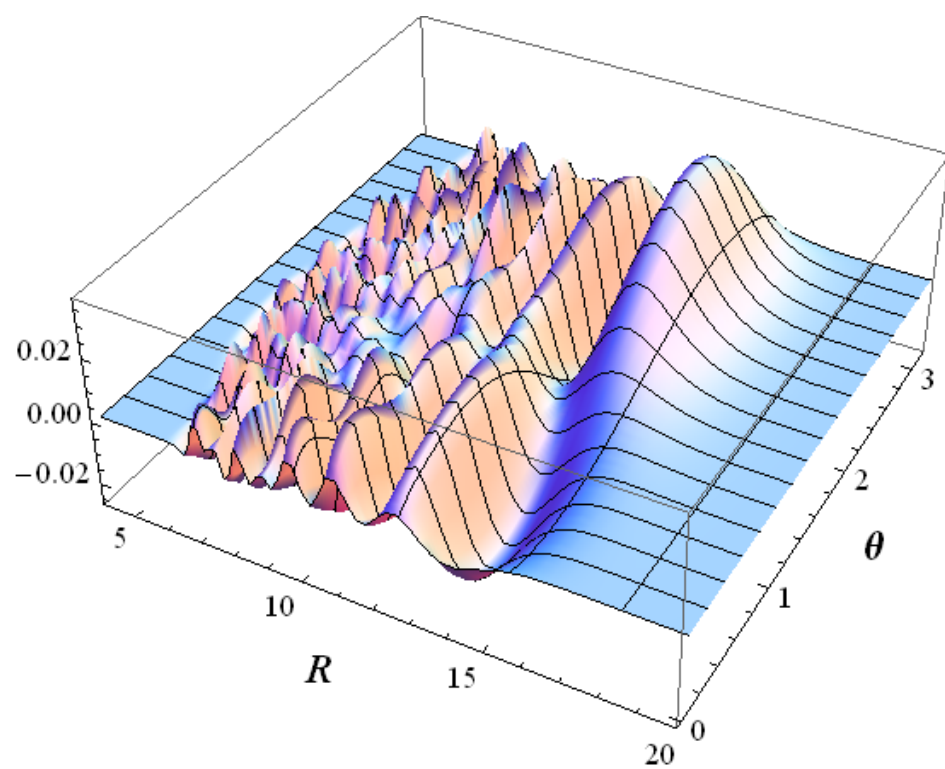

Figure S174. Eigenstate No. 174



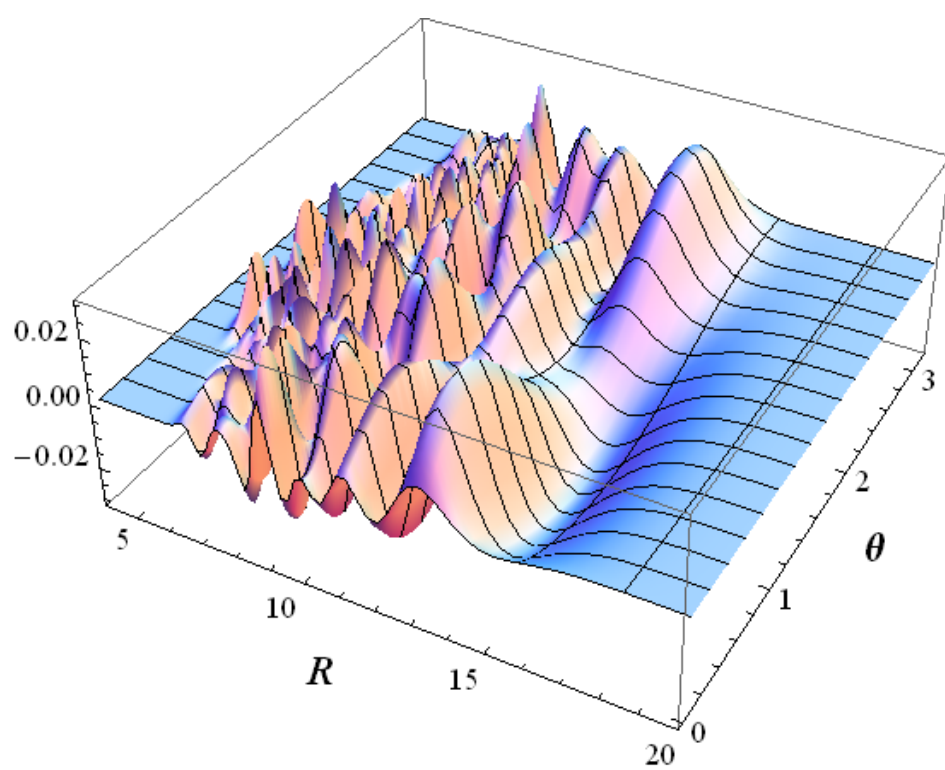

Figure S175. Eigenstate No. 175

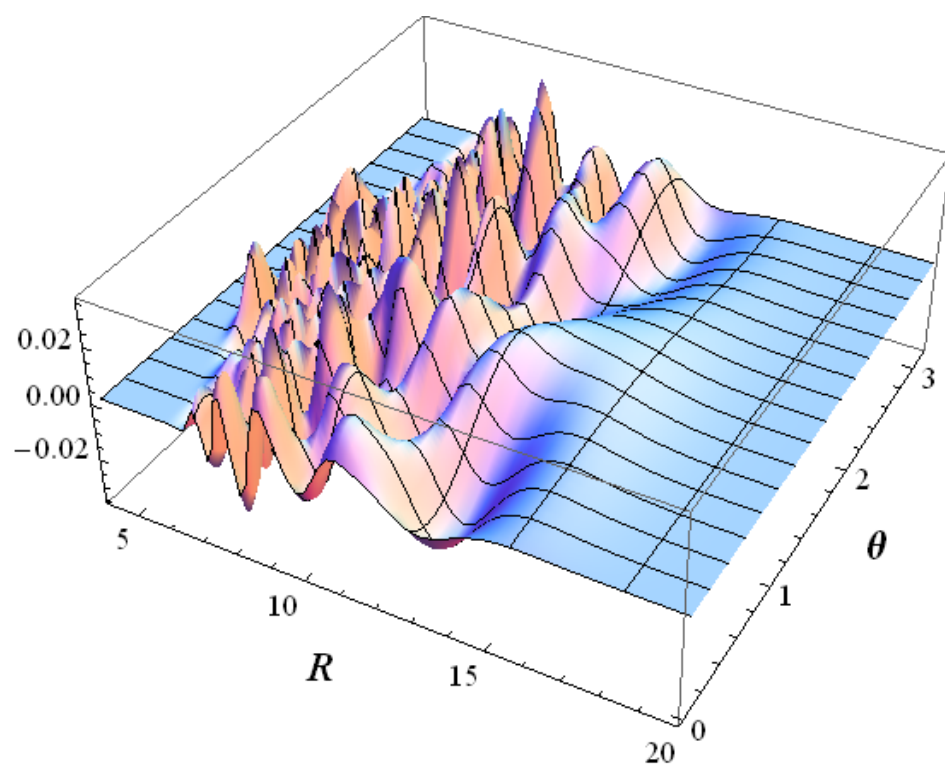

Figure S176. Eigenstate No. 176



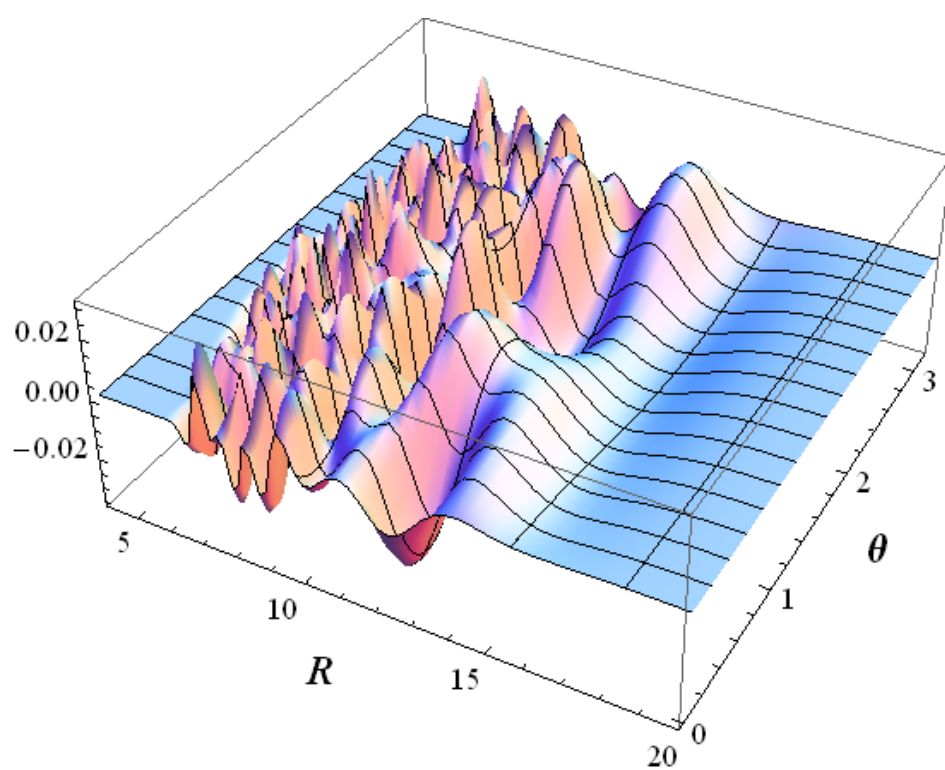

Figure S177. Eigenstate No. 177

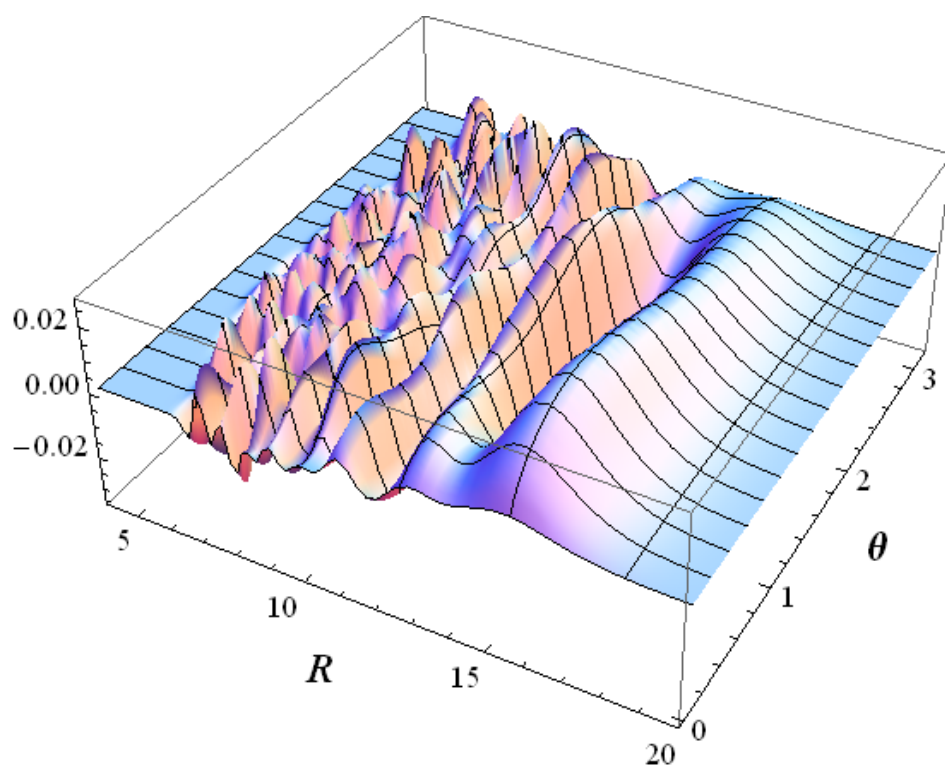

Figure S178. Eigenstate No. 178

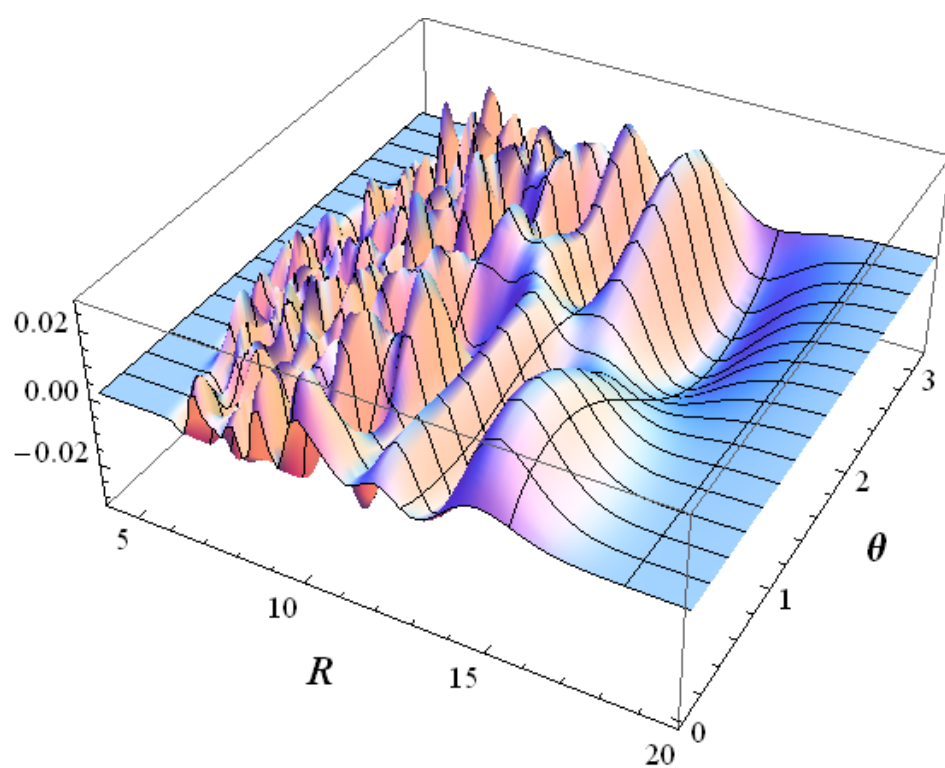

Figure S179. Eigenstate No. 179

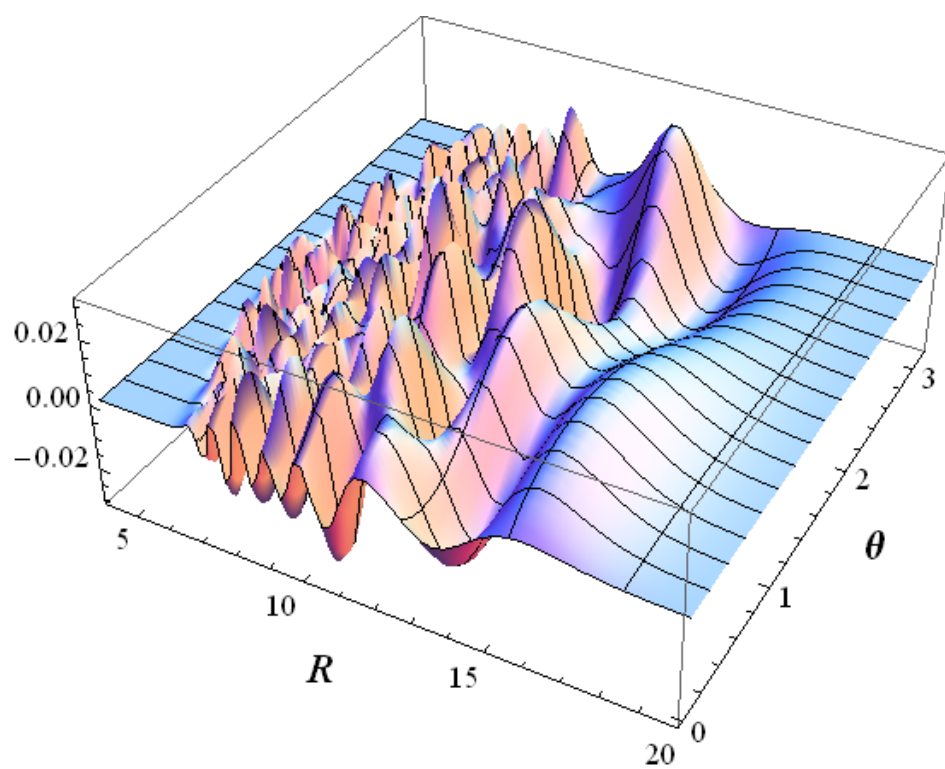

Figure S180. Eigenstate No. 180

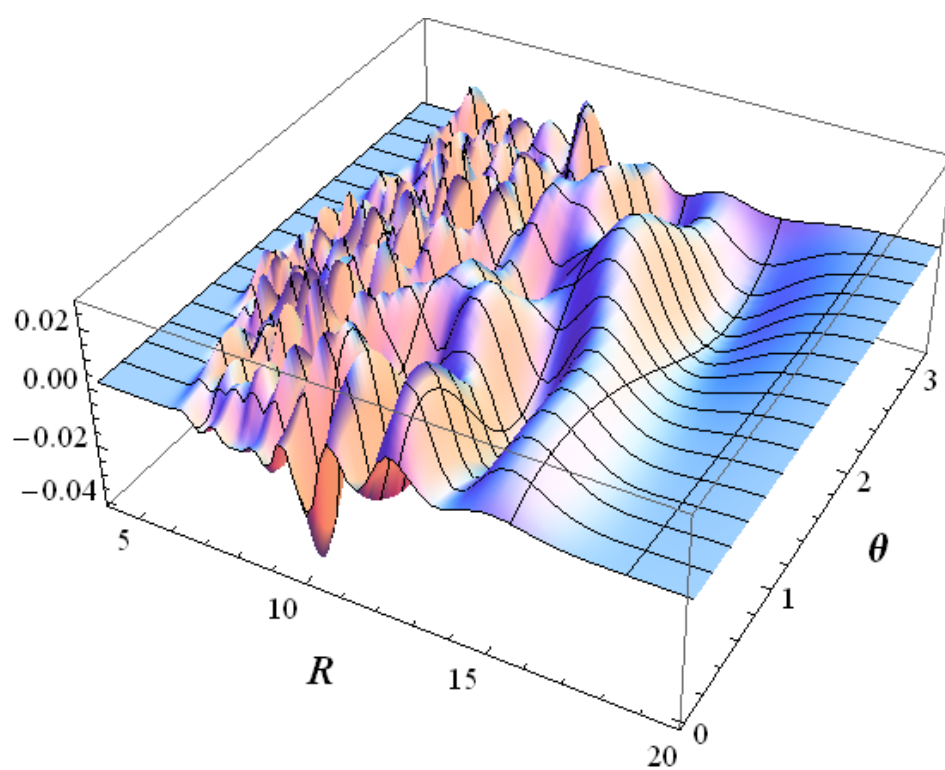

Figure S181. Eigenstate No. 181

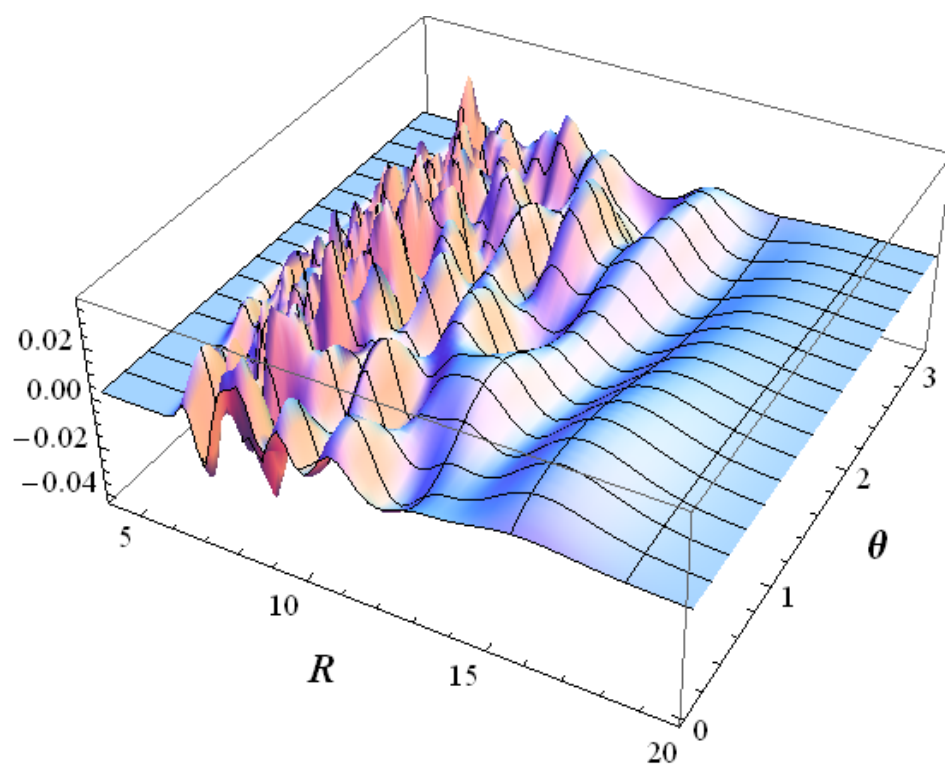

Figure S182. Eigenstate No. 182

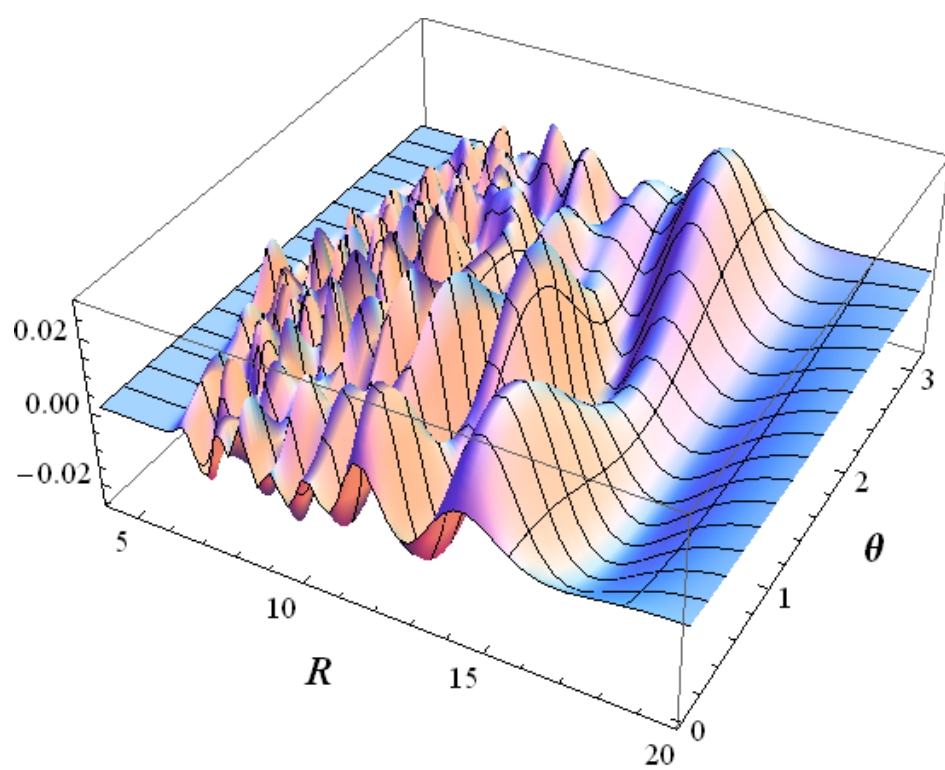

Figure S183. Eigenstate No. 183

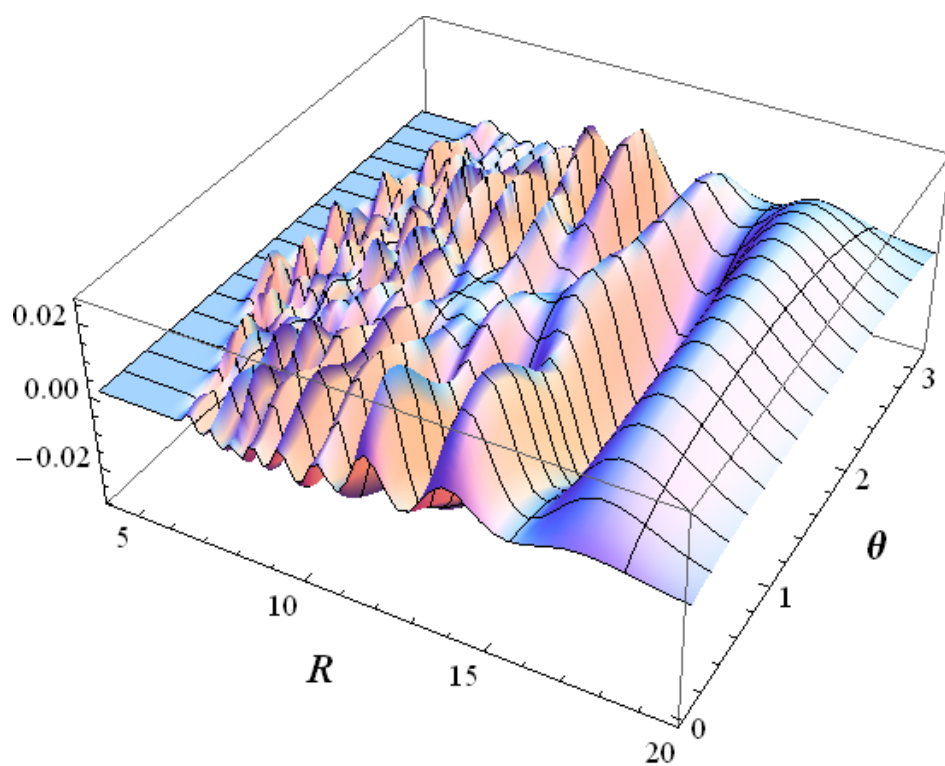

Figure S184. Eigenstate No. 184

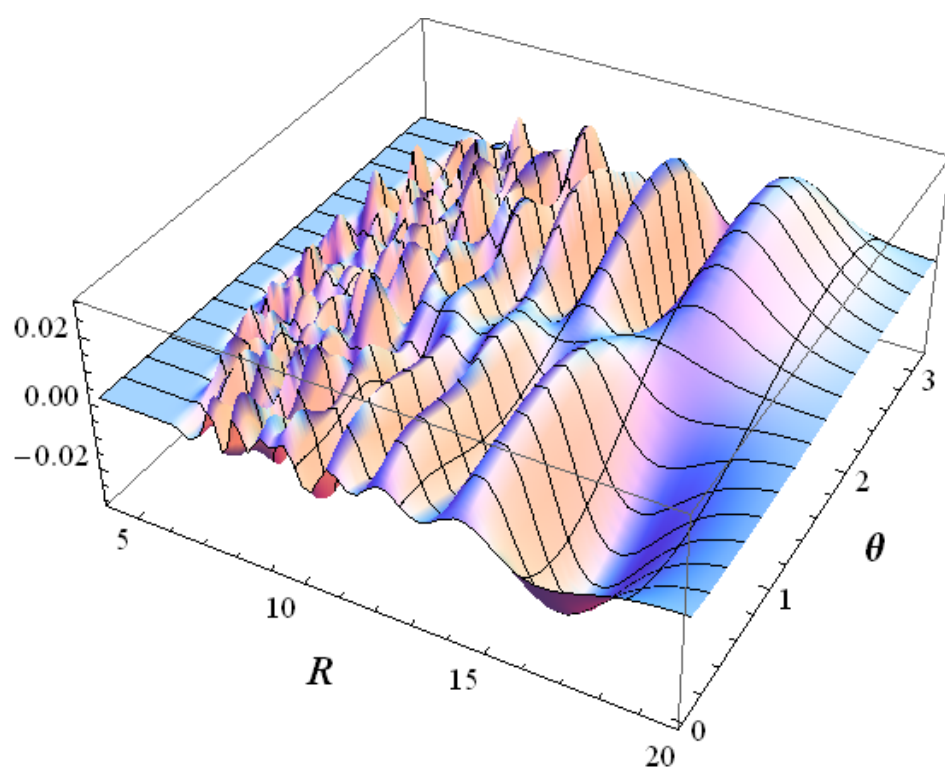

Figure S185. Eigenstate No. 185

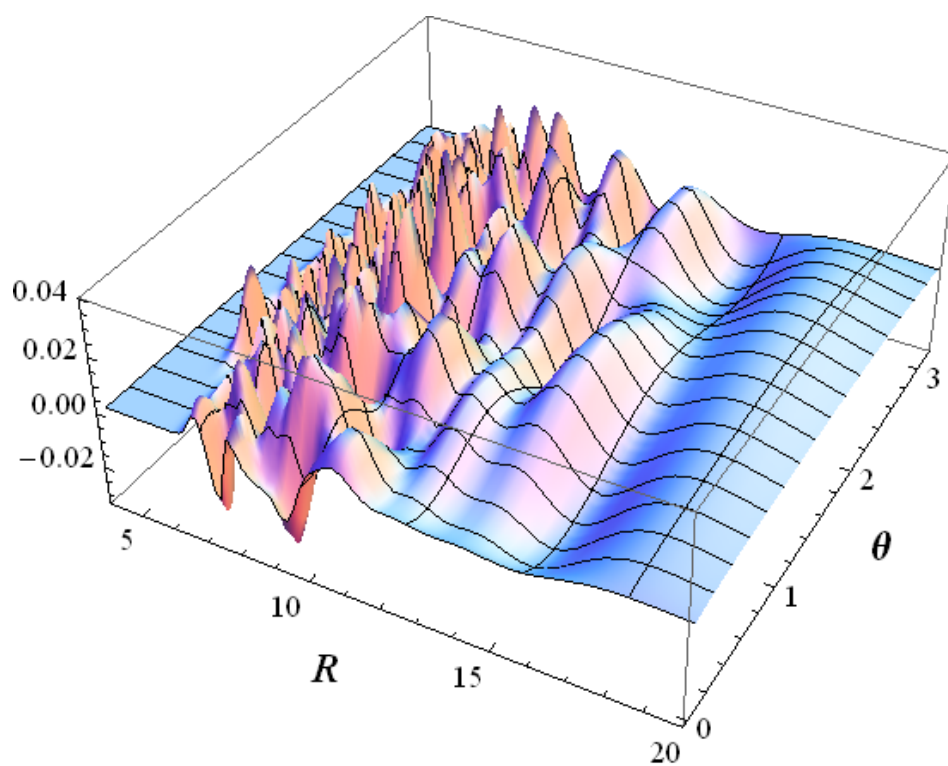

Figure S186. Eigenstate No. 186



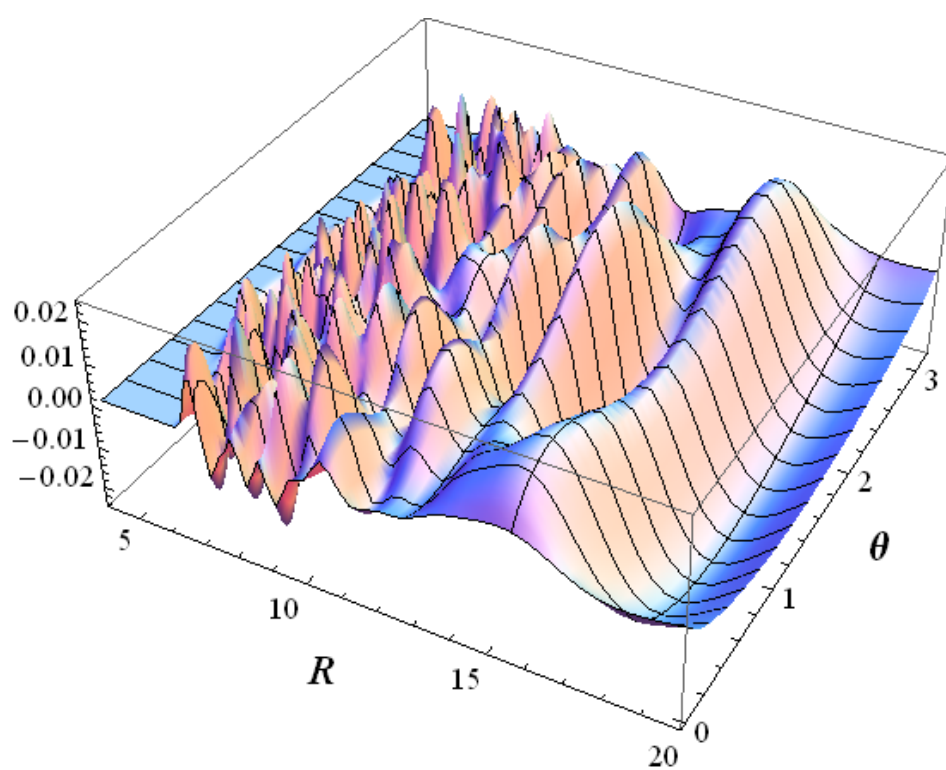

Figure S187. Eigenstate No. 187

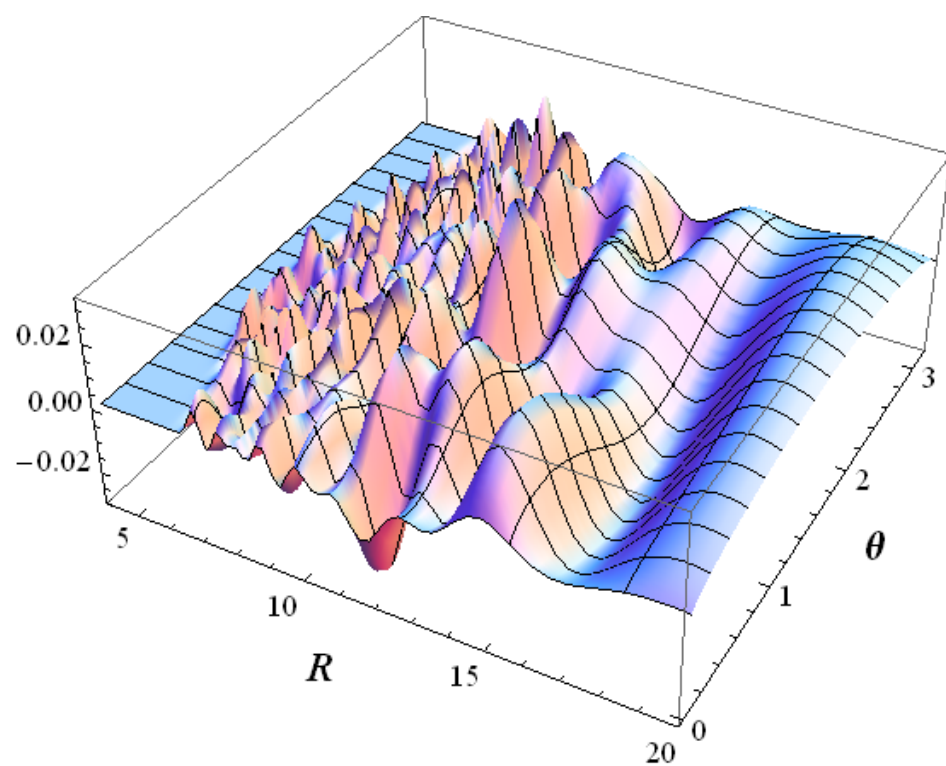

Figure S188. Eigenstate No. 188



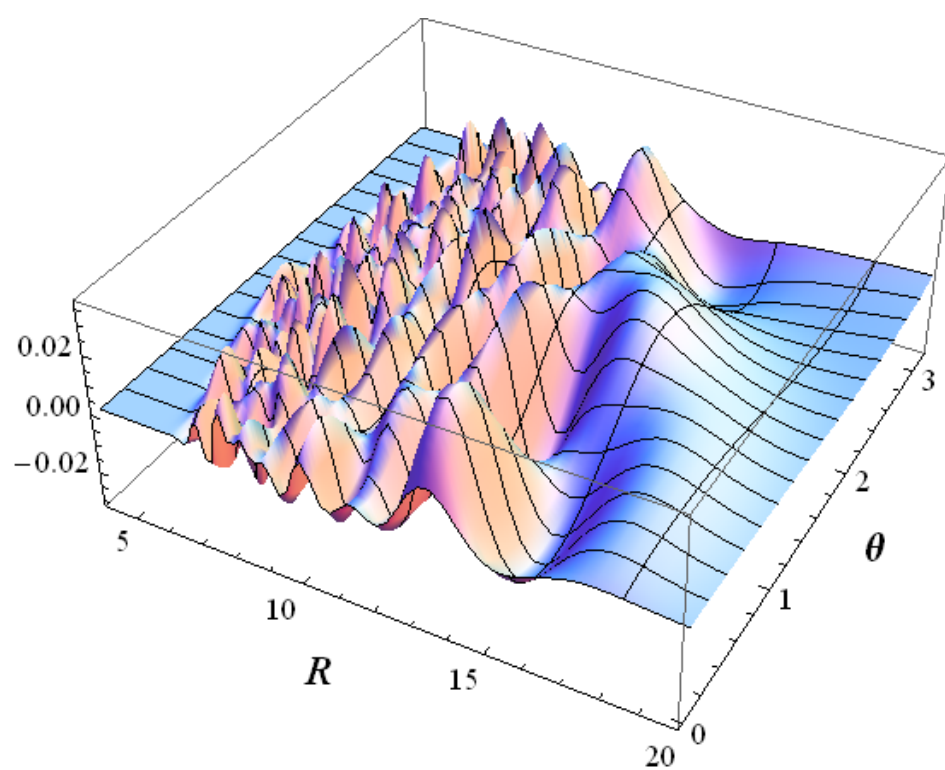

Figure S189. Eigenstate No. 189

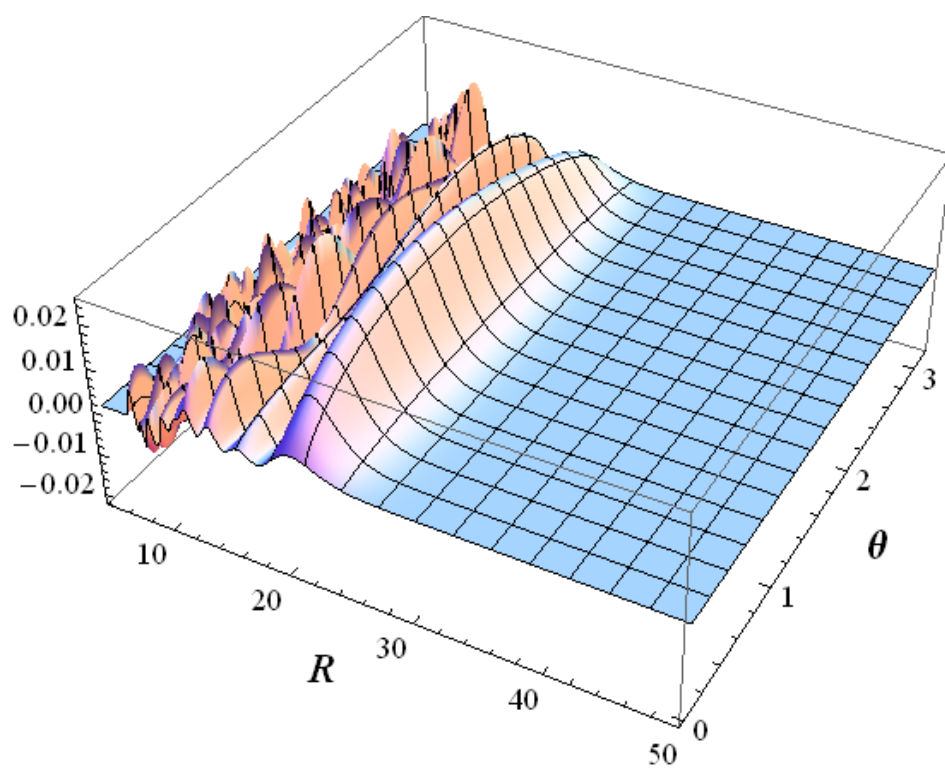

Figure S190. Eigenstate No. 190

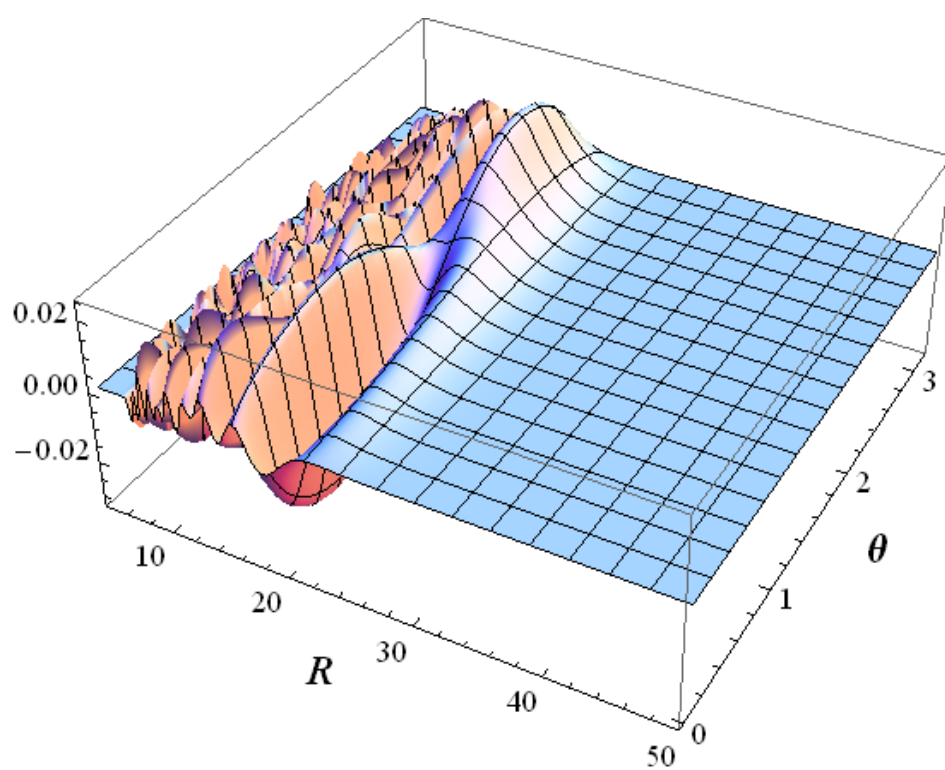

Figure S191. Eigenstate No. 191

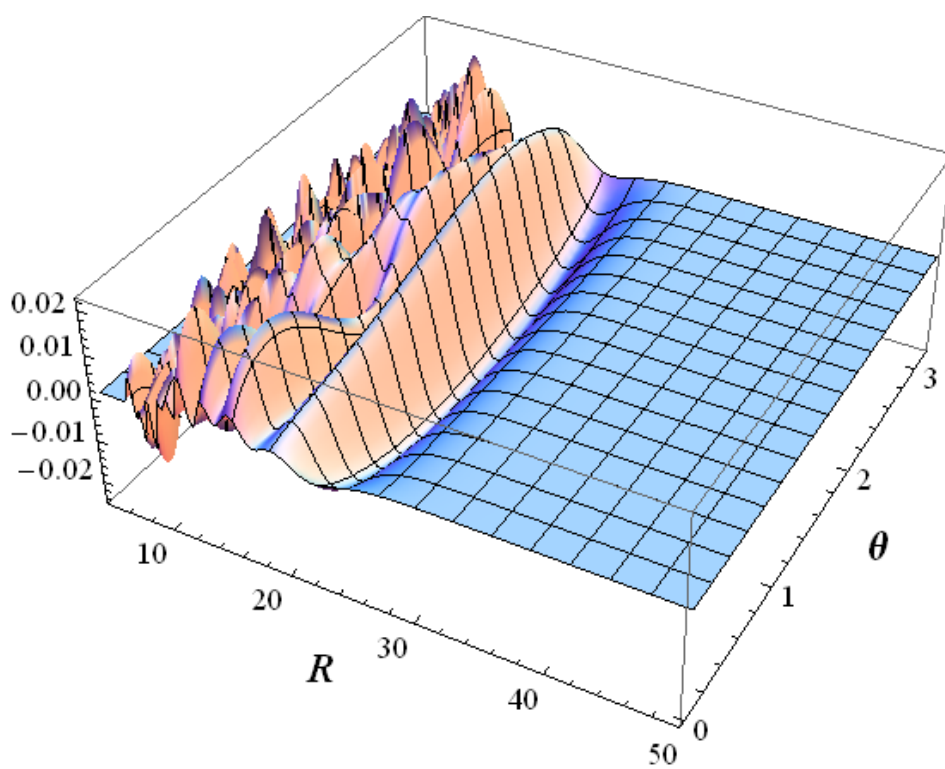

Figure S192. Eigenstate No. 192

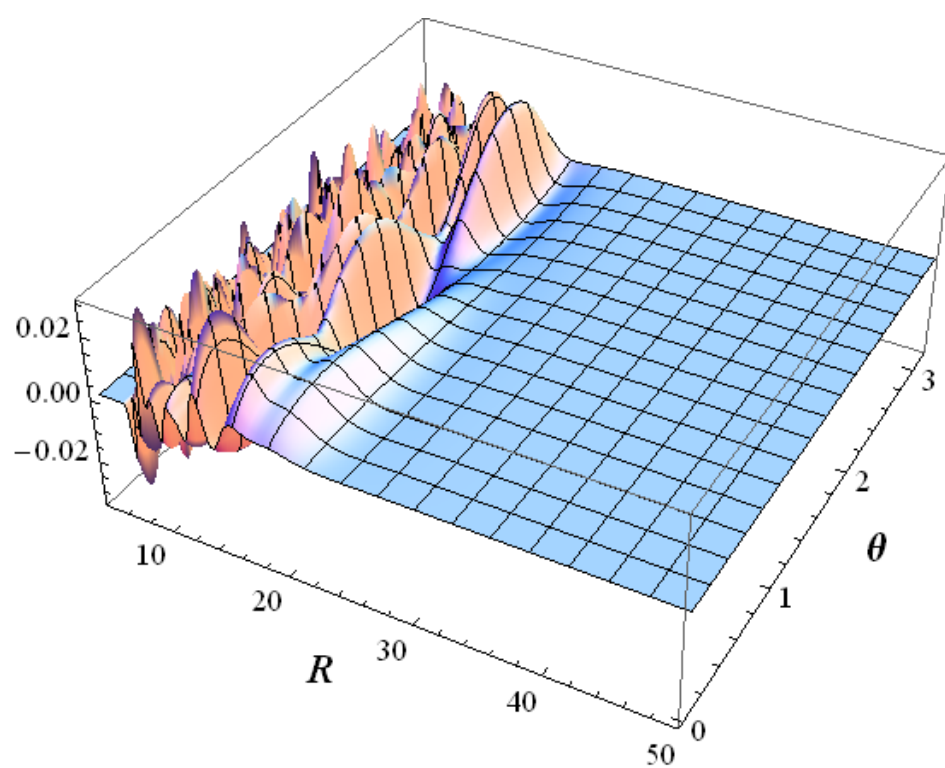

Figure S193. Eigenstate No. 193

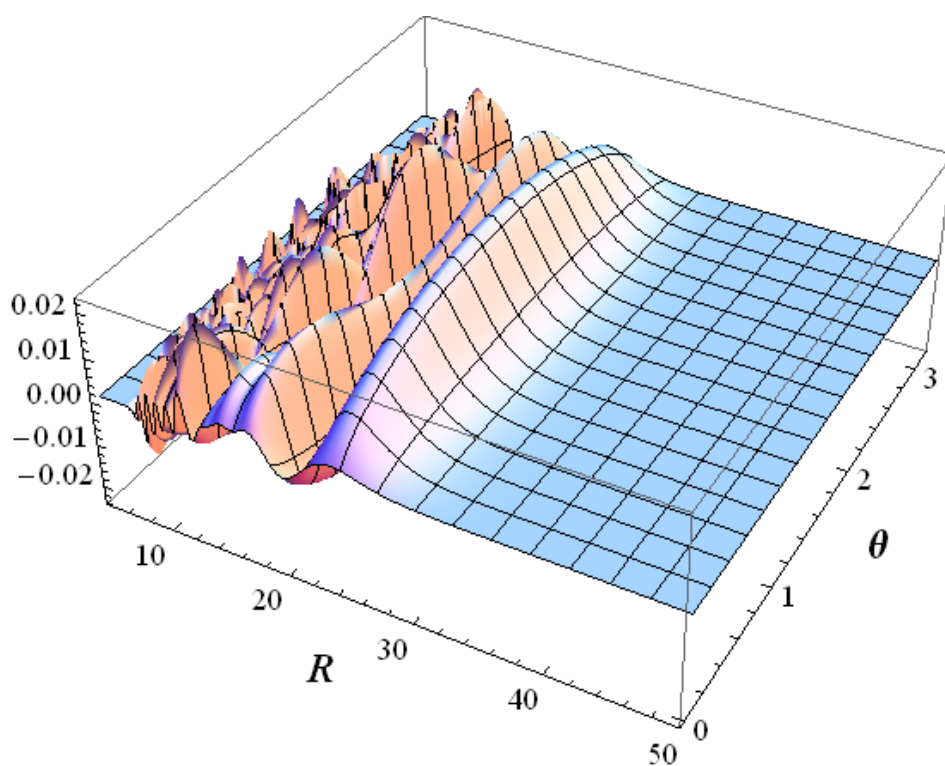

Figure S194. Eigenstate No. 194

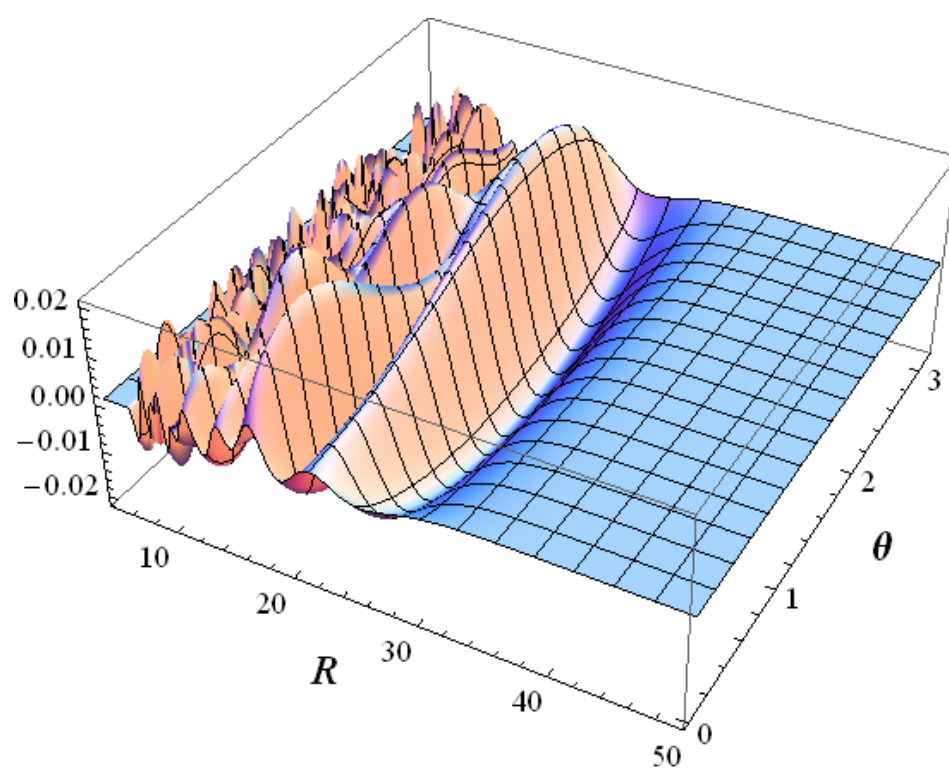

Figure S195. Eigenstate No. 195

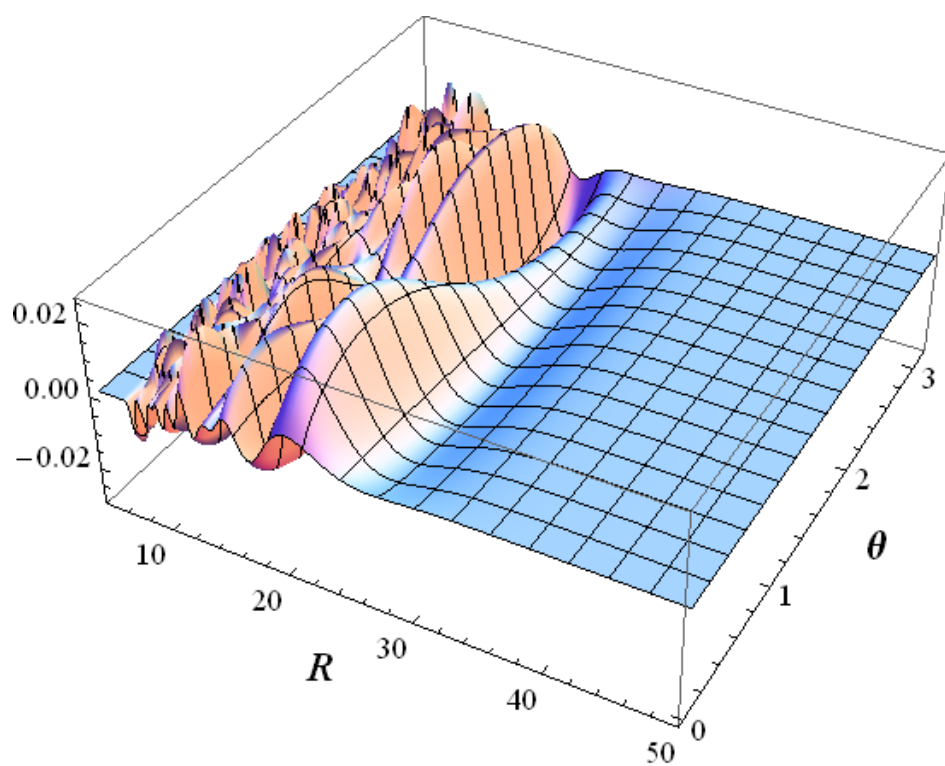

Figure S196. Eigenstate No. 196

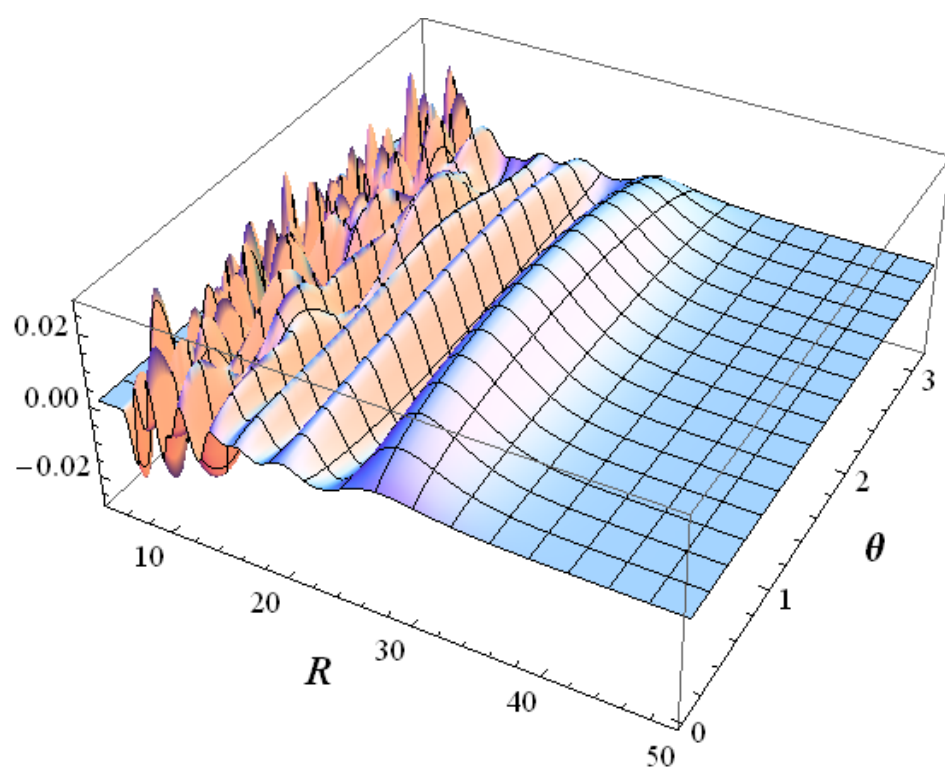

Figure S197. Eigenstate No. 197

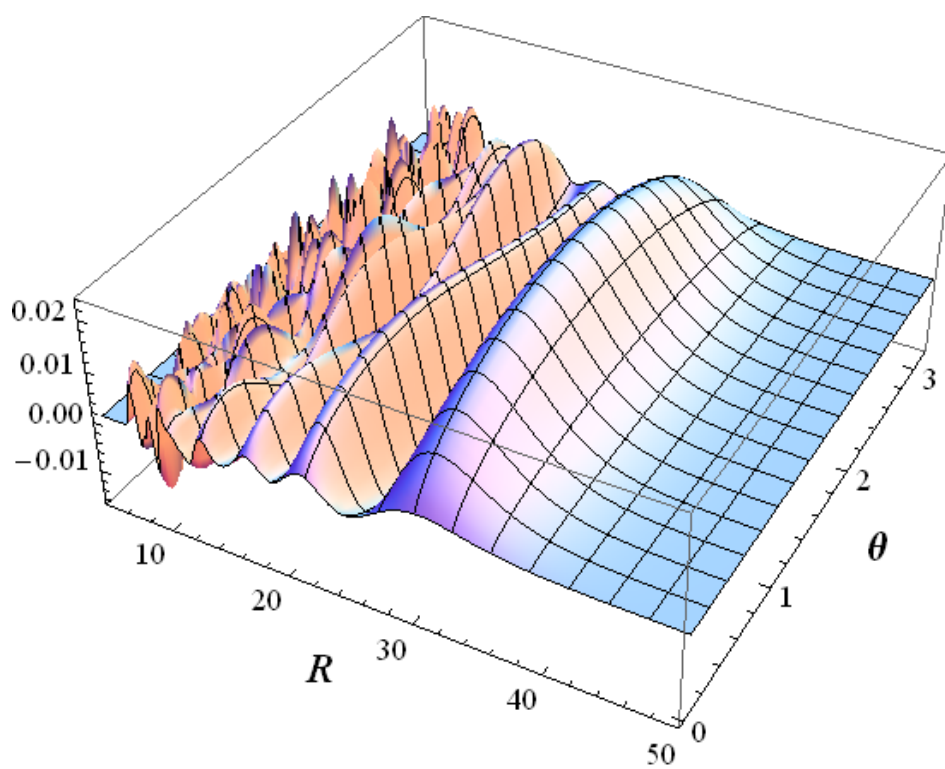

Figure S198. Eigenstate No. 198



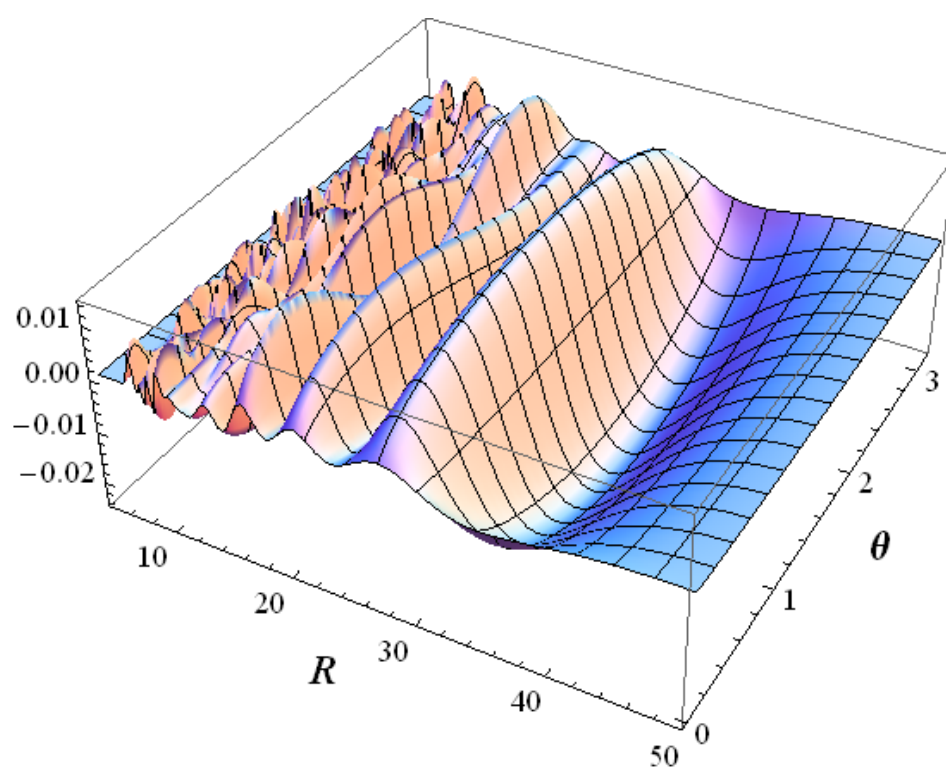

Figure S199. Eigenstate No. 199

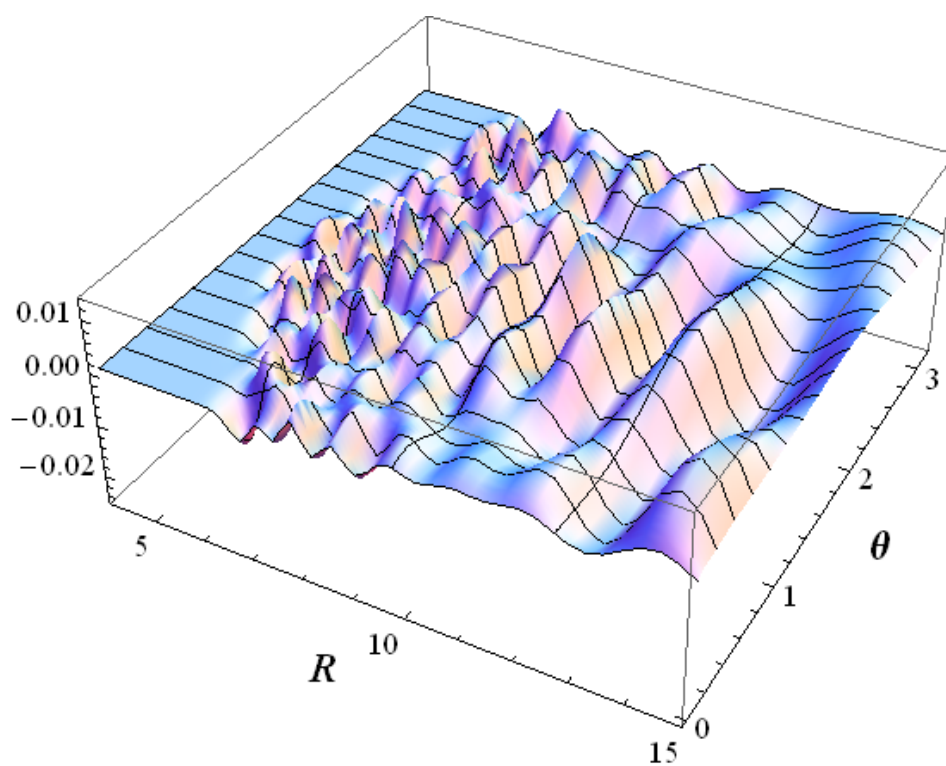

Figure S200. Eigenstate No. 200
